# Supplementary material for: LGG-1/GABARAP lipidation is not required for autophagy and development in Caenorhabditis elegans
Source: eLife journal article supplement (doi:10.7554/elife.85748), 2023-07-03
Supplement: supp [file 20201005- V2 -comptage LGG-2 Spe-11hsp6gfp.xlsx]

## Sheet: Feuil1
20201005 - Spe11hsp6::GFP / LGG-2
ctrl	Spe-11::hsp6::GFP	LGG-2	coloc
s10 - 1C	6	26	0
S08 - 4C	0	22	0
s08 - 8C	0	20	0
s07 - 4C	0	35	0
20201007 - Spe11hsp6::GFP / LGG-2
s03 - 2C	9	23	2
s02 - 1C	40	43	10
s07- 2C	8	18	2
S05 - 1C	52	45	21
s09 - 4C	5	4	0
s014 - 2C	22	23	4
s013 - 2C	25	30	7
pp65	Spe-11::hsp6::GFP	LGG-2	coloc		Observation microscope
S01 - 1C	44	40	4		non marqué pour hsp6::GFP
s03 - 2C	5	27	0		20C	n= 12
s06 - 1C	46	30	5		15C	n= 8
s05- 2C	5	31	0		1C /2C	n=4
s06-1C	30	33	5
s010 - 2C	38	43	4
s09 - 2C	32	23	1
S011 - 4C	26	22	5
S014 - 4C	35	47	10
s08- 1C	24	20	4
s012- 6C	10	4	0
S024 - 4C	7	45	0
S024 - 1C	12	4	0
S024 - 1C	34	42	6
s027 - 1C	27	0	0
s019 - 1C	37	28	6	très petit point
s029 - 1C	41	20	4
s029- 4C	22	18	7
s034 - 8C	23	30	11
s 004 - 20C	2	138	1	( grosse structure LGG-2)
s029- 6C	29	33	5
038 - 6 C	5	40	1
037 - 4C	5	25	0
026 - 20C	6	63	2
025 - 8C	18	39	7
s039 - 6 C	38	34	6
10C	12	27	1
pp141	Spe-11::hsp6::GFP	LGG-2	coloc
8C	30	28	2
4C - 02	28	23	1
2- 001	27	35	7
2C - 00	49	32	8
2C 005	35	32	5
4C- 012	38	20	0
2C - 003	40	36	8
4C - s020	34	35	8
12C- S13	35	24	6
1C- 009	30	25	6
4C s011	42	19	3
2C-s10	39	30	5
2C - 41	26	20	1
8C-s040	27	7	1
S39 - 8C	38	3	0
S38- 4C	45	30	1
s035 - 1C	42	18	3
s037 - 2C	26	36	4
s034 - 15	44	9	0
s033-	37	22	0
S032-1C	45	28	3
