# Supplementary material for: LGG-1/GABARAP lipidation is not required for autophagy and development in Caenorhabditis elegans
Source: eLife journal article supplement (doi:10.7554/elife.85748), 2023-07-03
Supplement: supp [file 27122021 quantifications surfaces mutants lgg-1.xlsx]

## Sheet: N2
souche	animal	niveaux d'observation	embryon ou autre		vésicules
				mitochondrie paternelle	type 0 (vésicule vide type autophagosome avec ribosomes uniquement)	type 1 (vésicule avec ribosomes et/ou organites intravésiculaires identifiables)	type 2 (vésicule avec organites intravésiculaires non identifiables)	type 3 (vésicule avec organites intravésiculaires non identifiables et contenu intracellulaire très clair et homogène)	type 4 (multi-membranaires)
N2 (4 animaux dont 2 au niveau embryons)	animal 3	niveau 1	embryon 1 à 4 cellules	1		1 (avec mitochondries paternelles)
		niveau 2	embryon 1 à 4 cellules (le même qu'au niveau 1)	2		2 (avec mitochondries paternelles)
		niveau 3	embryon 1 à 4 cellules	1		0
			embryon 1 à 4 cellules			0
			embryon 5 à 10 cellules		0	0	0	0	0
		niveau 4	embryon 5 à 10 cellules		0	0	1	0	0
			embryon 5 à 10 cellules		0	0	0	0	0
			embryon 5 à 10 cellules		0	0	0	0	0
			embryon 5 à 10 cellules		0	0	0	0	0
		niveau 5	embryon 5 à 10 cellules		0	0	0	0	0
			embryon 5 à 10 cellules		0	0	0	0	0
			embryon 5 à 10 cellules		0	0	0	0	0
			embryon 1 à 4 cellules		0	0	0	0	0
			embryon 1 à 4 cellules		0	0	0	0	0
		niveau 6	embryon 1 à 4 cellules		1	0	0	0	0
			embryon 1 à 4 cellules		0	0	0	0	0
			embryon 5 à 10 cellules		0	0	0	0	0
			embryon 5 à 10 cellules		0	0	0	0	0
	animal 4	niveau 1	embryon 1 à 4 cellules	3		1 (avec mitochondries paternelles)
		niveau 2	embryon 1 à 4 cellules	1		1 (avec mitochondries paternelles)
			embryon 1 à 4 cellules	4		1 (avec mitochondries paternelles)
		niveau 4	embryon 1 à 4 cellules		0	0	0	0	0
			embryon 1 à 4 cellules		0	0	0	0	0
			embryon 1 à 4 cellules		0	0	0	0	0
			embryon 5 à 10 cellules		1	0	0	0	0
		niveau 5	embryon 5 à 10 cellules		0	0	0	0	0
			embryon 1 à 4 cellules		0	0	0	0	0
			embryon 1 à 4 cellules		0	0	0	0	0
			embryon 1 à 4 cellules		0	0	0	0	0
		niveau 6	embryon 1 à 4 cellules		0	0	0	0	0
			embryon 1 à 4 cellules		0	0	0	0	0
			embryon 5 à 10 cellules		0	0	0	0	0

## Sheet: GA
souche	animal	niveaux d'observation	embryon ou autre		vésicules
				mitochondrie paternelle	type 0 (vésicule vide type autophagosome avec ribosomes uniquement)	type 1 (vésicule avec ribosomes et/ou organites intravésiculaires identifiables)	type 2 (vésicule avec organites intravésiculaires non identifiables)	type 3 (vésicule avec organites intravésiculaires non identifiables et contenu intracellulaire très clair et homogène)	type 4 (multi-membranaires)
GA (2 animaux coupé en longitudinal donc un seul niveau de coupe observé)	animal 1	niveau 1	embryon 1 à 4 cellules		1	4	4	3
			embryon 10 à 20 cellules	1	2	4 (dont 1 avec mitochondrie paternelle)	13 (dont 1 type invagination)	13
			embryon 10 à 20 cellules		3	14	16 (dont 1 type invagination)	13
			embryon 10 à 20 cellules		1	2	3	8
			embryon 20 à 30 cellules		0	1	2	2
			embryon avec plus de 30 cellules				1
			embryon avec plus de 30 cellules				1
			embryon avec plus de 30 cellules				1
			embryon avec plus de 30 cellules					1
			embryon 5 à 10 cellules					1
			embryon 10 à 20 cellules			1		3
		niveau 2	embryon 1 à 4 cellules			1	6	2
	animal 2	niveau 1	embryon 1 à 4 cellules	2				1
			embryon 10 à 20 cellules			1		3
		niveau 2	embryon 1 à 4 cellules				1
			embryon 5 à 10 cellules					2
			embryon 5 à 10 cellules				1
			embryon 5 à 10 cellules			1	3

## Sheet: GAstop
souche	animal	niveaux d'observation	embryon ou autre		vésicules
				mitochondrie paternelle	type 0 (vésicule vide type autophagosome avec ribosomes uniquement)	type 1 (vésicule avec ribosomes et/ou organites intravésiculaires identifiables)	type 2 (vésicule avec organites intravésiculaires non identifiables)	type 3 (vésicule avec organites intravésiculaires non identifiables et contenu intracellulaire très clair et homogène)	type 4 (multi-membranaires)
Gastop (3 animaux + 1 embryon 2 cellules)	animal 3	niveau 1	embryon 1 à 4 cellules						1
	animal 4	niveau 1	embryon 1 à 4 cellules	1		1 (avec mitochondrie paternelle)
		niveau 2	embryon 1 à 4 cellules						2
		niveau 4	embryon 1 à 4 cellules						3
		niveau 5	embryon 1 à 4 cellules					2	2
	animal 1	niveau 5	embryon 5-10 cellules						1
		niveau 6	embryon 5-10 cellules				2 (1 type invagination)
		niveau 7	embryon 1 à 4 cellules	1					2
			embryon 1 à 4 cellules						1
	embryon 2 cellules (première cryofixation)		embryon 1 à 4 cellules	1		2 (1 avec mitochondrie paternelle)			1(avec mitochondrie paternelle, accrochée à vésicule de type 1)
Gastop (3 animaux + 1 embryon 2 cellules)	animal 3	niveau 2	ovocyte						2
		niveau 3	spermathèque						1
	animal 4	niveau 3	épiderme						1
	animal 1	niveau 1	ovocyte						1
		niveau 2	ovocyte						1
			spermathèque						2
			gonade						2
		niveau 3	spermathèque						3
			gonade						1
		niveau 4	gonade						2

## Sheet: tm3489
souche	animal	niveaux d'observation	embryon ou autre		vésicules
				mitochondrie paternelle	type 0 (vésicule vide type autophagosome avec ribosomes uniquement)	type 1 (vésicule avec ribosomes et/ou organites intravésiculaires identifiables)	type 2 (vésicule avec organites intravésiculaires non identifiables)	type 3 (vésicule avec organites intravésiculaires non identifiables et contenu intracellulaire très clair et homogène)	type 4 (multi-membranaires)
lgg-1(tm3489)	animal 1	niveau 1	embryon 1 à 4 cellules	0	0	0	0	0	0
			embryon 1 à 4 cellules	0	0	0	0	0	0
			embryon 5-10 cellules	0	0	0	0	0	0
		niveau 3	embryon 1 à 4 cellules	0	0	0	0	0	0
			embryon 5-10 cellules	0	0	0	0	0	0
			embryon 10 à 20 cellules	0	0	0	0	0	0
			embryon 5-10 cellules	3	0	0	0	0	0
		niveau 5	embryon 1 à 4 cellules	0	0	0	0	0	0
			embryon 5-10 cellules	0	0	0	0	0	0
			embryon 10 à 20 cellules	0	0	0	0	0	0
			embryon 5-10 cellules	0	0	0	0	0	0
			embryon 5-10 cellules	0	0	0	0	0	0
		niveau 7	embryon 1 à 4 cellules	0	0	0	0	0	0
			embryon 5-10 cellules	0	0	0	1 (invagination)	0	0
			embryon 10 à 20 cellules	0	0	0	0	0	0
			embryon 5-10 cellules	0	0	0	0	0	0
			embryon 5-10 cellules	0	0	0	0	0	0
			embryon 5-10 cellules	0	0	0	0	0	0
		niveau 10	embryon 1 à 4 cellules	0	0	0	0	0	0
			embryon 1 à 4 cellules	0	0	0	0	0	0
			embryon 5-10 cellules	1	0	0	0	0	0
			embryon 10 à 20 cellules	0	0	0	2	0	0
			embryon avec plus de 20 cellules	0	0	0	0	0	0
			embryon 5-10 cellules	0	0	0	0	0	0
			embryon 5-10 cellules	0	0	0	0	0	0
			embryon 5-10 cellules	0	0	0	0	0	0
			embryon 5-10 cellules	0	0	0	0	0	0
			embryon 5-10 cellules	0	0	0	0	0	0
		niveau 13	embryon 1 à 4 cellules	0	0	0	0	0	0
			embryon 5-10 cellules	0	0	0	0	0	0
			embryon 10 à 20 cellules	1	0	0	0	0	0
			embryon avec plus de 20 cellules	0	0	0	0	0	0
			embryon 5-10 cellules	0	0	0	0	0	0
			embryon 5-10 cellules	0	0	0	0	0	0
			embryon 5-10 cellules	0	0	0	0	0	0
			embryon 5-10 cellules	0	0	0	0	0	0
			embryon 5-10 cellules	0	0	0	0	0	0
			embryon 5-10 cellules	0	0	0	0	0	0
			embryon 5-10 cellules	0	0	0	0	0	0
		niveau 16	embryon 5-10 cellules	0	0	0	0	0	0
			embryon 5-10 cellules	0	0	0	0	0	0
			embryon 5-10 cellules	0	0	0	0	0	0
			embryon 10 à 20 cellules	0	0	0	0	0	0
			embryon 10 à 20 cellules	0	0	0	0	0	0
			embryon avec plus de 20 cellules	0	0	0	0	0	0
			embryon 10 à 20 cellules	0	0	0	0	0	0
			embryon 10 à 20 cellules	0	0	0	0	0	0
			embryon 5-10 cellules	0	0	0	0	0	0
			embryon 5-10 cellules	0	0	0	0	0	0
			embryon 5-10 cellules	0	0	0	0	0	0
		niveau 19	embryon 5-10 cellules	1	0	0	0	0	0
			embryon 5-10 cellules	0	1 = "élongation"
			embryon 5-10 cellules	1	0	0	0	0	0
			embryon 10 à 20 cellules	0	0	0	0	0	0
			embryon 10 à 20 cellules	0	0	0	0	0	0
			embryon 5-10 cellules	0	0	0	0	0	0
			embryon 5-10 cellules	0	0	0	0	0	0
			embryon 5-10 cellules	0	0	0	0	0	0
		niveau 22	embryon 1 à 4 cellules	1	0	0	0	0	0
			embryon 5-10 cellules	0	0	0	0	1	0
			embryon 5-10 cellules	0	0	0	0	0	0
			embryon 10 à 20 cellules	0	1	0	0	0	0
			embryon 5-10 cellules	0	0	0	0	0	0
			embryon 5-10 cellules	0	0	0	0	0	0
			embryon 5-10 cellules	0	0	0	0	0	0
		niveau 25	embryon 1 à 4 cellules	0	0	0	0	0	0
			embryon 5-10 cellules	0	0	0	0	0	0
			embryon 5-10 cellules	0	0	0	0	0	0
			embryon 10 à 20 cellules	0	0	0	0	0	0
			embryon 5-10 cellules	0	0	0	0	0	0
			embryon 5-10 cellules	0	0	0	0	0	0
			embryon 5-10 cellules	0	0	0	0	0	0
	animal 2	niveau 1	embryon 1 à 4 cellules	0	0	0	0	0	0
			embryon 1 à 4 cellules	0	0	0	0	0	0
			embryon 1 à 4 cellules	0	0	0	0	0	0
			embryon 5-10 cellules	0	0	0	0	0	0
			embryon 5-10 cellules	0	0	0	0	0	0
	animal 3	niveau 1	embryon 1 à 4 cellules	0	0	0	0	0	0

## Sheet: bilan
nombre d'animaux	nombre niveaux d'observation	nombre embryon	stade embryon	souche	stade embryon	mitochondrie paternelle	mitochondrie paternelle dans vesicule		souche	stade embryon	vésicules
											type 0	type 1	type 2	type 3	type 4
2	6	7	embryons 1 à 4 cellules	N2	embryons 1 à 4 cellules	12	6		N2	embryons 1 à 4 cellules	1	6	0	0	0	très majoritairement type 1 avec exclusivement mitochondries paternelles
		5	embryon 5 à 10 cellules		embryon 5 à 10 cellules	0	0			embryon 5 à 10 cellules	1	0	1	0	0
2	2	4	embryons 1 à 4 cellules	GA	embryons 1 à 4 cellules	2	0		GA	embryons 1 à 4 cellules	1	5	11	6	0	très majoritairement type 1, 2, 3 jusqu'au stade 20 cellules
		4	embryon 5 à 10 cellules		embryon 5 à 10 cellules	0	0			embryon 5 à 10 cellules	0	1	4	3	0	1 mitochondrie paternelle dans vesicule sytde tardif
		5	embryon 10 à 20 cellules		embryon 10 à 20 cellules	1	1			embryon 10 à 20 cellules	6	22	32	40	0	très grand nombre de vésicules
		6	embryon avec plus de 20 cellules		embryon avec plus de 20 cellules	0	0			embryon avec plus de 20 cellules	0	1	5	3	0
3	6	8	embryon 1 à 4 cellules	Gastop	embryon 1 à 4 cellules	3	2		Gastop	embryon 1 à 4 cellules	0	3	0	2	12	très majoritairement type 4 dans stade précoce (et autre partie des animaux)
		2	embryon 5-10 cellules		embryon 5-10 cellules	0	0			embryon 5-10 cellules	0	0	2		1	mitochondries paternelles visibles dans vesicule type 1 et 4
3	10	7	embryon 1 à 4 cellules	tm3489	embryon 1 à 4 cellules	1	0		tm3489	embryon 1 à 4 cellules	0	0	0	0	0	pas de mitochondrie paternelle dans vésicule
		13	embryon 5-10 cellules		embryon 5-10 cellules	6	0			embryon 5-10 cellules	4	0	1	1	0	peu de vésicules
mitochondries paternelles
souche	stade embryon	totales	libres	dans une vésicule
N2	précoces	12	6	6
	tardifs	0	0	0
GA	précoces	2	2	0
	tardifs	1	0	1
Gastop	précoces	3	1	2
	tardifs	0	0	0
tm3489	précoces	1	1	0
	tardifs	6	6	0
souche	stade embryon	vésicules
		type 0	type 1	type 2	type 3	type 4
N2	embryons 1 à 4 cellules	1	6	0	0	0
	embryon 5 à 10 cellules	1	0	1	0	0
GA	embryons 1 à 4 cellules	1	5	11	6	0
	embryon 5 à 10 cellules	0	1	4	3	0
	embryon 10 à 20 cellules	6	22	32	40	0
	embryon avec plus de 20 cellules	0	1	5	3	0
Gastop	embryon 1 à 4 cellules	0	3	0	2	12
	embryon 5-10 cellules	0	0	2	0	1
tm3489	embryon 1 à 4 cellules	0	0	0	0	0
	embryon 5-10 cellules	4	0	1	1	0
2021-12-27
souche	stade embryon	vésicules						souche	stade embryon	vésicules
		type 0	type 1	type 2	type 3	type 4	surface (µm2)			type 0	type 1	type 2	type 3	type 4
N2	embryons 1 à 4 cellules	1	6	0	0	0	12350	N2	embryons 1 à 4 cellules	8.09717e-05	0.00048583	0	0	0
	embryon 5 à 10 cellules	1	0	1	0	0	11895		embryon 5 à 10 cellules	8.40689e-05	0	8.40689e-05	0	0
GA	embryons 1 à 4 cellules	1	5	11	6	0	2600	GA	embryons 1 à 4 cellules	0.000384615	0.00192308	0.00423077	0.00230769	0
	embryon 5 à 10 cellules	0	1	4	3	0	3660		embryon 5 à 10 cellules	0	0.000273224	0.0010929	0.000819672	0
Gastop	embryon 1 à 4 cellules	0	3	0	2	12	5200	Gastop	embryon 1 à 4 cellules	0	0.000576923	0	0.000384615	0.00230769
	embryon 5-10 cellules	0	0	2	0	1	1830		embryon 5-10 cellules	0	0	0.0010929	0	0.000546448
tm3489	embryon 1 à 4 cellules	0	0	0	0	0	9100	tm3489	embryon 1 à 4 cellules	0	0	0	0	0
	embryon 5-10 cellules	4	0	1	1	0	58560		embryon 5-10 cellules	6.8306e-05	0	1.70765e-05	1.70765e-05	0

## Sheet: impression quantif normalisées
2021-12-27
souche	stade embryon	vésicules						souche	stade embryon	vésicules
		type 0	type 1	type 2	type 3	type 4	surface (µm2)			type 0	type 1	type 2	type 3	type 4
N2	embryons 1 à 4 cellules	1	6	0	0	0	12350	N2	embryons 1 à 4 cellules	8.09717e-05	0.00048583	0	0	0
	embryon 5 à 10 cellules	1	0	1	0	0	11895		embryon 5 à 10 cellules	8.40689e-05	0	8.40689e-05	0	0
GA	embryons 1 à 4 cellules	1	5	11	6	0	2600	GA	embryons 1 à 4 cellules	0.000384615	0.00192308	0.00423077	0.00230769	0
	embryon 5 à 10 cellules	0	1	4	3	0	3660		embryon 5 à 10 cellules	0	0.000273224	0.0010929	0.000819672	0
Gastop	embryon 1 à 4 cellules	0	3	0	2	12	5200	Gastop	embryon 1 à 4 cellules	0	0.000576923	0	0.000384615	0.00230769
	embryon 5-10 cellules	0	0	2	0	1	1830		embryon 5-10 cellules	0	0	0.0010929	0	0.000546448
tm3489	embryon 1 à 4 cellules	0	0	0	0	0	9100	tm3489	embryon 1 à 4 cellules	0	0	0	0	0
	embryon 5-10 cellules	4	0	1	1	0	58560		embryon 5-10 cellules	6.8306e-05	0	1.70765e-05	1.70765e-05	0
