# Supplementary material for: LGG-1/GABARAP lipidation is not required for autophagy and development in Caenorhabditis elegans
Source: eLife journal article supplement (doi:10.7554/elife.85748), 2023-07-03
Supplement: supp [file Bilan comptage hsp-6GFP .xlsx]

## Sheet: Feuil1
hsp-6::GFP
pp65	1C			2C			4C			6C			8C		10C		12C			16C		20C			25-30			50C
5921	21		5919	23		5917	26		5926	8		5936	19	5933	10		5		5924	0	5937	7		5938	0		5940	0
5918	20			24		5922	23		5836	33		5943	8	5942	11		0		5927	0	5945	6		5938	0		5940	0
5931	35		5941	38		5925	5										0		5950	13	5945	0		5948	0		5947	0
5929	20					5928	22										0				5952	0		5951	0		5949	1
5932	53					5930	37
						5833	36
						5939	52
Moyenne	29.8			28.3333			28.7143			20.5			13.5		10.5		1.25			4.33333		3.25			0			0.25
n	5			3			5			2			2		2		4			4		4			4			4
n précoces embryos de 1 à4C	13							n précoces embryos de 6 à410C	6							n précoces embryos de 12 à20 C	20
moyenne précoces embryos de 1 à4C	28.9492							moyenne précoces embryos de 1 à4C	14.8333							moyenne précoces embryos de 1 à4C	1.81667
N2	1C			2C			4C			6C			8C		10C		12C			16C		20C			25-30			50C
5881	29		5991	36		5881	25		5885	19		5902	0		0		0		S18037	0				5954	0			0
5888	36		5992	32		5884	28		5909	9		5907	0		0					0				18040	0			0
5889	33		5893	30		5895	20		5911	8		5916	10		0										0			0
5890	39		5894	26		5897	15		5912	0					2										0			0
			5998	20		5899	12		5913	0															0			0
			5901	12		5903	19		5915	11															0
						5904	19
						5905	10
						5906	14
						5908	16
						5910	12
						5914	13
Moyenne	34.25			26			16.9167			7.83333			3.33333		0.5		0			0					0			0
n	4			6			12			6			3		4		1			2		0			6			5
n précoces embryos de 1 à4C	22							n précoces embryos de 6 à410C	13							n précoces embryos de 12 à20 C	14
moyenne précoces embryos de 1 à4C	25.7222							moyenne précoces embryos de 1 à4C	3.88889							moyenne précoces embryos de 1 à4C	0
LGG-1 -(tm3489)	1C			2C			4C			6C			8C		10C		12C			16C		20C			25-30			50C
5946	20		5943	19		5945	6		5978-3	21				5953	33	5961	34		5950	26	5944	19		5947	18		5955	18
5951	58		5952	21		5962-1	36							5960	33	5963	12		5953-2	26	5958	30		5976-2	11		5967	16
5954	36		5970	17										5971	45	5976-1	26		5956	49	5980	39
5962-2	40		5978-1	20										5972	53				5957	33
5974	30		5983	36										5979	17				5976	20
																			5878-2	11
																			5981	40
																			5982	27
Moyenne	36.8			22.6			21			21					36.2		24			29		29.3333			14.5			17
n	5			5			2			1			0		5		3			8		3			2			2
n précoces embryos de 1 à4C	12							n précoces embryos de 6 à410C	6							n précoces embryos de 12 à20 C	18
moyenne précoces embryos de 1 à4C	26.8							moyenne précoces embryos de 1 à4C	28.6							moyenne précoces embryos de 1 à4C	22.7667
Males Spe-11-hsp6-GFP / + x lgg-1(GA);lgg-2(tm5755)
	1C			2C			4C			6C			8C		10C		12C			16C		20C			25-30				50C			100C		150C
5893.1	27		5892	47		5891	22		5899-3	26		5894	18	5902	34		12		5899-1	16	5899-2	8		5900	1			5930	12		5895	12	5913	0
5903	43		5896	45		5897	23		5911	34		5928	20	5904	38	5906	17		5905	0	5916	14		5908	3			5936	8		5910	0
5919	5		5898	27		5912	27		5926	2		5933	43	5924	12	5907	17				5921	23		5918	7						5913	0
5922	37		5901	41		5917	21					5938	25			5937					5931	20		5920	3
5934	47		5909	35		5925	9																	5923	13
			5914	16		5927	24																	5932	5
																								5935	7
Moyenne	31.8			35.1667			21			20.6667			26.5		28		15.3333			8		16.25			5.57143				10			4		0
n	5			6			6			3			4		3		3			2		4			7				2			3		1
n précoces embryos de 1 à4C	17							n précoces embryos de 6 à410C	3.33333							n précoces embryos de 12 à20 C	8.45068
moyenne précoces embryos de 1 à4C	29.3222							moyenne précoces embryos de 1 à4C	25.0556							moyenne précoces embryos de 1 à4C	21
Spe-11::hsp6::GFP x GASTOP
B&C 210- 2245
1 C			2 C				4C			6C			8C		10C		12C			15C		20C			25C-30
7265	15		7264	31		7265	15		7273	16		7285	12	7266	13	7266	13		7266	16	7270	15		7264	25
7267	32		7265	23		7274	15		7274	8				7269	6	7271	25		7273	19	7276	12		7270	15
7274	28		7283	18		7284	21		7274	19				7283	10	7273	6		7274	12	7277	17		7273	12
7283	15		7283	23					7280	32									7885	2	7280	13		7277	8
									7285	19											7290	5		7285	5
																								7272	17
																								7285	8
Moyenne	22.5			23.75			17			18.8			12		9.66667		14.6667			12.25		12.4			12.8571				#DIV/0!			#DIV/0!		#DIV/0!
n	4			4			3			5			1		3		3			4		5			6				0			0		0
	11							n précoces embryos de 6 à410C	3							n précoces embryos de 12 à20 C	#DIV/0!
	21.0833							moyenne précoces embryos de 1 à4C	13.4889							moyenne précoces embryos de 1 à4C	18
