# Supplementary material for: LGG-1/GABARAP lipidation is not required for autophagy and development in Caenorhabditis elegans
Source: eLife journal article supplement (doi:10.7554/elife.85748), 2023-07-03
Supplement: supp [file bilan fertilit N2-GA-GASTOP.xlsx]

## Sheet: Feuil1
Fertilité - MANIP1	nbr d'embryons pondus
2019	jour 1	jour 2 matin	jour 2 soir	jour 3 matin	jour 3 soir	total embryons pondus
N2- b1 n=5	261	341	247	321	248	1418
N2-b2 n=5	254	356	264	318	254	1446
N2-b3 n=5	258	342	236	304	210	1350
N2-b4 n=5	246	354	231	319	246	1396
total heure	10h	15h	10h	13h	10h
total embryons pondus	1019	1393	978	1262	958	1402.5	280.5
nombre de survivants	Jour1-->jour3	Jour2matin-->jour4	jour2soir--> jour5	jour3matin--> jour6	jour3soir-->jour7
N2- b1 n=5	258	321	243	317	242	1381
N2-b2 n=5	244	354	261	312	248	1419
N2-b3 n=5	256	340	228	298	204	1326
N2-b4 n=5	240	349	225	319	222	1355
total embryons pondus	998	1364	957	1246	916	1370.25	274.05
% de survie	97.9392	97.9182	97.8528	98.7322	95.6159	97.6116	moyenne
Fertilité - MANIP1	nbr d'embryons pondus
2019	jour 1	jour 2 matin	jour 2 soir	jour 3 matin	jour 3 soir	total embryons pondus
lgg-1(G116A)- b1 n=5	282	332	247	310	251	1422
lgg-1(G116A-b2 n=5	245	358	255	323	264	1445
lgg-1(G116A-b3 n=5	231	331	269	323	243	1397
lgg-1(G116A-b4 n=5	252	356	262	284	256	1410
total heure	10h	15h30	10h30	13h30	10h30
total embryons pondus	1010	1377	1033	1240	1014	1418.5	283.7
nombre de survivants	Jour1-->jour3	Jour2matin-->jour4	jour2soir--> jour5	jour3matin--> jour6	jour3soir-->jour7
lgg-1(G116A)- b1 n=5	278	328	232	308	249	1395
lgg-1(G116A-b2 n=5	244	355	254	299	250	1402
lgg-1(G116A-b3 n=5	226	321	256	295	233	1331
lgg-1(G116A-b4 n=5	249	329	257	304	252	1391
total embryons pondus	997	1333	999	1206	984	1379.75	275.95
% de survie	98.7129	96.8046	96.7086	97.2581	97.0414	97.3051	moyenne
Fertilité - MANIP2
2019	jour 1	jour 2 matin	jour 2 soir	jour 3 matin	jour 3 soir	total embryons pondus
N2- b1 n=5	221	354	248	318	200	1341
N2-b2 n=5	202	347	264	298	231	1342
N2-b3 n=5	198	333	212	300	201	1244
N2-b4 n=5	213	350	245	339	226	1373
total heure	10h	15h	10h	13h	10h	1325	265
total embryons pondus	834	1384	969	1255	858
nombre de survivants	Jour1-->jour3	Jour2matin-->jour4	jour2soir--> jour5	jour3matin--> jour6	jour3soir-->jour7
N2- b1 n=5	212	339	240	316	183	1290
N2-b2 n=5	200	321	251	295	228	1295
N2-b3 n=5	188	315	210	288	198	1199
N2-b4 n=5	198	342	235	321	200	1296
total embryons pondus	798	1317	936	1220	809	1270	254
% de survie	95.6835	95.159	96.5944	97.2112	94.289	95.7874	moyenne
Fertilité - MANIP2
2019	jour 1	jour 2 matin	jour 2 soir	jour 3 matin	jour 3 soir	total embryons pondus
lgg-1(G116AG117*)- b1 n=5	198	322	244	384	219	1367
lgg-1(G116AG117*)-b2 n=5	188	337	233	348	225	1331
lgg-1(G116AG117*)-b3 n=5	219	321	278	323	232	1373
lgg-1(G116AG117*)-b4 n=5	225	389	282	288	211	1395
total heure	10h	15h	10h	13h	10h	1366.5	273.3
total embryons pondus	830	1369	1037	1343	887
nombre de survivants	Jour1-->jour3	Jour2matin-->jour4	jour2soir--> jour5	jour3matin--> jour6	jour3soir-->jour7
N2- b1 n=5	198	320	227	374	202	1321
N2-b2 n=5	180	321	241	321	220	1283
N2-b3 n=5	211	314	246	315	221	1307
N2-b4 n=5	221	387	268	256	209	1341
total embryons pondus	810	1342	982	1266	852	1313	262.6
% de survie	97.5904	98.0278	94.6962	94.2666	96.0541	96.127	moyenne
