# Supplementary material for: LGG-1/GABARAP lipidation is not required for autophagy and development in Caenorhabditis elegans
Source: eLife journal article supplement (doi:10.7554/elife.85748), 2023-07-03
Supplement: supp [file Bilan longevit donne brute GASTOP.xlsx]

## Sheet: Feuil1
LONGEVITE - AOUT 2019
Round 1	J0	J1	J2	J3	J4	J5	J6	J7	J8	J9	J10	J11	J12	J13	J14	J15	J16	J17	J18	J19	J20	J21
lgg-1(G116AG117STOP)	2019-08-04	2019-08-05	2019-08-06	2019-08-07	2019-08-08	2019-08-09	2019-08-10	2019-08-11	2019-08-12	2019-08-13	2019-08-14	2019-08-15	2019-08-16	2019-08-17	2019-08-18	2019-08-19	2019-08-20	2019-08-21	2019-08-22	2019-08-23	2019-08-24	2019-08-25
b1	10	9	9	9	9	9	9	8	8	7	6	6	6	6	6	6	2	0	0	0	0	0
b2	10	10	9	9	9	9	9	9	9	9	8	8	7	7	7	7	4	4	1	0	0	0
b3	10	10	10	9	9	9	7	7	7	6	6	6	5	5	5	4	2	1	0	0	0	0
b4	10	10	10	8	8	8	8	7	7	7	5	5	5	5	5	5	4	3	0	0	0	0
b5	10	9	8	8	8	8	8	8	8	8	7	5	5	5	5	5	2	1	1	1	1	0
b6	10	10	9	9	7	7	7	6	6	6	6	6	6	6	6	6	6	4	3	1	1	0
b7	10	10	10	10	10	8	7	7	7	7	7	7	7	6	6	6	5	3	1	0	0	0
b8	10	10	9	9	9	9	9	9	9	9	7	7	7	7	7	4	3	1	1	0	0	0
b9	10	9	9	9	9	7	7	7	7	8	7	7	7	6	6	5	1	1	0	0	0	0
b10	10	10	10	10	10	10	10	10	10	10	10	10	10	9	9	9	5	4	3	2	0	0
b11	15	14	13	12	12	12	12	12	12	12	12	12	11	11	10	9	6	4	0	0	0	0
n	115	111	106	102	100	96	93	90	90	89	81	79	76	73	72	66	40	26	10	4	2	0
nb mort ev 1 /par J	0	0	0	0	0	1	0	2	0	0	3	1	0	2	0	0	16	14	7	3	1	1
nb de mort add ev 1	0	0	0	0	0	1	1	3	3	3	6	7	7	9	9	9	25	39	46	49	50	51
nb d'evenment 0	0	4	5	4	2	3	3	1	0	1	5	1	3	1	1	1	0	2	1	1	1	1
nb evenement 0 add	0	4	9	13	15	18	21	22	22	23	28	29	32	33	34	35	35	37	38	39	40	41
% de survie	100	100	100	100	100	98.9691	98.9362	96.7742	96.7742	96.7391	93.1034	91.8605	91.5663	89.0244	88.8889	82.5	50	33.3333	12.987	5.26316	2.66667	0
Observations				petite conta
	J0	J1	J2	J3	J4	J5	J6	J7	J8	J9	J10	J11	J12	J13	J14	J15	J16	J17	J18	J19	J20	J21	J22	J23
N2	2019-08-04	2019-08-05	2019-08-06	2019-08-07	2019-08-08	2019-08-09	2019-08-10	2019-08-11	2019-08-12	2019-08-13	2019-08-14	2019-08-15	2019-08-16	2019-08-17	2019-08-18	2019-08-19	2019-08-20	2019-08-21	2019-08-22	2019-08-23	2019-08-24	2019-08-25	2019-08-26	2019-08-27
b1	10	10	10	10	10	10	10	9	9	9	9	9	9	9	8	7	7	6	6	4	4	4	2	1
b2	10	10	10	10	10	10	9	9	9	9	9	9	9	9	9	8	8	6	6	6	5	3	2	1
b3	10	9	9	9	9	10	9	9	9	9	9	9	9	8	8	8	7	8	5	3	3	2	2	1
b4	10	10	9	9	9	9	9	9	9	9	9	9	7	6	6	4	3	3	3	3	3	3	3	0
b5	10	9	8	8	8	8	8	8	7	8	8	8	8	8	8	8	8	8	8	7	5	4	2	0
b6	10	10	10	10	10	9	9	8	8	8	8	8	8	7	7	7	7	7	7	7	5	4	1	0
b7	10	10	10	10	10	10	8	10	8	8	8	8	8	7	7	7	6	6	4	4	4	3	1	1
b8	10	10	10	10	10	10	10	10	9	9	8	6	5	5	4	4	4	4	3	3	3	2	1	1
b9	10	10	10	10	9	9	9	8	8	8	8	0	0	0	0	0	0	0	0	0	0	0	0	0
b10	10	10	10	10	10	10	10	10	9	8	8	7	7	7	7	7	6	6	3	3	2	2	1	1
b11	15	14	14	14	14	14	14	14	14	13	13	13	12	11	11	11	11	8	6	4	4	2	1	1
n	115	112	110	110	109	109	105	104	99	98	97	86	82	77	75	71	67	62	51	44	38	29	16	7
nb mort ev 1 /par J	0	0	0	0	0	0	0	0	1	1	0	1	2	3	1	3	4	6	8	6	5	9	12	9
nb de mort add ev 1	0	0	0	0	0	0	0	0	1	2	2	3	5	8	9	12	16	22	30	36	41	50	62	71
nb d'evenment 0	0	3	2	0	1	0	4	1	4	1	1	8	2	2	1	1	0	0	3	1	1	0	0	0
nb evenement 0 add	0	3	5	5	6	6	10	11	15	16	17	25	27	29	30	31	31	31	34	35	36	36	36	36
% de survie	100	100	100	100	100	100	100	100	99	98.9899	98.9796	95.5556	93.1818	89.5349	88.2353	84.5238	79.7619	73.8095	62.963	55	48.1013	36.7089	20.2532	8.86076
									J8	J9	J10	J11	J12	J13	J14	J15	J16	J17	J18	J19	J20	J21
lgg-1(G116A)	2019-08-04	2019-08-05	2019-08-06	2019-08-07	2019-08-08	2019-08-09	2019-08-10	2019-08-11	2019-08-12	2019-08-13	2019-08-14	2019-08-15	2019-08-16	2019-08-17	2019-08-18	2019-08-19	2019-08-20	2019-08-21	2019-08-22	2019-08-23	2019-08-24	2019-08-25
b1	10	10	10	10	10	10	10	10	10	10	9	9	9	8	8	8	8	7	6	5	5	3
b2	10	10	9	9	9	9	8	7	7	7	6	6	5	5	5	4	3	2	2	0	0	0
b3	10	10	10	10	10	10	10	10	10	10	9	9	8	8	8	8	8	6	4	4	3	2
b4	10	10	9	9	8	8	8	7	7	7	6	4	4	3	3	3	2	2	2	2	2	0
b5	10	10	10	10	9	9	9	8	8	8	6	6	6	6	6	5	4	4	4	4	4	4
b6	10	10	10	10	10	10	10	9	8	7	6	6	6	5	5	6	5	4	4	4	4	4
b7	10	10	10	10	10	10	10	9	7	6	6	6	6	3	3	2	2	2	2	2	1	1
b8	10	10	10	10	10	10	9	9	9	9	8	8	7	6	5	5	5	5	5	5	4	4
b9	10	10	10	10	9	7	7	8	8	8	8	8	8	8	7	6	5	5	5	3	3	0
b10	10	10	10	10	10	10	8	8	8	8	8	8	8	8	5	4	4	4	3	3	3	1
b11	16	16	16	14	14	13	10	10	9	7	7	7	7	7	6	6	5	5	5	5	5	3
n	116	116	114	112	109	106	99	95	91	87	79	77	74	67	61	57	51	46	42	37	34	22
nb mort ev 1 /par J	0	0	0	0	0	1	0	1	0	1	1	1	0	5	1	3	3	3	4	4	3	4
nb de mort add ev 1	0	0	0	0	0	1	1	1	1	2	3	4	4	9	10	13	16	19	23	27	30	34
nb d'evenment 0	0	0	2	2	3	2	7	3	4	3	6	1	2	2	5	1	4	2	0	0	0	1
nb evenement 0 add	0	0	2	4	7	9	16	19	23	26	32	33	35	37	42	43	47	49	49	49	49	50
% de survie	100	100	100	100	100	99.0654	99	97.9381	97.8495	96.6667	94.0476	92.7711	91.358	84.8101	82.4324	78.0822	73.913	68.6567	62.6866	55.2239	50.7463	33.3333
	lgg-1(tm3489)			lgg-1(tm3489)			lgg-1(tm3489)			lgg-1(tm3489)			lgg-1(tm3489)	lgg-1(tm3489)	lgg-1(tm3489)	lgg-1(tm3489)	lgg-1(tm3489)	lgg-1(tm3489)
lgg-1(tm3489)	2019-08-04	2019-08-05	2019-08-06	2019-08-07	2019-08-08	2019-08-09	2019-08-10	2019-08-11	2019-08-12	2019-08-13	2019-08-14	2019-08-15	2019-08-16	2019-08-17	2019-08-18	2019-08-19	2019-08-20	2019-08-21
b1	10	10	10	9	9	9	9	9	9	9	8	8	6	3	2	0	0	0
b2	10	9	9	9	9	9	9	9	9	9	9	6	8	4	0	0	0	0
b3	10	10	9	9	9	9	9	9	9	9	9	9	4	3	1	1	0	0
b4	10	10	8	8	8	8	8	8	8	6	5	5	4	4	2	0	0	0
b5	10	10	8	8	8	8	8	8	8	7	8	7	5	4	4	1	0	0
n	40	39	36	35	35	35	35	35	35	33	31	28	22	14	5	1	0	0
nb mort ev 1 /par J	0	0	0	0	0	0	0	1	2	1	2	3	6	7	1	7	6	0
nb de mort add ev 1	0	0	0	0	0	0	0	1	3	1	3	6	12	19	20	27	33	33
nb d'evenment 0	0	1	3	1	0	0	0	0	0	1	0	0	0	1	1	0	0	0
nb evenement 0 add	0	1	4	5	5	5	5	5	5	6	6	6	6	7	8	8	8	8
% de survie	100	100	100	100	100	100	100	100	100	97.0588	91.1765	82.3529	64.7059	42.4242	15.625	3.125	0	0
	J0	J1	J2	J3	J4	J5	J6	J7	J8	J9	J10	J11	J12	J13	J14	J15	J16	J17	J18	J19	J20	J21	J22	J23	J24	J25	J26	J27	J28
% de survie N2	100	100	100	100	100	100	100	100	99	98.9899	98.9796	95.5556	93.1818	89.5349	88.2353	84.5238	82.4	79.7619	73.8095	62.963	55	48.1013	38	36.45	30.5	4.42	4.5	3	1
% de survie G116A	100	100	100	100	100	99.0654	99	97.9381	97.8495	96.6667	94.0476	92.7711	91.358	84.8101	82.4324	78.0822	77.8	73.913	68.6567	62.6866	55.2239	50.7463	43.8	28.6	20.25	8.8	4	2	1
% de survie G116AG117STOP	100	100	100	100	100	98.9691	98.9362	96.7742	96.7742	96.7391	93.1034	91.8605	91.5663	89.0244	88.8889	82.5	50	33.3333	9.3	5.26316	2.66667	0
% de survie tm3489	100	100	100	100	100	100	100	100	100	97.0588	91.1765	82.3529	64.7059	42.4242	15.625	3.125	0	0
