# Supplementary material for: LGG-1/GABARAP lipidation is not required for autophagy and development in Caenorhabditis elegans
Source: eLife journal article supplement (doi:10.7554/elife.85748), 2023-07-03
Supplement: supp [file bilan manip IF GABARAP-LGG-1 nombre de point.xlsx]

## Sheet: Feuil1
						pp65	C		pp66	C
						0	2		0	2
						0	30		0	2
						0	4		0	1
161213_22_gabarap_1-D20-G50-DsRed50 embryon en haut à gauche						0	2		0	4
	5	environ 80c ?				1	8		0	2
	3	4C				0	4		0	4
	4	environ 50 C				1	250C		0	250
	0	1C				1	300		0	350
	20	environ 150 C				1	15		2	350
	4	120				0	2
	0	8				1	8
	6	130				3	50
	5	150				2	50
	5	150				0	1
	3	150				0	2
	1	250				0	1
	0	80				0	1
	0	1				0	4
						1	12
nbr de points/ embryons manip anticorps GABARAP
	N2	pp65	pp141	pp22	pp65	pp66	pp142
	689	0	4	5	0	0	0
	806	0	3	3	0	0	1
	70	0	0	4	0	0	0
	512	0	3	0	0	0	0
	68	1	0	20	1	0	0
	223	0	0	4	0	0	0
	198	1	4	0	1	0	0
	302	1	0	6	1	0	0
	410	1	3	5	1	2	2
	692	0	2	5	0		2
	120	1	3	3	1		0
	117	3	3	1	3		7
	126	2	2	0	2		0
	111	0	3	0	0		2
	215	0	0		0
	113	0	1		0
	81	0	0		0
	228	1	0		1
	138		0
	57		0
	147		4
	92
	65
n	23	18	21	14	18	9	14
moyenne	242.609	0.611111	1.66667	4	0.611111	0.222222	1
	N2
