# Supplementary material for: LGG-1/GABARAP lipidation is not required for autophagy and development in Caenorhabditis elegans
Source: eLife journal article supplement (doi:10.7554/elife.85748), 2023-07-03
Supplement: supp [file bilan nombre de points LGG-2 .xlsx]

## Sheet: N2 aires 
Aire des points LGG-2
N2- 1	N2- 2	N2- 3	N2- 4		Area	0.025-0,099	0.1 -0.19	0.20-0.29	0.30-0.39	0.40-0.49	0.50-0.59	0.60-0.69	0.70-0.79	0.80-0.89	0.90-0.99	entre 1 et 1,99	entre 2 et 2,99	entre 3 et 3,99	entre 4 et 4,99	>5
0.008	0.008	0.008	0.008		N2-1	3	3	2	0	0	0	0	1	3	0	0	1	0	0	0
0.008	0.008	0.008	0.008		N2-2	8	5	5	0	1	1	0	0	0	0	0	0	1	0	0
0.008	0.008	0.008	0.008		N2-3	3	0	0	1	1	1	0	0	0	1	0	0	1	0	0
0.017	0.008	0.008	0.008		N2-4	4	2	4	0	3	0	1	0	0	0	0	0	1	0	0
0.017	0.008	0.008	0.008
0.017	0.008	0.008	0.008
0.017	0.008	0.008	0.008
0.017	0.008	0.017	0.008
0.025	0.008	0.017	0.008
0.042	0.008	0.034	0.008
0.042	0.008	0.042	0.008
0.109	0.008	0.059	0.008
0.134	0.008	0.361	0.008
0.168	0.008	0.429	0.008
0.202	0.017	0.529	0.008
0.269	0.017	0.992	0.017
0.790	0.017	3.554	0.017
0.807	0.017		0.034
0.882	0.017		0.042
0.891	0.017		0.109
2.95	0.017		0.134
	0.017		0.200
	0.025		0.201
	0.025		0.252
	0.025		0.223
	0.042		0.459
	0.042		0.470
	0.042		0.481
	0.059		0.68
	0.092		3.89
	0.126
	0.134
	0.134
	0.151
	0.176
	0.218
	0.235
	0.235
	0.294
	0.294
	0.496
	0.555
	3.420

## Sheet: GA aires 
	GA.1	GA.2	GA.3	GA.4	GA.5	GA.6	GA.7	GA.8	GA.9			Area	0.025-0,099	0.1 -0.19	0.20-0.29	0.30-0.39	0.40-0.49	0.50-0.59	0.60-0.69	0.70-0.79	0.80-0.89	0.90-0.99	entre 1 et 1,99	entre 2 et 2,99	entre 3 et 3,99	entre 4 et 4,99	>5
	0.067	0.008	0.008	0.008	0.008	0.008	0.008	0.008	0.008			GA-1	3	8	13	17	3	4	0	1	1	1	1	0	0	0	0
	0.067	0.008	0.008	0.008	0.008	0.008	0.008	0.008	0.008			GA-2	8	12	4	3	0	2	1	0	0	0	0	0	0	0	0
	0.067	0.008	0.008	0.008	0.008	0.008	0.008	0.008	0.008			GA-3	21	2	2	0	1	2	1	0	0	0	2	0	0	0	0
	0.126	0.017	0.008	0.008	0.008	0.008	0.008	0.008	0.008			GA-4	11	7	4	1	1	0	1	1	0	0	1	0	0	0	0
	0.134	0.034	0.008	0.008	0.008	0.008	0.008	0.008	0.008			GA-5	10	9	5	3	2	2	1	2	0	0	0	0	0	0	0
	0.134	0.034	0.008	0.008	0.008	0.017	0.008	0.008	0.008			GA-6	13	11	5	1	2	1	1	1	1	1	0	1	0	0	0
	0.143	0.042	0.008	0.008	0.008	0.017	0.008	0.008	0.008			GA-7	5	4	2	1	1	1	1	2	0	1	1	0	2	0	0
	0.160	0.042	0.008	0.017	0.017	0.017	0.017	0.017	0.008			GA.8	7	2	2	0	1	1	0	2	0	0	1	0	0	0	0
	0.168	0.050	0.017	0.025	0.017	0.025	0.017	0.017	0.008			GA.9	18	10	5	1	2	0	1	0	0	1	5	0	0	0	0
	0.168	0.059	0.017	0.025	0.017	0.025	0.017	0.017	0.008
	0.193	0.059	0.025	0.025	0.025	0.025	0.017	0.017	0.017
	0.210	0.084	0.025	0.034	0.034	0.025	0.025	0.025	0.017
	0.244	0.101	0.025	0.034	0.034	0.034	0.025	0.042	0.017
	0.244	0.101	0.034	0.034	0.042	0.034	0.025	0.042	0.034
	0.252	0.118	0.042	0.042	0.050	0.042	0.025	0.042	0.034
	0.269	0.126	0.042	0.059	0.059	0.050	0.042	0.067	0.042
	0.277	0.134	0.042	0.067	0.059	0.050	0.042	0.084	0.042
	0.277	0.143	0.042	0.076	0.076	0.059	0.042	0.084	0.042
	0.277	0.151	0.042	0.076	0.084	0.059	0.050	0.176	0.042
	0.277	0.160	0.042	0.101	0.092	0.059	0.050	0.185	0.042
	0.286	0.160	0.050	0.101	0.092	0.067	0.118	0.235	0.042
	0.286	0.160	0.050	0.109	0.101	0.067	0.126	0.277	0.050
	0.294	0.160	0.050	0.126	0.101	0.076	0.134	0.412	0.059
	0.294	0.176	0.059	0.143	0.101	0.084	0.134	0.437	0.067
	0.302	0.202	0.067	0.168	0.109	0.092	0.168	0.479	0.067
	0.302	0.218	0.076	0.193	0.143	0.109	0.235	0.538	0.076
	0.302	0.235	0.076	0.218	0.160	0.109	0.252	0.546	0.076
	0.311	0.244	0.076	0.218	0.168	0.118	0.387	0.781	0.076
	0.319	0.302	0.076	0.244	0.185	0.118	0.471	0.790	0.084
	0.319	0.311	0.076	0.286	0.193	0.118	0.538	1.076	0.092
	0.319	0.361	0.092	0.319	0.202	0.118	0.597		0.092
	0.328	0.571	0.101	0.471	0.218	0.134	0.639		0.101
	0.328	0.571	0.143	0.605	0.235	0.160	0.723		0.101
	0.336	0.655	0.176	0.765	0.252	0.160	0.739		0.109
	0.336		0.202	1.790	0.286	0.168	0.958		0.109
	0.345		0.210		0.319	0.193	1.949		0.126
	0.345		0.412		0.353	0.218	3.571		0.134
	0.353		0.529		0.361	0.235	3.739		0.143
	0.361		0.571		0.403	0.252			0.151
	0.370		0.672		0.445	0.277			0.151
	0.378		1.025		0.504	0.294			0.185
	0.429		1.302		0.580	0.395			0.202
	0.454				0.689	0.403			0.227
	0.471				0.731	0.462			0.260
	0.496				0.739	0.513			0.277
	0.513					0.639			0.277
	0.563					0.765			0.319
	0.563					0.840			0.471
	0.580					0.975			0.479
	0.739					2.521			0.681
	0.891								0.916
	0.975								1.076
	1.092								1.302
	Area								1.302
									1.647
									1.941
									2.017
									2.378

## Sheet: GASTOP aires
GASTOP.1	GASTOP.2	GASTOP.3	GASTOP.4	GASTOP.5		Area	0.025-0,099	0.1 -0.19	0.20-0.29	0.30-0.39	0.40-0.49	0.50-0.59	0.60-0.69	0.70-0.79	0.80-0.89	0.90-0.99	entre 1 et 1,99	entre 2 et 2,99	entre 3 et 3,99	entre 4 et 4,99	>5
0.008	0.008	0.008	0.008	0.008		GASTOP 1	16	2	2	3	3	1	2	1	2	1	6	0	0	0	0
0.008	0.008	0.008	0.008	0.008		GASTOP 2	15	5	2	2	2	4	0	3	0	1	6	7	2	2	0
0.008	0.008	0.008	0.008	0.008		GASTOP 3	80	3	3	3	1	1	0	1	0	1	10	0	2	1	3
0.008	0.008	0.008	0.008	0.008		GASTOP 4	8	8	6	2	4	0	0	2	1	0	1	2	1	1	2
0.008	0.008	0.008	0.008	0.008		GASTOP 5	13	5	3	2	2	2	0	0	1	0	3	6	3	0	1
0.008	0.008	0.008	0.008	0.008
0.008	0.008	0.008	0.008	0.008
0.008	0.008	0.008	0.008	0.008
0.008	0.008	0.008	0.008	0.008
0.008	0.008	0.008	0.008	0.008
0.008	0.008	0.008	0.008	0.008
0.008	0.008	0.008	0.008	0.008
0.008	0.008	0.008	0.008	0.008
0.008	0.008	0.008	0.008	0.008
0.008	0.008	0.008	0.008	0.008
0.008	0.008	0.008	0.008	0.008
0.008	0.008	0.008	0.008	0.008
0.008	0.008	0.008	0.008	0.008
0.008	0.008	0.008	0.008	0.008
0.008	0.008	0.008	0.008	0.008
0.008	0.008	0.008	0.008	0.008
0.008	0.008	0.008	0.008	0.008
0.008	0.008	0.008	0.008	0.008
0.008	0.008	0.008	0.008	0.008
0.008	0.008	0.008	0.008	0.008
0.008	0.008	0.008	0.008	0.008
0.008	0.008	0.008	0.008	0.008
0.008	0.008	0.008	0.008	0.008
0.008	0.008	0.008	0.008	0.008
0.008	0.008	0.008	0.008	0.008
0.008	0.008	0.008	0.008	0.008
0.008	0.008	0.008	0.008	0.008
0.008	0.008	0.008	0.008	0.008
0.008	0.008	0.008	0.008	0.008
0.017	0.008	0.008	0.017	0.008
0.017	0.008	0.008	0.017	0.008
0.017	0.008	0.008	0.017	0.008
0.017	0.008	0.008	0.017	0.008
0.025	0.008	0.008	0.017	0.008
0.025	0.008	0.008	0.017	0.008
0.025	0.008	0.008	0.025	0.008
0.025	0.008	0.008	0.025	0.008
0.025	0.008	0.008	0.025	0.008
0.025	0.008	0.008	0.025	0.008
0.025	0.008	0.008	0.034	0.008
0.042	0.008	0.008	0.076	0.008
0.042	0.008	0.008	0.092	0.008
0.050	0.008	0.008	0.092	0.008
0.050	0.008	0.008	0.101	0.008
0.050	0.008	0.008	0.101	0.008
0.059	0.008	0.008	0.109	0.008
0.067	0.008	0.008	0.109	0.008
0.076	0.008	0.008	0.118	0.017
0.076	0.008	0.008	0.143	0.017
0.118	0.008	0.008	0.176	0.017
0.134	0.008	0.008	0.185	0.017
0.244	0.008	0.008	0.218	0.017
0.269	0.008	0.008	0.235	0.017
0.319	0.008	0.008	0.235	0.017
0.353	0.008	0.008	0.277	0.017
0.361	0.008	0.008	0.294	0.017
0.429	0.008	0.008	0.294	0.017
0.462	0.008	0.008	0.311	0.017
0.487	0.008	0.008	0.319	0.025
0.555	0.008	0.008	0.420	0.025
0.622	0.008	0.008	0.437	0.025
0.655	0.008	0.008	0.445	0.025
0.798	0.008	0.008	0.487	0.025
0.807	0.008	0.008	0.773	0.034
0.874	0.008	0.008	0.773	0.034
1.151	0.008	0.008	0.815	0.042
1.218	0.008	0.008	1.882	0.042
1.294	0.008	0.008	11.932	0.059
1.344	0.008	0.008	2.336	0.067
1.807	0.008	0.008	2.655	0.076
1.975	0.008	0.008	3.000	0.084
	0.008	0.008	4.966	0.109
	0.008	0.008	5.285	0.118
	0.008	0.008		0.151
	0.008	0.008		0.151
	0.008	0.008		0.176
	0.008	0.008		0.202
	0.008	0.008		0.252
	0.008	0.008		0.269
	0.008	0.008		0.311
	0.008	0.008		0.370
	0.008	0.008		0.403
	0.008	0.008		0.420
	0.008	0.008		0.546
	0.008	0.008		0.555
	0.008	0.008		0.807
	0.008	0.008		1.042
	0.008	0.008		1.050
	0.008	0.008		1.109
	0.008	0.008		2.151
	0.008	0.008		2.201
	0.008	0.008		2.286
	0.008	0.008		2.546
	0.008	0.008		2.563
	0.008	0.008		2.891
	0.008	0.008		3.294
	0.008	0.008		3.311
	0.008	0.008		3.638
	0.008	0.008		5.857
	0.008	0.008
	0.008	0.008
	0.008	0.008
	0.008	0.008
	0.008	0.008
	0.008	0.008
	0.008	0.008
	0.008	0.008
	0.008	0.008
	0.008	0.008
	0.008	0.008
	0.008	0.008
	0.008	0.008
	0.008	0.008
	0.008	0.008
	0.008	0.008
	0.008	0.008
	0.008	0.008
	0.008	0.008
	0.008	0.008
	0.008	0.008
	0.008	0.008
	0.008	0.008
	0.008	0.008
	0.008	0.008
	0.008	0.008
	0.008	0.008
	0.008	0.008
	0.008	0.008
	0.008	0.008
	0.008	0.008
	0.008	0.008
	0.008	0.008
	0.008	0.008
	0.008	0.008
	0.008	0.008
	0.008	0.008
	0.008	0.008
	0.008	0.008
	0.008	0.008
	0.008	0.008
	0.008	0.008
	0.008	0.008
	0.008	0.008
	0.017	0.008
	0.017	0.008
	0.017	0.008
	0.017	0.008
	0.017	0.008
	0.017	0.008
	0.017	0.008
	0.017	0.008
	0.017	0.008
	0.017	0.008
	0.017	0.008
	0.017	0.008
	0.017	0.008
	0.017	0.008
	0.017	0.008
	0.017	0.008
	0.017	0.008
	0.017	0.008
	0.017	0.008
	0.017	0.008
	0.017	0.008
	0.017	0.008
	0.017	0.008
	0.025	0.008
	0.025	0.008
	0.034	0.008
	0.034	0.008
	0.034	0.008
	0.059	0.008
	0.059	0.008
	0.059	0.008
	0.067	0.008
	0.067	0.008
	0.076	0.008
	0.076	0.008
	0.076	0.008
	0.084	0.008
	0.160	0.008
	0.160	0.008
	0.160	0.008
	0.160	0.008
	0.193	0.008
	0.277	0.008
	0.294	0.008
	0.328	0.008
	0.387	0.008
	0.445	0.008
	0.462	0.008
	0.513	0.008
	0.513	0.008
	0.546	0.008
	0.555	0.008
	0.706	0.008
	0.765	0.008
	0.773	0.008
	0.924	0.008
	1.050	0.008
	1.126	0.008
	1.437	0.008
	1.840	0.008
	1.899	0.008
	1.958	0.008
	2.017	0.008
	2.302	0.008
	2.378	0.008
	2.613	0.008
	2.622	0.008
	2.706	0.008
	2.975	0.008
	3.311	0.008
	3.706	0.008
	4.243	0.008
	4.756	0.008
		0.008
		0.008
		0.008
		0.008
		0.008
		0.008
		0.008
		0.008
		0.008
		0.008
		0.008
		0.008
		0.008
		0.008
		0.008
		0.008
		0.008
		0.008
		0.008
		0.008
		0.008
		0.008
		0.008
		0.008
		0.008
		0.008
		0.008
		0.008
		0.008
		0.008
		0.008
		0.008
		0.008
		0.008
		0.008
		0.008
		0.008
		0.008
		0.008
		0.008
		0.008
		0.008
		0.008
		0.008
		0.008
		0.008
		0.008
		0.008
		0.008
		0.008
		0.008
		0.008
		0.008
		0.008
		0.008
		0.008
		0.008
		0.008
		0.008
		0.008
		0.008
		0.008
		0.008
		0.008
		0.008
		0.008
		0.008
		0.008
		0.008
		0.008
		0.008
		0.008
		0.008
		0.008
		0.008
		0.008
		0.008
		0.008
		0.008
		0.008
		0.008
		0.008
		0.008
		0.008
		0.008
		0.008
		0.008
		0.008
		0.008
		0.008
		0.008
		0.008
		0.008
		0.008
		0.008
		0.008
		0.008
		0.008
		0.008
		0.008
		0.008
		0.008
		0.008
		0.008
		0.008
		0.008
		0.008
		0.008
		0.008
		0.008
		0.008
		0.008
		0.008
		0.008
		0.008
		0.008
		0.008
		0.008
		0.008
		0.008
		0.008
		0.008
		0.008
		0.008
		0.008
		0.008
		0.008
		0.008
		0.008
		0.008
		0.008
		0.008
		0.008
		0.008
		0.008
		0.008
		0.008
		0.008
		0.008
		0.008
		0.008
		0.008
		0.008
		0.008
		0.008
		0.008
		0.008
		0.008
		0.008
		0.008
		0.008
		0.008
		0.008
		0.008
		0.008
		0.008
		0.008
		0.008
		0.008
		0.008
		0.008
		0.008
		0.008
		0.008
		0.008
		0.008
		0.008
		0.008
		0.008
		0.008
		0.008
		0.008
		0.008
		0.008
		0.008
		0.008
		0.008
		0.008
		0.008
		0.008
		0.008
		0.008
		0.008
		0.008
		0.008
		0.008
		0.008
		0.008
		0.008
		0.008
		0.008
		0.008
		0.008
		0.008
		0.008
		0.008
		0.008
		0.008
		0.008
		0.008
		0.008
		0.008
		0.008
		0.008
		0.008
		0.008
		0.008
		0.008
		0.008
		0.008
		0.008
		0.008
		0.008
		0.008
		0.008
		0.008
		0.008
		0.008
		0.008
		0.008
		0.008
		0.008
		0.008
		0.008
		0.008
		0.008
		0.008
		0.008
		0.008
		0.008
		0.008
		0.008
		0.008
		0.008
		0.008
		0.008
		0.008
		0.008
		0.008
		0.008
		0.008
		0.008
		0.008
		0.008
		0.008
		0.008
		0.008
		0.008
		0.008
		0.008
		0.008
		0.008
		0.008
		0.008
		0.008
		0.008
		0.008
		0.008
		0.008
		0.008
		0.008
		0.008
		0.008
		0.008
		0.008
		0.008
		0.008
		0.008
		0.008
		0.008
		0.008
		0.008
		0.008
		0.008
		0.008
		0.008
		0.008
		0.008
		0.008
		0.008
		0.008
		0.008
		0.008
		0.008
		0.008
		0.008
		0.008
		0.008
		0.008
		0.008
		0.008
		0.008
		0.008
		0.008
		0.008
		0.008
		0.008
		0.008
		0.008
		0.008
		0.008
		0.008
		0.008
		0.008
		0.008
		0.008
		0.008
		0.008
		0.008
		0.008
		0.008
		0.008
		0.008
		0.008
		0.008
		0.008
		0.008
		0.008
		0.008
		0.008
		0.008
		0.008
		0.008
		0.008
		0.008
		0.008
		0.008
		0.008
		0.008
		0.008
		0.008
		0.008
		0.008
		0.008
		0.008
		0.008
		0.008
		0.008
		0.008
		0.008
		0.008
		0.008
		0.008
		0.008
		0.008
		0.008
		0.008
		0.008
		0.008
		0.008
		0.008
		0.008
		0.008
		0.008
		0.008
		0.008
		0.008
		0.008
		0.008
		0.008
		0.008
		0.008
		0.008
		0.008
		0.008
		0.008
		0.008
		0.008
		0.008
		0.008
		0.008
		0.008
		0.008
		0.008
		0.008
		0.008
		0.008
		0.008
		0.008
		0.008
		0.008
		0.008
		0.008
		0.008
		0.008
		0.008
		0.008
		0.008
		0.008
		0.008
		0.008
		0.008
		0.008
		0.008
		0.008
		0.008
		0.008
		0.008
		0.008
		0.008
		0.008
		0.008
		0.008
		0.008
		0.008
		0.008
		0.008
		0.008
		0.008
		0.008
		0.008
		0.008
		0.008
		0.008
		0.008
		0.008
		0.008
		0.008
		0.008
		0.008
		0.008
		0.008
		0.008
		0.008
		0.008
		0.008
		0.008
		0.008
		0.008
		0.008
		0.008
		0.008
		0.008
		0.008
		0.008
		0.008
		0.008
		0.008
		0.008
		0.008
		0.008
		0.008
		0.008
		0.008
		0.008
		0.008
		0.008
		0.008
		0.008
		0.008
		0.008
		0.008
		0.008
		0.008
		0.008
		0.008
		0.008
		0.008
		0.008
		0.008
		0.008
		0.008
		0.008
		0.008
		0.008
		0.008
		0.008
		0.008
		0.008
		0.008
		0.008
		0.008
		0.008
		0.008
		0.008
		0.008
		0.008
		0.008
		0.008
		0.008
		0.008
		0.008
		0.008
		0.008
		0.008
		0.008
		0.008
		0.008
		0.008
		0.008
		0.008
		0.008
		0.008
		0.008
		0.008
		0.008
		0.008
		0.008
		0.008
		0.008
		0.008
		0.008
		0.008
		0.008
		0.008
		0.008
		0.008
		0.008
		0.008
		0.008
		0.008
		0.008
		0.008
		0.008
		0.008
		0.008
		0.008
		0.008
		0.008
		0.008
		0.008
		0.008
		0.008
		0.008
		0.008
		0.008
		0.008
		0.008
		0.008
		0.008
		0.008
		0.008
		0.008
		0.008
		0.008
		0.008
		0.008
		0.008
		0.008
		0.008
		0.008
		0.008
		0.008
		0.008
		0.008
		0.008
		0.008
		0.008
		0.008
		0.008
		0.008
		0.008
		0.008
		0.008
		0.008
		0.008
		0.008
		0.008
		0.008
		0.008
		0.008
		0.008
		0.008
		0.008
		0.008
		0.008
		0.008
		0.008
		0.008
		0.008
		0.008
		0.008
		0.008
		0.008
		0.008
		0.008
		0.008
		0.008
		0.008
		0.008
		0.008
		0.008
		0.008
		0.008
		0.008
		0.008
		0.008
		0.008
		0.008
		0.008
		0.008
		0.008
		0.008
		0.008
		0.008
		0.008
		0.008
		0.008
		0.008
		0.008
		0.008
		0.008
		0.008
		0.008
		0.008
		0.008
		0.008
		0.008
		0.008
		0.008
		0.008
		0.008
		0.008
		0.008
		0.008
		0.008
		0.008
		0.008
		0.008
		0.008
		0.008
		0.008
		0.008
		0.008
		0.008
		0.008
		0.008
		0.008
		0.008
		0.008
		0.008
		0.008
		0.008
		0.008
		0.008
		0.008
		0.008
		0.008
		0.008
		0.008
		0.008
		0.008
		0.008
		0.008
		0.008
		0.008
		0.008
		0.008
		0.008
		0.008
		0.008
		0.008
		0.008
		0.008
		0.008
		0.008
		0.008
		0.008
		0.008
		0.008
		0.008
		0.008
		0.008
		0.008
		0.008
		0.008
		0.008
		0.008
		0.008
		0.008
		0.008
		0.008
		0.008
		0.008
		0.008
		0.008
		0.008
		0.008
		0.008
		0.008
		0.008
		0.008
		0.008
		0.008
		0.008
		0.008
		0.008
		0.008
		0.008
		0.008
		0.008
		0.008
		0.008
		0.008
		0.008
		0.008
		0.008
		0.008
		0.008
		0.008
		0.008
		0.008
		0.008
		0.008
		0.008
		0.008
		0.008
		0.008
		0.008
		0.008
		0.008
		0.008
		0.008
		0.008
		0.008
		0.008
		0.008
		0.008
		0.008
		0.008
		0.008
		0.008
		0.008
		0.008
		0.008
		0.008
		0.008
		0.008
		0.008
		0.008
		0.008
		0.008
		0.008
		0.008
		0.008
		0.008
		0.008
		0.008
		0.008
		0.008
		0.008
		0.008
		0.008
		0.008
		0.008
		0.008
		0.008
		0.008
		0.008
		0.008
		0.008
		0.008
		0.008
		0.008
		0.008
		0.008
		0.008
		0.008
		0.008
		0.008
		0.008
		0.008
		0.008
		0.008
		0.008
		0.008
		0.008
		0.008
		0.008
		0.008
		0.008
		0.008
		0.008
		0.008
		0.008
		0.008
		0.008
		0.008
		0.008
		0.008
		0.008
		0.008
		0.008
		0.008
		0.008
		0.008
		0.008
		0.008
		0.008
		0.008
		0.008
		0.008
		0.008
		0.008
		0.008
		0.008
		0.008
		0.008
		0.008
		0.008
		0.008
		0.008
		0.008
		0.008
		0.008
		0.008
		0.008
		0.008
		0.008
		0.008
		0.008
		0.008
		0.008
		0.008
		0.008
		0.008
		0.008
		0.008
		0.008
		0.008
		0.008
		0.008
		0.008
		0.008
		0.008
		0.008
		0.008
		0.008
		0.008
		0.008
		0.008
		0.008
		0.008
		0.008
		0.008
		0.008
		0.008
		0.008
		0.008
		0.008
		0.008
		0.008
		0.008
		0.008
		0.008
		0.008
		0.008
		0.008
		0.008
		0.008
		0.008
		0.008
		0.008
		0.008
		0.008
		0.008
		0.008
		0.008
		0.008
		0.008
		0.008
		0.008
		0.008
		0.008
		0.008
		0.008
		0.008
		0.008
		0.008
		0.008
		0.008
		0.008
		0.008
		0.008
		0.008
		0.008
		0.008
		0.008
		0.008
		0.008
		0.008
		0.008
		0.008
		0.008
		0.008
		0.008
		0.008
		0.008
		0.008
		0.008
		0.008
		0.008
		0.008
		0.008
		0.008
		0.008
		0.008
		0.008
		0.008
		0.008
		0.008
		0.008
		0.008
		0.008
		0.008
		0.008
		0.008
		0.008
		0.008
		0.008
		0.008
		0.008
		0.008
		0.008
		0.008
		0.008
		0.008
		0.008
		0.008
		0.008
		0.008
		0.008
		0.008
		0.008
		0.008
		0.008
		0.008
		0.008
		0.008
		0.008
		0.008
		0.008
		0.008
		0.008
		0.008
		0.008
		0.008
		0.008
		0.008
		0.008
		0.008
		0.008
		0.008
		0.008
		0.008
		0.008
		0.008
		0.008
		0.008
		0.008
		0.008
		0.008
		0.008
		0.008
		0.008
		0.008
		0.008
		0.008
		0.008
		0.008
		0.008
		0.008
		0.008
		0.008
		0.008
		0.008
		0.008
		0.008
		0.008
		0.008
		0.008
		0.008
		0.008
		0.008
		0.008
		0.008
		0.008
		0.008
		0.008
		0.008
		0.008
		0.008
		0.008
		0.008
		0.008
		0.008
		0.008
		0.008
		0.008
		0.008
		0.017
		0.017
		0.017
		0.017
		0.017
		0.017
		0.017
		0.017
		0.017
		0.017
		0.017
		0.017
		0.017
		0.017
		0.017
		0.017
		0.017
		0.017
		0.017
		0.017
		0.017
		0.017
		0.017
		0.017
		0.017
		0.017
		0.017
		0.017
		0.017
		0.017
		0.017
		0.017
		0.017
		0.017
		0.017
		0.017
		0.017
		0.017
		0.017
		0.017
		0.017
		0.017
		0.017
		0.017
		0.017
		0.017
		0.017
		0.017
		0.017
		0.017
		0.017
		0.017
		0.017
		0.017
		0.017
		0.017
		0.017
		0.017
		0.017
		0.017
		0.017
		0.017
		0.017
		0.017
		0.017
		0.017
		0.017
		0.017
		0.017
		0.017
		0.017
		0.017
		0.017
		0.017
		0.017
		0.017
		0.017
		0.017
		0.017
		0.017
		0.017
		0.017
		0.017
		0.017
		0.017
		0.017
		0.017
		0.017
		0.017
		0.017
		0.017
		0.017
		0.017
		0.017
		0.017
		0.017
		0.017
		0.017
		0.017
		0.017
		0.017
		0.017
		0.017
		0.017
		0.017
		0.017
		0.017
		0.017
		0.017
		0.017
		0.017
		0.017
		0.017
		0.017
		0.017
		0.017
		0.017
		0.017
		0.017
		0.017
		0.017
		0.017
		0.017
		0.017
		0.017
		0.017
		0.017
		0.017
		0.017
		0.017
		0.017
		0.017
		0.017
		0.017
		0.017
		0.017
		0.017
		0.017
		0.017
		0.017
		0.017
		0.017
		0.017
		0.017
		0.017
		0.017
		0.017
		0.017
		0.017
		0.017
		0.017
		0.017
		0.017
		0.017
		0.017
		0.017
		0.017
		0.017
		0.017
		0.017
		0.017
		0.017
		0.017
		0.017
		0.017
		0.017
		0.017
		0.017
		0.017
		0.017
		0.017
		0.017
		0.025
		0.025
		0.025
		0.025
		0.025
		0.025
		0.025
		0.025
		0.025
		0.025
		0.025
		0.025
		0.025
		0.025
		0.025
		0.025
		0.025
		0.025
		0.025
		0.025
		0.025
		0.025
		0.025
		0.025
		0.025
		0.025
		0.025
		0.025
		0.025
		0.025
		0.025
		0.025
		0.025
		0.025
		0.025
		0.025
		0.025
		0.025
		0.025
		0.025
		0.025
		0.025
		0.025
		0.034
		0.034
		0.034
		0.034
		0.034
		0.034
		0.034
		0.034
		0.034
		0.034
		0.034
		0.034
		0.034
		0.034
		0.034
		0.034
		0.042
		0.042
		0.042
		0.042
		0.042
		0.042
		0.042
		0.042
		0.042
		0.042
		0.050
		0.050
		0.050
		0.050
		0.050
		0.059
		0.059
		0.059
		0.059
		0.067
		0.084
		0.084
		0.084
		0.143
		0.176
		0.176
		0.202
		0.218
		0.244
		0.260
		0.336
		0.345
		0.395
		0.445
		0.504
		0.723
		0.933
		1.084
		1.109
		1.218
		1.319
		1.328
		1.538
		1.706
		1.731
		1.840
		1.907
		15.352
		3.143
		3.201
		4.353
		5.058
		5.689

## Sheet: recap
IF : LGG-2 TH nbr de points
Area	0.025-0,099	0.1 -0.19	0.20-0.29	0.30-0.39	0.40-0.49	0.50-0.59	0.60-0.69	0.70-0.79	0.80-0.89	0.90-0.99	entre 1 et 1,99	entre 2 et 2,99	entre 3 et 3,99	entre 4 et 4,99	>5
N2-1	3	3	2	0	0	0	0	1	3	0	0	1	0	0	0
N2-2	8	5	5	0	1	1	0	0	0	0	0	0	1	0	0
N2-3	3	0	0	1	1	1	0	0	0	1	0	0	1	0	0
N2-4	4	2	4	0	3	0	1	0	0	0	0	0	1	0	0
moyenne	4.5	2.5	2.75	0.25	1.25	0.5	0.25	0.25	0.75	0.25	0	0.25	0.75	0	0
tot	18	10	11	1	5	2	1	1	3	1	0	1	3	0	0
GA-1	3	8	13	17	3	4	0	1	1	1	1	0	0	0	0
GA-2	8	12	4	3	0	2	1	0	0	0	0	0	0	0	0
GA-3	21	2	2	0	1	2	1	0	0	0	2	0	0	0	0
GA-4	11	7	4	1	1	0	1	1	0	0	1	0	0	0	0
GA-5	10	9	5	3	2	2	1	2	0	0	0	0	0	0	0
GA-6	13	11	5	1	2	1	1	1	1	1	0	1	0	0	0
GA-7	5	4	2	1	1	1	1	2	0	1	1	0	2	0	0
GA.8	7	2	2	0	1	1	0	2	0	0	1	0	0	0	0
GA.9	18	10	5	1	2	0	1	0	0	1	1	0	0	0	0
moyenne	10.6667	7.22222	4.66667	3	1.44444	1.44444	0.777778	1	0.222222	0.444444	0.777778	0.111111	0.222222	0	0
tot	96	65	42	27	13	13	7	9	2	4	7	1	2	0	0
Area	0.025-0,099	0.1 -0.19	0.20-0.29	0.30-0.39	0.40-0.49	0.50-0.59	0.60-0.69	0.70-0.79	0.80-0.89	0.90-0.99	entre 1 et 1,99	entre 2 et 2,99	entre 3 et 3,99	entre 4 et 4,99	>5
GASTOP 1	16	2	2	3	3	1	2	1	2	1	6	0	0	0	0
GASTOP 2	15	5	2	2	2	4	0	3	0	1	6	7	2	2	0
GASTOP 3	80	3	3	3	1	1	0	1	0	1	10	0	2	1	3
GASTOP 4	8	8	6	2	4	0	0	2	1	0	1	2	1	1	2
GASTOP 5	13	5	3	2	2	2	0	0	1	0	3	6	3	0	1
moyenne	26.4	4.6	3.2	2.4	2.4	1.6	0.4	1.4	0.8	0.6	5.2	3	1.6	0.8	1.2
tot	132	23	16	12	12	8	2	7	4	3	26	15	8	4	6
