# Supplementary material for: LGG-1/GABARAP lipidation is not required for autophagy and development in Caenorhabditis elegans
Source: eLife journal article supplement (doi:10.7554/elife.85748), 2023-07-03
Supplement: supp [file Bilan Spe-11 hsp6GFP.xlsx]

## Sheet: Feuil1
Males Spe-11-hsp6-GFP / + x N2
	1C			2C			4C			6C			8C		10C		12C			16C		20C			25-30			50C
5881	29		5991	36		5881	25		5885	19		5902	0				0		S18037	0				5954	0			0
5888	36		5992	32		5884	28		5909	9		5907	0							0				18040	0			0
5889	33		5893	30		5895	20		5911	8		5916	10												0			0
5890	39		5894	26		5897	15		5912	0															0			0
			5998	20		5899	12		5913	0															0			0
			5901	12		5903	19		5915	11															0
						5904	19
						5905	10
						5906	14
						5908	16
						5910	12
						5914	13
Moyenne	34.25			26			16.9167			7.83333			3.33333		#DIV/0!		0			0		#DIV/0!			0			0
Males Spe-11-hsp6-GFP / + x N2
1C	2C	4C	6-10C	12-20C	25-50
29	36	25	19	0	0
36	32	28	9	0	0
33	30	20	8	0	0
39	26	15	0		0
	20	12	0		0
	12	19	11		0
		19	0		0
		10	0		0
		14	10		0
		16			0
		12			0
		13
34.25	26	16.9167	6.33333	0	0
Males Spe-11-hsp6-GFP / + x herma lgg-1(GA)
	1C			2C			4C			6C			8C		10C		12C			16C		20C			25-30			50C
5921	21		5919	23		5917	26		5926	8		5936	19	5933	10	5923	5		5924	0	5937	7		5938	0		5940	0
5918	20			24		5922	23		5836	33		5943	8	5942	11	5925	0		5927	0	5945	6		5938	0		5940	0
5931	35		5941	38		5925	5									5844	0		5950	13	5945	0		5948	0		5947	0
5929	20					5928	22									5946	0				5952	0		5951	0		5949	1
5932	53					5930	37
						5833	36
						5939	52
Moyenne	29.8			28.3333			28.7143			20.5			13.5		10.5		1.25			4.33333		3.25			0			0.25
Males Spe-11-hsp6-GFP / + x lgg-1(G116A) pp65
1C	2C	4C	6-10C	12-20C	25-50
21	23	26	8	5	0
20	24	23	33	0	0
35	38	5	19	0	0
20		22	8	0	0
53		37	10	0	0
		36	11	0	0
		52		13	0
				7	1
				6
				0
				0
29.8	28.3333	22.6	15.6	1	0
Males Spe-11-hsp6-GFP / + x lgg-1(GA);lgg-2(tm5755)
	1C			2C			4C			6C			8C		10C		12C			16C		20C			25-30				50C
5893.1	27		5892	47		5891	22		5899-3	26		5894	18	5902	34	5906	12		5899-1	16	5899-2	8		5900	1			5930	12
5903	43		5896	45		5897	23		5911	34		5928	20	5904	38	5907	17		5905	0	5916	14		5908	3			5936	8
5919	5		5898	27		5912	27		5926	2		5933	43	5924	12	5937	17				5921	23		5918	7
5922	37		5901	41		5917	21					5938	25								5931	20		5920	3
5934	47		5909	35		5925	9																	5923	13
			5914	16		5927	24																	5932	5
																								5935	7
																								5939	9
Moyenne	31.8			35.1667			21			20.6667			26.5		28		15.3333			8		16.25			6				10
1C	2C	4C	6-10C	12-20C	25-50	100C-150C
27	47	22	26	12	1	12
43	45	23	25	17	3	0
5	27	27	2	17	7	0
37	41	21	18	16	3	0
47	35	15	20	0	13
	16	24	43	8	5
			25	14	7
			34	23	9
			38	20	12
			12		8
31.8	35.1667	22	24.3	14.1111	6.8	3
Males Spe-11-hsp6-GFP / + x lgg-1(tm3489)
	1C			2C			4C			6C			8C		10C		12C			16C		20C			25-30				50C			100C		150C
5946	20		5943	19		5945	6		5978-3	21				5953	33	5961	34		5950	26	5944	19		5947	18			5955	18		5959	1
5951	58		5952	21		5962-1	36							5960	33	5963	12		5953-2	26	5958	30		5976-2	11			5967	16		5964	5
5954	36		5970	17										5971	45	5976-1	26		5956	49	5980	39									5965	10
5962-2	40		5978-1	20										5972	53				5957	33
5974	30		5983	36										5979	17				5976	20
																			5878-2	11
																			5981	40
																			5982	27
moyenne	36.8			22.6			21			21					36.2		24			29		29.3333			14.5
1C	2C	4C	6-10C	12-20C	25-50	100C-150C
20	19	6	21	34	19	1
58	21	36	33	12	30	5
36	17		33	26	39	10
40	20		45	26	18
30	36		53	26	11
			17	49	18
				33	16
				20
				11
				40
				27
41	23.5	36	36.2	27	22	7.5
Males Spe-11-hsp6-GFP / + x lgg-2(tm5755)
	1C			2C			4C			6C			8C		10C		12C			16C		20C			25-30				50C			100C		150C
6194	42		6193	48		6195	27		6210	7		6196	0	6225	0	6233	1		6196	0	6207	0		6198	0			6197	1		6204	0
6195	30		6197	42		6200	23		6226	2		6209	3						6198	0	6215	0		6199	0			6208	0
6197	21		6197	56		6201	19		6228	5									6203	0	6220	0		6211	0			6218	0
6219	38		6202	28		6912	0												6206	0	6234	25		6199	0
			6205	38		6213	24												6209	1				6232	0
			6227	54		6216	16												6214	0
			6230	25		6222	14												6223	0
						6224	17												6229	15
						6225	13												6231	0
	32.75			41.5714			17			4.66667			1.5		0		1			1.77778		6.25			0				0.333333			0
1C	2C	4C	6-10C	12-20C	25-50	100C-150C
42	48	27	7	1	0	0
30	42	23	2	0	0
21	56	19	5	0	0
38	28	0	0	0	0
	38	24	3	0	0
	54	16	0	1	1
	25	14		0	0
		17		0	0
		13		15
				0
				0
				0
				0
				25
32.75	41.5714	17	2.83333	3	0.125	0
