# Supplementary material for: LGG-1/GABARAP lipidation is not required for autophagy and development in Caenorhabditis elegans
Source: eLife journal article supplement (doi:10.7554/elife.85748), 2023-07-03
Supplement: supp [file Bilan starvation 2018 + 2019 + 2021.xlsx]

## Sheet: Feuil1
Test du Chi2
p=	4.00137e-05		si p<0,05 : il y a une différence significative.
N2 / lgg-1(tm3489)
Jour n°1					Jour n°3					Jour n°5
	WT	tm3489	total			WT	tm3489	total			WT	tm3489	total
nb de mort	0	22	22		nb de mort	15	152	167		nb de mort	20	172	192
nb de survivants	82	98	180		nb de survivant	74	20	94		nb de survivant	93	68	161
total	82	120	202		total	89	172	261		total	113	240	353
Expected					Expected					Expected
nb CP	WT	tm3489	total		nb CP	WT	tm3489	total		nb CP	WT	tm3489	total
mort	8.93069	13.0693	180		mort	56.9464	110.054	94		mort	61.4618	130.538	161
pas mort	73.0693	106.931	180		pas mort	32.0536	61.9464	94		pas mort	51.5382	109.462	161
total	82	120	202		total	89	172	261		total	113	240	353
lgg-1(GA)/ lgg-1(tm3489)
Jour n°1					Jour n°3					Jour n°5
	lgg-1(GA)	tm3489	total			lgg-1(GA)	tm3489	total			lgg-1(GA)	tm3489	total
nb de mort	0	22	22		nb de mort	16	152	168		nb de mort	18	172	190
nb de survivants	60	98	158		nb de survivant	87	20	107		nb de survivant	74	68	142
total	60	120	180		total	103	172	275		total	92	240	332
Expected					Expected					Expected
nb CP	lgg-1(GA)	tm3489	total		nb CP	lgg-1(GA)	tm3489	total		nb CP	lgg-1(GA)	tm3489	total
mort	7.33333	14.6667	158		mort	62.9236	105.076	107		mort	52.6506	137.349	142
pas mort	52.6667	105.333	158		pas mort	40.0764	66.9236	107		pas mort	39.3494	102.651	142
total	60	120	180		total	103	172	275		total	92	240	332
lgg-2(tm5755)/ lgg-1(tm3489)
Jour n°1					Jour n°3					Jour n°5
	lgg-2(tm5755)	tm3489	total			lgg-2(tm5755)	tm3489	total			lgg-2(tm5755)	tm3489	total
nb de mort	0	22	22		nb de mort	16	152	168		nb de mort	15	172	187
nb de survivants	60	98	158		nb de survivant	87	20	107		nb de survivant	67	68	135
total	60	120	180		total	103	172	275		total	82	240	322
Expected					Expected					Expected
nb CP	lgg-2(tm5755)	tm3489	total		nb CP	lgg-2(tm5755)	tm3489	total		nb CP	lgg-2(tm5755)	tm3489	total
mort	7.33333	14.6667	158		mort	62.9236	105.076	107		mort	47.6211	139.379	135
pas mort	52.6667	105.333	158		pas mort	40.0764	66.9236	107		pas mort	34.3789	100.621	135
total	60	120	180		total	103	172	275		total	82	240	322
lgg-1(GA); lgg-2(tm5755)/ lgg-1(tm3489)
Jour n°1					Jour n°3					Jour n°5
	lgg-1(GA) lgg-2(tm5755)	tm3489	total			lgg-1(GA) lgg-2(tm5755)	tm3489	total			lgg-1(GA) lgg-2(tm5755)	tm3489	total
nb de mort	3	22	25		nb de mort	16	152	168		nb de mort	56	172	228
nb de survivants	67	98	165		nb de survivant	87	20	107		nb de survivant	75	68	143
total	70	120	190		total	103	172	275		total	131	240	371
Expected					Expected					Expected
nb CP	lgg-1(GA) lgg-2(tm5755)	tm3489	total		nb CP	lgg-1(GA) lgg-2(tm5755)	tm3489	total		nb CP	lgg-1(GA) lgg-2(tm5755)	tm3489	total
mort	9.21053	15.7895	165		mort	62.9236	105.076	107		mort	80.5067	147.493	143
pas mort	60.7895	104.211	165		pas mort	40.0764	66.9236	107		pas mort	50.4933	92.5067	143
total	70	120	190		total	103	172	275		total	131	240	371

## Sheet: Feuil2
J1 STARVATION							Expected					Expected					Expected
	wt	lgg-1(tm3489)	lgg-1(GA)	lgg-2(tm5755)	lgg-1(GA) lgg-2(tm5755)			WT	tm3489	total			WT	lgg-1(GA);lgg-2(tm5755)	total			lgg-1(GA)	lgg-2(tm5755)	total
number of dead worms- nm	0	22	0	0	3		nm	8.93069	13.0693	22		nm	1.61842	1.38158	3		nm	0	0	0
number of survived worms- ns	82	98	60	72	67		ns	73.0693	106.931	180		ns	80.3816	68.6184	149		ns	60	72	132
number of worms- np	80	120	55	70	70		total	82	120	202		total	82	70	152		total	60	72	132
total of worms	82	120	60	72	70
% de survie	1.025	0.8167	1.091	1.0286	0.9571
J3 STARVATION							Expected					Expected					Expected
	wt	lgg-1(tm3489)	lgg-1(GA)	lgg-2(tm5755)	lgg-1(GA) lgg-2(tm5755)			WT	lgg-1(tm3489)	total			WT	lgg-1(GA);lgg-2(tm5755)	total			lgg-1(GA)	lgg-2(tm5755)	total
number of dead worms- nm	15	126	16	16	49		nm	44.6584	96.3416	141		nm	27.9216	36.0784	64		nm	16.48	15.52	32
number of survived worms- ns	74	66	87	81	66		ns	44.3416	95.6584	140		ns	61.0784	78.9216	140		ns	86.52	81.48	168
number of worms- np	89	192	103	97	115		total	89	192	281		total	89	115	204		total	103	97	200
total of worms	89	192	103	97	115
% de survie	0.831461	0.34375	0.84466	0.835052	0.573913
J5 STARVATION							Expected					Expected					Expected
	wt	lgg-1(tm3489)	lgg-1(GA)	lgg-2(tm5755)	lgg-1(GA) lgg-2(tm5755)			WT	lgg-1(tm3489)	total			WT	lgg-1(GA);lgg-2(tm5755)	total			lgg-1(GA)	lgg-2(tm5755)	total
number of dead worms- nm	20	172	18	15	56		nm	61.4618	130.538	192		nm	35.1967	40.8033	76		nm	17.4483	15.5517	33
number of survived worms- ns	93	68	74	67	75		ns	51.5382	109.462	161		ns	77.8033	90.1967	168		ns	74.5517	66.4483	141
number of worms- np	113	240	92	82	131		total	113	240	353		total	113	131	244		total	92	82	174
total of worms	113	240	92	82	131
% de survie	0.823009	0.283333	0.804348	0.817073	0.572519
J7 STARVATION							Expected					Expected					Expected
	wt	lgg-1(tm3489)	lgg-1(GA)	lgg-2(tm5755)	lgg-1(GA) lgg-2(tm5755)			WT	lgg-1(tm3489)	total			WT	lgg-1(GA);lgg-2(tm5755)	total			lgg-1(GA)	lgg-2(tm5755)	total
number of dead worms- nm	137	239	84	109	94		nm	119.089	256.911	376		nm	155.132	130.221	231		nm	87.7273	109	193
number of survived worms- ns							ns	0	0	0		ns	0	0	0		ns	0	0	0
number of worms- np	137	239	84	109	94		total	137	239	376		total	137	94	231		total	84	109	193
total of worms	137	239	84	109	94
% de survie	0	0	0	0	0
T nm tot	35	320					T nm tot	115.051	239.949			T nm tot	64.7367	78.2633			T nm tot	33.9283	31.0717
T ns tot	249	232					T ns tot	168.949	312.051			T ns tot	219.263	237.737			T ns tot	221.072	219.928
p value	1.71832e-32
T nm tot			34	31
T ns tot			221	220
p value	0.984781
T nm tot	35				108			35	108
T ns tot	249				208			249	208
p value	1.06949e-08

## Sheet: 2018 + 2021
													2021	2021	2019
J0 STARVATION								wt	lgg-1(tm3489)	lgg-1(GA)	lgg-2(tm5755)	lgg-1(GA) lgg-2(tm5755)	lgg-1(G116AG117stop) lgg-2(tm5755)	lgg-1(G116A) lgg-2(tm5755)	lgg-1(G116AG117*)	lgg-1(G116AG117A)
	wt	lgg-1(tm3489)	lgg-1(GA)	lgg-2(tm5755)	lgg-1(GA) lgg-2(tm5755)		J0	1	1	1	1	1	1	1	0.99	1
number of dead worms- nm	0	22	2	2	3		J2	1	0.8167	0.986667	0.972222	0.957143	0.9944	0.9945	0.99	0.837
number of survived worms- ns	80	98	74	70	67		J4	0.831461	0.369792	0.84466	0.835052	0.652174	0.8136	0.9399	0.99	0.8
number of worms- np	80	120	75	72	70		J6	0.823009	0.283333	0.826087	0.817073	0.572519	0.2316	0.7213	0.91	0.5209
total of worms	80	120	76	72	70		J8	0.817518	0.0711297	0.817308	0.788991	0.531915	4,52%%	0.4754	0.65	29,77`%
% de survie	1	0.8167	0.986667	0.972222	0.957143		J10	0.808333	0.0285714	0.816327	0.797753	0.3258	0,56%%	0.235	0.52	0
							J12	0.747573	0	0.77451	0.781022	0.261364	0	0.0984	0.2	0
J2 STARVATION							J14	0.7429	0	0.685393	0.669643	0.1461	0	0	0.05	0
	wt	lgg-1(tm3489)	lgg-1(GA)	lgg-2(tm5755)	lgg-1(GA) lgg-2(tm5755)		J16	0.7075	0	0.6364	0.646552	0.1	0	0	0	0
number of dead worms- nm	15	121	16	16	40		J18	0.6565	0	0.35	0.63	0.07	0	0
number of survived worms- ns	74	71	87	81	75		J20	0.315315	0	0.25	0.378947	0.0375	0	0
number of worms- np	89	192	103	97	115		J22	0.21	0	0.17	0.325	0	0	0
total of worms	89	192	103	97	115		J24	0.178571	0	0.0923077	0.186813	0	0	0
% de survie	0.831461	0.369792	0.84466	0.835052	0.652174		J26	0.06	0	0.0636364	0.0884956	0	0	0
							J26	0	0	0	0	0	0	0
J4 STARVATION
	wt	lgg-1(tm3489)	lgg-1(GA)	lgg-2(tm5755)	lgg-1(GA) lgg-2(tm5755)
number of dead worms- nm	20	172	16	15	56
number of survived worms- ns	93	68	76	67	75
number of worms- np	113	240	92	82	131
total of worms	113	240	92	82	131
% de survie	0.823009	0.283333	0.826087	0.817073	0.572519
J6 STARVATION
	wt	lgg-1(tm3489)	lgg-1(GA)	lgg-2(tm5755)	lgg-1(GA) lgg-2(tm5755)
number of dead worms- nm	25	222	19	23	44
number of survived worms- ns	112	17	85	86	50
number of worms- np	137	239	104	109	94
total of worms	137	239	104	109	94
% de survie	0.817518	0.0711297	0.817308	0.788991	0.531915
J8 STARVATION
	wt	lgg-1(tm3489)	lgg-1(GA)	lgg-2(tm5755)	lgg-1(GA) lgg-2(tm5755)
number of dead worms- nm	23	204	18	18	60
number of survived worms- ns	97	6	80	71	29
number of worms- np	120	210	98	89	89
total of worms	120	210	98	89	89
% de survie	0.808333	0.0285714	0.816327	0.797753	0.325843
J10 STARVATION
	wt	lgg-1(tm3489)	lgg-1(GA)	lgg-2(tm5755)	lgg-1(GA) lgg-2(tm5755)
number of dead worms- nm	26	230	23	30	65
number of survived worms- ns	77	0	79	107	23
number of worms- np	103	230	102	137	88
total of worms	103	230	102	137	88
% de survie	0.747573	0	0.77451	0.781022	0.261364
J12 STARVATION
	wt	lgg-1(tm3489)	lgg-1(GA)	lgg-2(tm5755)	lgg-1(GA) lgg-2(tm5755)
number of dead worms- nm	27	220	28	37	76
number of survived worms- ns	78	0	61	75	13
number of worms- np	105	220	89	112	89
total of worms	105	220	89	112	89
% de survie	0.742857	0	0.685393	0.669643	0.146067
J14 STARVATION
	wt	lgg-1(tm3489)	lgg-1(GA)	lgg-2(tm5755)	lgg-1(GA) lgg-2(tm5755)
number of dead worms- nm	27	200	40	41	81
number of survived worms- ns	65	0	70	75	9
number of worms- np	92	200	110	116	90
total of worms	92	200	110	116	90
% de survie	0.706522	0	0.636364	0.646552	0.1
J16 STARVATION
	wt	lgg-1(tm3489)	lgg-1(GA)	lgg-2(tm5755)	lgg-1(GA) lgg-2(tm5755)
number of dead worms- nm	38	210	105	33	107
number of survived worms- ns	72	0	25	64	11
number of worms- np	110	210	130	97	118
total of worms	110	210	130	97	118
% de survie	0.654545	0	0.192308	0.659794	0.0932203
J18 STARVATION
	wt	lgg-1(tm3489)	lgg-1(GA)	lgg-2(tm5755)	lgg-1(GA) lgg-2(tm5755)
number of dead worms- nm	76	198	63	59	77
number of survived worms- ns	35	0	6	36	3
number of worms- np	111	198	69	95	80
total of worms	111	198	69	95	80
% de survie	0.315315	0	0.0869565	0.378947	0.0375
J20 STARVATION
	wt	lgg-1(tm3489)	lgg-1(GA)	lgg-2(tm5755)	lgg-1(GA) lgg-2(tm5755)
number of dead worms- nm	79	197	65	81	83
number of survived worms- ns	21	0	7	39	0
number of worms- np	100	197	72	120	83
total of worms	100	197	72	120	83
% de survie	0.21	0	0.0972222	0.325	0
J22 STARVATION
	wt	lgg-1(tm3489)	lgg-1(GA)	lgg-2(tm5755)	lgg-1(GA) lgg-2(tm5755)
number of dead worms- nm	69	203	59	74	89
number of survived worms- ns	15	0	6	17	0
number of worms- np	84	203	65	91	89
total of worms	84	203	65	91	0
% de survie	0.178571	0	0.0923077	0.186813	0
J24 STARVATION
	wt	lgg-1(tm3489)	lgg-1(GA)	lgg-2(tm5755)	lgg-1(GA) lgg-2(tm5755)
number of dead worms- nm	94	203	103	103	92
number of survived worms- ns	6	0	7	10	0
number of worms- np	100	203	110	113	92
total of worms	100	203	110	113	0
% de survie	0.06	0	0.0636364	0.0884956	0
J26 STARVATION
	wt	lgg-1(tm3489)	lgg-1(GA)	lgg-2(tm5755)	lgg-1(GA) lgg-2(tm5755)
number of dead worms- nm	88	203	86	92	85
number of survived worms- ns	0	0	0	0	0
number of worms- np	88	203	86	92	85
total of worms	88	203	86	92	0
% de survie	0	0	0	0	0
moyenne totale of worm	102.286	204.643	93.2857	101.571	74.7857
	wt	lgg-1(tm3489)	lgg-1(GA)	lgg-2(tm5755)	lgg-1(GA) lgg-2(tm5755)
J0	1	1	1	1	1
J2	1	0.8167	0.986667	0.972222	0.957143
J4	0.831461	0.369792	0.84466	0.835052	0.573913
J6	0.823009	0.283333	0.804348	0.817073	0.572519
J8	0.817518	0.0711297	0.817308	0.788991	0.531915
J10	0.808333	0.0285714	0.836735	0.797753	0.32
J12	0.747573	0	0.77451	0.781022	0.261364
J14	0.733333	0	0.685393	0.669643	0.15
J16	0.7	0	0.63	0.646552	0.1
J18	0.65	0	0.35	0.63	0.07
J20	0.315315	0	0.25	0.378947	0.0375
J22	0.21	0	0.17	0.325	0
J24	0.178571	0	0.0923077	0.186813	0
J26	0.06	0	0.0636364	0.0884956	0
J26	0	0	0	0	0
