# Supplementary material for: LGG-1/GABARAP lipidation is not required for autophagy and development in Caenorhabditis elegans
Source: eLife journal article supplement (doi:10.7554/elife.85748), 2023-07-03
Supplement: supp [file Colocalisation-analyses.xlsx]

## Sheet: Feuil1
lgg-1(wt)		Image A	Image B	Pearson's coef	Overlap Coef	Overlap K1	Overlap K2	Overlapcoef using Threshold	Overlap Threshold A	Overlap Threshold B	Overlap K1 Thresholded	Overlap K2 Thresholded	Manders' coef (original) M1	Manders' coef (original) M2	Manders' coef Threshold A	Manders' coef Threshold B	Manders' coef using Threshold M1	Manders' coef using Threshold M2	Costes'automatic threshold image A	Costes'automatic threshold image B	Costes' Pearson's coef	Costes' Pearson's coef Thershold	Costes' M1	Costes' M2
Test 20221109	1	C1-221007_LGG2_SEPAGFP-HZ455-1.lif	C2-221007_LGG2_SEPAGFP-HZ455-1.lif	0.497	0.726	1.580	0.334	0.906	65	114	1.255	0.655	0.999	1	65	114	0.153	0.172	4	15	0.261	0	0.879	0.858
Test 20221116	1	C1-221007_LGG2_SEPAGFP-HZ455-2.lif - Series001-1	C2-221007_LGG2_SEPAGFP-HZ455-2.lif - Series001-1	0.360	0.618	1.598	0.238	0.953	73	121	0.587	1.548	1	0.999	73	121	0.034	0.044	3	25	0.064	0	0.901	0.901
	2	C1-221007_LGG2_SEPAGFP-HZ455-2.lif - Series002-1	C2-221007_LGG2_SEPAGFP-HZ455-2.lif - Series002-1	0.405	0.655	0.998	0.430	0.943	108	89	0.572	1.557	0.999	1.000	108	89	0.223	0.176	3	18	0.296	0	0.943	0.800
	3	C1-221007_LGG2_SEPAGFP-HZ455-2.lif - Series003-1	C2-221007_LGG2_SEPAGFP-HZ455-2.lif - Series003-1	0.446	0.673	1.701	0.266	0.928	71	117	0.750	1.147	1.000	1.000	71	117	0.285	0.142	3	25	0.241	0	0.919	0.911
	4	C1-221007_LGG2_SEPAGFP-HZ455-2.lif - Series004-1	C2-221007_LGG2_SEPAGFP-HZ455-2.lif - Series004-1	0.391	0.600	1.112	0.324	0.945	83	99	0.589	1.515	1.000	1.000	83	99	0.244	0.507	4	22	0.324	0	0.871	0.843
	5	C1-221007_LGG2_SEPAGFP-HZ455-2.lif - Series005-1	C2-221007_LGG2_SEPAGFP-HZ455-2.lif - Series005-1	0.455	0.693	0.906	0.530	0.888	67	58	0.458	1.718	1.000	1.000	67	58	0.127	0.096	4	11	0.239	0	0.885	0.851
	1	C1-220919_LGG2_SEPA1GFP-N2001.lif - Series001-1	C2-220919_LGG2_SEPA1GFP-N2001.lif - Series001-1	0.457	0.637	1.366	0.297	0.889	45	76	0.819	0.965	1	1	45	76	0.399	0.391	4	15	0.393	0	0.737	0.865
	2	C1-220919_LGG2_SEPA1GFP-N2001.lif - Series002-1	C2-220919_LGG2_SEPA1GFP-N2001.lif - Series002-1	0.332	0.623	3.044	0.127	0.890	56	105	1.211	0.655	1	1	56	105	0.408	0.082	4	27	0.218	0	0.661	0.819
	3	C1-220919_LGG2_SEPA1GFP-N2001.lif - Series003-1	C2-220919_LGG2_SEPA1GFP-N2001.lif - Series003-1	0.322	0.628	1.821	0.217	0.861	36	80	0.651	1.138	1	1	36	80	0.312	0.152	4	18	0.237	0	0.704	0.800
	4	C1-220919_LGG2_SEPA1GFP-N2001.lif - Series004-1	C2-220919_LGG2_SEPA1GFP-N2001.lif - Series004-1	0.232	0.573	3.579	0.091	0.919	54	119	0.664	1.273	1	1	54	119	0.205	0.030	255	255	0.000	0	0.000	0.000
	5	C1-220919_LGG2_SEPA1GFP-N2001.lif - Series005-1	C2-220919_LGG2_SEPA1GFP-N2001.lif - Series005-1	0.449	0.661	1.080	0.405	0.871	65	78	0.939	0.807	1	1	65	78	0.232	0.176	4	12	0.309	0	0.845	0.852
lgg-1(ga)
	1	C1-220919_LGG2_SEPA1GFP-RD448001.lif - Series001-1	C2-220919_LGG2_SEPA1GFP-RD448001.lif - Series001-1	0.371	0.531	0.725	0.389	0.865	53	116	0.980	0.764	0.999	1	53	116	0.071	0.213	4	16	0.281	0	0.808	0.740
	2	C1-220919_LGG2_SEPA1GFP-RD448001.lif - Series002-1	C2-220919_LGG2_SEPA1GFP-RD448001.lif - Series002-1	0.377	0.516	1.521	0.175	0.937	58	162	0.926	0.948	0.999	1	58	162	0.328	0.246	3	39	0.313	0	0.867	0.820
	3	C1-220919_LGG2_SEPA1GFP-RD448001.lif - Series003-1	C2-220919_LGG2_SEPA1GFP-RD448001.lif - Series003-1	0.249	0.493	1.293	0.188	0.847	53	112	1.179	0.609	0.999	1	53	112	0.049	0.039	4	22	0.096	0	0.768	0.792
	4	C1-221007_LGG2_SEPAGFP-RD448.lif - Series002-1	C2-221007_LGG2_SEPAGFP-RD448.lif - Series002-1	0.389	0.516	0.834	0.319	0.932	65	114	0.651	1.334	0.999	1	65	114	0.206	0.277	3	20	0.316	0	0.850	0.810
	5	C1-221007_LGG2_SEPAGFP-RD448.lif - Series003-1	C2-221007_LGG2_SEPAGFP-RD448.lif - Series003-1	0.322	0.472	0.910	0.245	0.914	49	117	0.649	1.286	1.000	1	49	117	0.138	0.147	3	23	0.214	0	0.835	0.784
	6	C1-221007_LGG2_SEPAGFP-RD448.lif - Series005-1	C2-221007_LGG2_SEPAGFP-RD448.lif - Series005-1	0.276	0.447	1.003	0.199	0.950	67	132	0.671	1.344	0.999	1	67	132	0.122	0.144	3	40	0.182	0	0.892	0.830
	7	C1-221007_LGG2_SEPAGFP-RD448.lif - Series006	C2-221007_LGG2_SEPAGFP-RD448.lif - Series006	0.276	0.418	1.010	0.173	0.895	46	118	0.667	1.201	0.999	1	46	118	0.082	0.083	4	14	0.185	0	0.456	0.796
	8	C1-221007_LGG2_SEPAGFP-RD448.lif - Series007-1	C2-221007_LGG2_SEPAGFP-RD448.lif - Series007-1	0.259	0.458	0.665	0.315	0.832	49	116	0.781	0.886	0.999	1	49	116	0.020	0.074	3	18	0.184	0	0.855	0.741
	9	C1-221007_LGG2_SEPAGFP-RD448.lif - Series008-1	C2-221007_LGG2_SEPAGFP-RD448.lif - Series008-1	0.220	0.414	1.119	0.153	0.942	55	116	0.577	1.538	0.999	1	55	116	0.079	0.090	3	29	0.150	0	0.754	0.796
	10	C1-221007_LGG2_SEPAGFP-RD448.lif - Series009-1	C2-221007_LGG2_SEPAGFP-RD448.lif - Series009-1	0.369	0.524	0.763	0.360	0.907	65	119	0.714	1.151	1.000	1	65	119	0.132	0.268	3	24	0.293	0	0.916	0.798
	11	C1-221007_LGG2_SEPAGFP-RD448.lif - Series010-1	C2-221007_LGG2_SEPAGFP-RD448.lif - Series010-1	0.299	0.541	1.585	0.184	0.849	49	118	1.286	0.560	0.999	1	49	118	0.098	0.082	4	24	0.162	0	0.746	0.757
	12	C1-221007_LGG2_SEPAGFP-RD448.lif - Series011-1	C2-221007_LGG2_SEPAGFP-RD448.lif - Series011-1	0.262	0.446	0.699	0.284	0.963	53	114	0.540	1.717	1.000	1	53	114	0.035	0.143	3	16	0.249	0	0.767	0.745
	13	C1-221007_LGG2_SEPAGFP-RD448.lif - Series012-1	C2-221007_LGG2_SEPAGFP-RD448.lif - Series012-1	0.388	0.509	0.671	0.386	0.974	60	117	0.561	1.694	1.000	1	60	117	0.090	0.427	3	20	0.365	0	0.866	0.813

## Sheet: Feuil2
	colocalization LGG-2 SEPA-1		Manders' coef using Threshold M1	moyenne	ecart-type	Manders' coef using Threshold M2	moyenne	ecart-type
		ctrl	0.153			0.172
			0.034			0.044
			0.223			0.176
			0.285			0.142
			0.244			0.507
			0.127			0.096
			0.399			0.391
			0.408			0.082
			0.312			0.152
			0.205			0.03
			0.232			0.176
				0.238364	0.111827		0.178909	0.145402
		GA	0.071			0.213
			0.328			0.246
			0.049			0.039
			0.206			0.277
			0.138			0.147
			0.122			0.144
			0.082			0.083
			0.02			0.074
			0.079			0.09
			0.132			0.268
			0.098			0.082
			0.035			0.143
			0.09			0.427
				0.111538	0.0813312		0.171769	0.109814
