# Supplementary material for: LGG-1/GABARAP lipidation is not required for autophagy and development in Caenorhabditis elegans
Source: eLife journal article supplement (doi:10.7554/elife.85748), 2023-07-03
Supplement: supp [file Comptage points et signal cyto IF GABARAP161213 pp22 hmz .xlsx]

## Sheet: Feuil1
BUT : QUANTIFICATIONS IF LGG-1/GABARAP des différents mutants obtenus par CRISPR/Cas9
pp22
161213 - ManipCRISPRlgg-1gabarap GFP Dapi
C3 - GABARAP
C2 - HJM1
160221 RD363- pp22	ab - GABARAP 1/200
comptage 14 bits
161213_22_gabarap_1-D20-G50-DsRed50 embryon en haut à gauche						tardif
B&C 0-16383
nbr de ny compté	53
Stade	environ 80c ?
nombre de points LGG-1 +
sur un stack de 5-35	5
Intensité globale	Area	Mean	Min	Max	IntDen	RawIntDen
plan 15/41	841.316	3658.706	1383	6896	3078127.967	373348984
plan 28/41	841.316	3483.606	1355	6163	2930814.001	355481137
plan 33/41	841.316	3305.696	1369	5700	2781134.772	337326405
signal cytoplasmique	pas utile car ce n'est pas un précoces
plan 15/41
161213_22_gabarap_1-D20-G50-DsRed50 embryon en haut à droite						précoces
B&C 0-16383
nbr de ny compté	3
Stade	4C
nombre de points LGG-1 +
sur un stack de 5-35	3
Intensité globale	Area	Mean	Min	Max	IntDen	RawIntDen
plan 16/41	784.799	3619.840	1363	6031	2840846.618	344568910
plan 26/41	784.799	3673.793	1368	6154	2883189.061	349704664
plan 34/41	784.799	3456.958	1506	5550	2713017.498	329064398
signal cytoplasmique
plan 34/41	82.446	4520.971	3776	5550	372737.775	45209709
plan 11/41	82.446	4715.691	3861	6688	388791.738	47156909.000
plan 26/41	82.446	4802.176	3968	5702	395922.156	48021764.000
161213_22_gabarap_1-D20-G50-DsRed50 embryon en bas à droite						tardif
B&C 0-16383
nbr de ny compté	35
Stade	environ 50 C
nombre de points LGG-1 +
sur un stack de 5-35	4
Intensité globale	Area	Mean	Min	Max	IntDen	RawIntDen
plan 15/41	849.322	3262.395	934	5684	2770822.178	336075581
plan 26/41	849.322	3142.906	961	5662	2669337.857	323766454
plan 11/41	849.322	3214.008	966	6007	2729726.440	331091041
signal cytoplasmique	pas utile car ce n'est pas un précoces
plan 15/41
161213_22_gabarap2-D20-G50-DsRed50 embryon						1C
B&C 0-16383
nbr de ny compté	1 ou 2
Stade	1C
nombre de points LGG-1 + 0
sur un stack de 5-35	0
Intensité globale	Area	Mean	Min	Max	IntDen	RawIntDen
plan 11/39	620.483	3832.294	2305	4815	2377874.531	288414598
plan 19/39	620.483	3838.799	2561	4835	2381910.959	288904180
plan 22/39	620.483	3784.423	2333	4826	2348171.773	284811923
signal cytoplasmique	pas utile car ce n'est pas un précoces
plan 11/39	82.446	4276.977	3463	4811	352621.340	42769768
plan 19/39	82.446	4157.944	3490	4679	342807.522	41579441
plan 22/39	82.446	4086.081	3484	4598	336882.636	40860806
161213_22_gabarap4-D20-G50-DsRed50 embryon						tardif
B&C 0-16383
nbr de ny compté	140
Stade	environ 150 C
nombre de points LGG-1 +
sur un stack de 5-35	20
Intensité globale	Area	Mean	Min	Max	IntDen	RawIntDen
plan 9/40	602.700	3239.469	1835	4937	1952427.000	236811674
plan 20/40	602.700	3551.366	2154	6049	2140407.290	259611977
plan 29/40	602.700	3485.524	2066	5352	2100724.420	254798805
signal cytoplasmique	pas utile car ce n'est pas un précoces
plan 15/41
161213_22_gabarap3-D20-G50-DsRed50 embryon en bas à gauche						tardif
B&C 0-16383
nbr de ny compté	120
Stade
nombre de points LGG-1 +
sur un stack de 5-35	4
Intensité globale	Area	Mean	Min	Max	IntDen	RawIntDen
4	660.734	3740.011	1781	6141	2471151.140	299728204
5	660.734	3845.851	1900	6517	2541083.528	308210368
6	660.734	3768.364	1786	6445	2489884.759	302000422
signal cytoplasmique	pas utile car ce n'est pas un précoces
plan 15/41
161213_22_gabarap3-D20-G50-DsRed50 embryon en haut à droite						précoce
B&C 0-16383
nbr de ny compté	8
Stade
nombre de points LGG-1 +
sur un stack de 5-35	0
Intensité globale	Area	Mean	Min	Max	IntDen	RawIntDen
7	546.249	3095.820	1492	4281	1691087.651	205113583
8	546.249	3191.319	1243	4735	1743253.591	211440838
9	546.249	3115.723	1195	4821	1701959.355	206432222
signal cytoplasmique	pas utile car ce n'est pas un précoces
161213_22_gabarap8						tardif
B&C 0-16383
nbr de ny compté	130
Stade	130
nombre de points LGG-1 +
sur un stack de 5-35	6
Intensité globale	Area	Mean	Min	Max	IntDen	RawIntDen
10	786.819	3997.353	2139	6237	3145193.439	381483417
11	786.819	3930.383	2269	6415	3092499.546	375092126
12	786.819	4012.341	2320	6379	3156986.168	382913768
signal cytoplasmique	pas utile car ce n'est pas un précoces
plan 15/41
161213_22_gabarap9						tardif
B&C 0-16383
nbr de ny compté	123
Stade	150
nombre de points LGG-1 +
sur un stack de 5-35	5
Intensité globale	Area	Mean	Min	Max	IntDen	RawIntDen
10	786.819	3997.353	2139	6237	3145193.439	381483417
11	786.819	3930.383	2269	6415	3092499.546	375092126
12	786.819	4012.341	2320	6379	3156986.168	382913768
signal cytoplasmique	pas utile car ce n'est pas un précoces
plan 15/41
161213_22_gabarap10 en haut à droite						tardif
B&C 0-16383
nbr de ny compté	123
Stade	150
nombre de points LGG-1 +
sur un stack de 5-35	5
Intensité globale	Area	Mean	Min	Max	IntDen	RawIntDen
1	709.666	4397.255	1984	6595	3120580.905	378498140
2	709.666	4440.448	2169	7788	3151233.561	382216029.000
3	709.666	4415.003	2283	7013	3133175.722	380025777.000
signal cytoplasmique	pas utile car ce n'est pas un précoces
plan 15/41
161213_22_gabarap10 en haut à gauche						tardif
B&C 0-16383
nbr de ny compté	123
Stade	150
nombre de points LGG-1 +
sur un stack de 5-35	3
Intensité globale	Area	Mean	Min	Max	IntDen	RawIntDen
1	709.666	4397.255	1984	6595	3120580.905	378498140
2	709.666	4440.448	2169	7788	3151233.561	382216029.000
3	709.666	4415.003	2283	7013	3133175.722	380025777.000
signal cytoplasmique	pas utile car ce n'est pas un précoces
plan 15/41
161213_22_gabarap12						tardif
B&C 0-16383
nbr de ny compté	123
Stade	250
nombre de points LGG-1 +
sur un stack de 5-35	0
Intensité globale	Area	Mean	Min	Max	IntDen	RawIntDen
4	728.406	3037.862	1205	6502	2212795.881	268392056.000
5	728.406	3093.217	1275	4821	2253116.556	273282588.000
6	728.406	2807.821	1263	4152	2045232.790	248068174.000
signal cytoplasmique	pas utile car ce n'est pas un précoces
plan 15/41
161213_22_gabarap13						tardif
B&C 0-16383
nbr de ny compté	50
Stade	80
nombre de points LGG-1 +
sur un stack de 5-35	0
Intensité globale	Area	Mean	Min	Max	IntDen	RawIntDen
7	749.347	2823.995	803	4720	2116152.079	256670040.000
8	749.347	2607.272	924	4482	1953751.501	236972324.000
9	749.347	2651.279	949	4302	1986728.388	240972121.000
signal cytoplasmique	pas utile car ce n'est pas un précoces
plan 15/41
161213_22_gabarap14						précoces
B&C 0-16383
nbr de ny compté	2
Stade	1
nombre de points LGG-1 +
sur un stack de 5-35	0
Intensité globale	Area	Mean	Min	Max	IntDen	RawIntDen
10	607.341	4981.451	2526	7483	3025441.535	366958598.000
11	607.341	4813.091	2546	7533	2923189.688	354556377.000
12	607.341	4379.767	2325	6840	2660013.549	322635500.000
signal cytoplasmique
13	82.446	5877.270	4066	7746	484559.795	58772705.000
14	82.446	5298.865	4058	7140	436872.352	52988651.000
15	82.446	5451.659	4570	6815	449469.675	54516592.000
