# Supplementary material for: LGG-1/GABARAP lipidation is not required for autophagy and development in Caenorhabditis elegans
Source: eLife journal article supplement (doi:10.7554/elife.85748), 2023-07-03
Supplement: supp [file Comptage points et signal cyto IF GABARAP161213 pp65 hmz G116A .xlsx]

## Sheet: Feuil1
BUT : QUANTIFICATIONS IF LGG-1/GABARAP des différents mutants obtenus par CRISPR/Cas9
pp65
161213 - ManipCRISPRlgg-1gabarap GFP Dapi
C3 - GABARAP
C2 - HJM1
160221 RD363- pp22	ab - GABARAP 1/200
comptage 14 bits
161213_65_gabarap_1R en bas à gauche						2C
B&C 0-16383
nbr de ny compté	2C
Stade	2C
nombre de points LGG-1 +
sur un stack de 5-35	0
Intensité globale	Area	Mean	Min	Max	IntDen	RawIntDen
17	714.077	3920.892	1332	5566	2799816.961	339592385.000
18	714.077	4040.126	1372	5807	2884959.045	349919347.000
19	714.077	3955.103	1358	5676	2824245.862	342555389.000
signal cytoplasmique	car le cluster ds un N2
20	82.446	4373.344	3698	5612	360566.493	43733443.000
21	82.446	4371.079	3403	5321	360379.744	43710792.000
22	82.446	4636.949	3605	5742	382299.736	46369488.000
161213_65_gabarap_2R en haut à droite						30C
B&C 0-16383
nbr de ny compté	23C
Stade	30 C
nombre de points LGG-1 +
sur un stack de 5-35	0
Intensité globale	Area	Mean	Min	Max	IntDen	RawIntDen
23	616.336	3556.122	1463	5625	2191767.201	265841468.000
24	616.336	3578.128	1489	5650	2205330.285	267486547.000
25	616.336	3224.206	1447	4750	1987195.067	241028725.000
161213_65_gabarap_2R en bas à gauche						2C
B&C 0-16383
nbr de ny compté	2C
Stade	2C
nombre de points LGG-1 +
sur un stack de 5-35	0
Intensité globale	Area	Mean	Min	Max	IntDen	RawIntDen
27	681.213	5528.468	2541	8420	3766066.632	456789700.000
28	681.213	5433.088	2213	8427	3701092.479	448908925.000
29	681.213	5332.839	2430	7743	3632801.434	440625841.000
signal cytoplasmique	car le cluster ds un N2
30	82.446	6773.241	5711	8097	558429.337	67732410.000
31	82.446	6574.286	5540	8201	542026.213	65742860.000
32	82.446	5249.301	2637	7769	432786.011	52493015.000
161213_65_gabarap_3R en haut à gauche						8C
B&C 0-16383
nbr de ny compté
Stade
nombre de points LGG-1 +
sur un stack de 5-35	1
Intensité globale	Area	Mean	Min	Max	IntDen	RawIntDen
1	521.869	4797.515	2148	7034	2503675.635	303673130
2	521.869	5046.324	2493	7497	2633521.319	319422233
3	521.869	5020.238	2729	6976	2619907.489	317770999
signal cytoplasmique	car le cluster ds un N2
13	82.446	5546.266	4596	6563	457269.649	55462658
14	82.446	5303.024	4051	6763	437215.205	53030236.000
15	82.446	5554.152	4172	8626	457919.821	55541518.000
161213_65_gabarap_3R en haut à droite						4C
B&C 0-16383
nbr de ny compté
Stade
nombre de points LGG-1 +
sur un stack de 5-35	0
Intensité globale	Area	Mean	Min	Max	IntDen	RawIntDen
4	614.490	5162.774	1892	7814	3172470.517	384791879
5	614.490	5058.007	1793	8032	3108092.328	376983389
6	614.490	4868.475	1892	7829	2991626.680	362857163
signal cytoplasmique	car le cluster ds un N2
16	82.446	5890.529	4789	7200	485652.943	58905294.000
17	82.446	5825.122	3780	7588	480260.363	58251223.000
18	82.446	5913.110	3376	7589	487514.657	59131103.000
161213_65_gabarap_3R en bas à gauche						250C
B&C 0-16383
nbr de ny compté
Stade
nombre de points LGG-1 +
sur un stack de 5-35	1
Intensité globale	Area	Mean	Min	Max	IntDen	RawIntDen
10	561.749	5151.893	2088	8239	2894068.490	351024240
11	561.749	5031.487	1833	8476	2826430.321	342820344
12	561.749	4968.737	1981	7334	2791180.519	338544863
161213_65_gabarap_4R						300C
B&C 0-16383
nbr de ny compté	260
Stade
nombre de points LGG-1 +
sur un stack de 5-35	1
Intensité globale	Area	Mean	Min	Max	IntDen	RawIntDen
10	561.749	5151.893	2088	8239	2894068.490	351024240
11	561.749	5031.487	1833	8476	2826430.321	342820344
12	561.749	4968.737	1981	7334	2791180.519	338544863
161213_65_gabarap_5R en haut à droite						15C
B&C 0-16383
nbr de ny compté	14
Stade	15
nombre de points LGG-1 +
sur un stack de 5-35	1
Intensité globale	Area	Mean	Min	Max	IntDen	RawIntDen
4	608.652	3915.069	1913	5625	2382915.749	289026052
5	608.652	3861.095	1447	5963	2350064.445	285041487
6	608.652	3850.999	2001	5485	2343919.542	284296166
signal cytoplasmique	car le cluster ds un N2
7	82.446	4327.125	3595	5445	356755.854	43271247
8	82.446	4632.875	3823	5383	381963.857	46328749
9	82.446	4760.155	3596	5638	392457.651	47601551
161213_65_gabarap_5R enbas à gauche						2C
B&C 0-16383
nbr de ny compté	14
Stade	15
nombre de points LGG-1 +
sur un stack de 5-35	0
Intensité globale	Area	Mean	Min	Max	IntDen	RawIntDen
1	573.159	3771.309	1973	5299	2161560.142	262177626
2	573.159	3554.284	1754	5191	2037170.431	247090283
3	573.159	3828.431	2207	5510	2194300.441	266148727
signal cytoplasmique	car le cluster ds un N2
11	82.446	4480.056	3349	5307	369364.522	44800564.000
12	82.446	4326.145	3404	5270	356675.073	43261449.000
13	82.446	4082.706	3372	4929	336604.395	40827058.000
161213_65_gabarap_5R enbas à gauche						8C
B&C 0-16383
nbr de ny compté	14
Stade	15
nombre de points LGG-1 +
sur un stack de 5-35	1
Intensité globale	Area	Mean	Min	Max	IntDen	RawIntDen
1	573.159	3771.309	1973	5299	2161560.142	262177626
2	573.159	3554.284	1754	5191	2037170.431	247090283
3	573.159	3828.431	2207	5510	2194300.441	266148727
signal cytoplasmique	car le cluster ds un N2
11	82.446	4480.056	3349	5307	369364.522	44800564.000
12	82.446	4326.145	3404	5270	356675.073	43261449.000
13	82.446	4082.706	3372	4929	336604.395	40827058.000
161213_65_gabarap_7R						50C
B&C 0-16383
nbr de ny compté	44
Stade	50 C
nombre de points LGG-1 +
sur un stack de 5-35	3
Intensité globale	Area	Mean	Min	Max	IntDen	RawIntDen
14	485.552	3714.880	1484	5333	1803765.744	218780413.000
15	485.552	3780.365	1728	6180	1835561.998	222637010.000
16	485.552	3630.077	1436	5501	1762589.464	213786104.000
161213_65_gabarap_7R						50 C
B&C 0-16383
nbr de ny compté	48
Stade	50 C
nombre de points LGG-1 +
sur un stack de 5-35	2
Intensité globale	Area	Mean	Min	Max	IntDen	RawIntDen
18	517.145	3935.768	1663	5853	2035362.670	246871018.000
19	517.145	3891.355	1679	5808	2012395.123	244085263.000
20	517.145	3756.896	1395	5430	1942860.035	235651288.000
161213_65_gabarap_9R						1C
B&C 0-16383
nbr de ny compté	2
Stade
nombre de points LGG-1 +
sur un stack de 5-35	0
Intensité globale	Area	Mean	Min	Max	IntDen	RawIntDen
1	531.210	3628.725	2199	4844	1927616.314	233802363
2	531.210	3683.603	1783	4999	1956768.487	237338257
3	531.210	3619.958	1890	4917	1922959.263	233237505
signal cytoplasmique	car le cluster ds un N2
10	82.446	3738.122	3220	4363	308194.735	37381224.000
11	82.446	4024.324	3442	4929	331791.051	40243243.000
12	82.446	4124.365	3594	5064	340039.022	41243647.000
161213_65_gabarap_9R						1C
B&C 0-16383
nbr de ny compté	2
Stade
nombre de points LGG-1 +
sur un stack de 5-35	0
Intensité globale
4	427.031	4230.385	2433	6106	1806505.990	219112780.000
5	427.031	4482.391	2174	6266	1914120.407	232165432.000
6	427.031	4478.914	2126	6170	1912635.737	231985355.000
signal cytoplasmique	car le cluster ds un N2
13	82.446	5000.594	4024	5866	412280.973	50005940.000
14	82.446	5191.330	3999	7139	428006.453	51913298.000
15	82.446	5122.535	4088	6312	422334.570	51225350.000
161213_65_gabarap_9R						2C
B&C 0-16383
nbr de ny compté	2
Stade
nombre de points LGG-1 +
sur un stack de 5-35	0
Intensité globale
7	519.561	3221.724	2072	4677	1673880.997	203026572.000
8	519.561	3182.267	1760	4294	1653380.848	200540090.000
9	519.561	3191.195	2066	4435	1658019.760	201102748.000
signal cytoplasmique	car le cluster ds un N2
16	82.446	3592.997	3182	4238	296229.643	35929967.000
17	82.446	3542.836	3136	4294	292094.107	35428364.000
18	82.446	3505.379	3015	4233	289005.871	35053789.000
161213_65_gabarap_10R						1
B&C 0-16383
nbr de ny compté	2
Stade	1C
nombre de points LGG-1 +
sur un stack de 5-35	0
Intensité globale
1	495.750	4576.437	2559	6744	2268769.343	275181129
2	495.750	4039.202	1955	6186	2002435.416	242877241
3	495.750	4310.336	1981	6416	2136850.190	259180533
signal cytoplasmique	car le cluster ds un N2
4	82.446	5056.451	3311	6416	416886.206	50564513
5	82.446	5190.777	3772	6416	427960.869	51907769
6	82.446	5398.382	3520	6611	445077.178	53983822
161213_65_gabarap_11R						4C
B&C 0-16383
nbr de ny compté	2
Stade	1C
nombre de points LGG-1 +
sur un stack de 5-35	0
Intensité globale
1	505.586	3904.522	1771	6532	1974071.662	239436975
2	505.586	3768.102	1607	5958	1905099.889	231071325
3	505.586	3792.268	1836	6126	1917317.596	232553222
signal cytoplasmique	car le cluster ds un N2
4	82.446	4486.841	2971	6126	369923.871	44868408
5	82.446	4664.759	2923	6123	384592.603	46647592.000
6	82.446	4546.204	2872	6048	374818.170	45462042.000
161213_65_gabarap_12R						12C
B&C 0-16383
nbr de ny compté	2
Stade	1C
nombre de points LGG-1 +
sur un stack de 5-35	1
Intensité globale
7	400.137	3680.728	2070	5058	1472796.024	178636790.000
8	400.137	3725.274	2270	4916	1490620.268	180798709.000
9	400.137	3593.335	2357	4683	1437826.878	174395350.000
signal cytoplasmique	car le cluster ds un N2
10	82.446	3634.963	2361	4520	299689.589	36349627.000
11	82.446	3806.467	1997	4877	313829.484	38064668.000
12	82.446	4232.414	3633	5173	348947.298	42324140.000
