# Supplementary material for: LGG-1/GABARAP lipidation is not required for autophagy and development in Caenorhabditis elegans
Source: eLife journal article supplement (doi:10.7554/elife.85748), 2023-07-03
Supplement: supp [file Comptage points et signal cyto IF GABARAP161213 pp66 hmz .xlsx]

## Sheet: Feuil1
BUT : QUANTIFICATIONS IF LGG-1/GABARAP des différents mutants obtenus par CRISPR/Cas9
pp66
161213 - ManipCRISPRlgg-1gabarap GFP Dapi
C3 - GABARAP
C2 - HJM1
pp66	ab - GABARAP 1/200
comptage 14 bits
161213_66_gabarap_1R en bas à droite						2C
B&C 0-16383
nbr de ny compté	3
Stade	2C
nombre de points LGG-1 +
sur un stack de 5-35	0
Intensité globale	Area	Mean	Min	Max	IntDen	RawIntDen
13	546.125	6227.491	3970	8711	3400988.325	412509015.000
14	546.125	6045.971	3813	8336	3301855.392	400485090.000
15	546.125	5726.499	3614	7729	3127383.854	379323276.000
signal cytoplasmique zone de 100 par 100	car le cluster ds un N2
19	82.446	6059.537	4578	7518	499586.978	60595366.000
20	82.446	5738.818	4304	7222	473144.917	57388184.000
21	82.446	6933.222	5524	8599	571619.203	69332221.000
161213_66_gabarap_1R en bas à droite						2C
B&C 0-16383
nbr de ny compté	25
Stade	30
nombre de points LGG-1 +
sur un stack de 5-35	0
Intensité globale	Area	Mean	Min	Max	IntDen	RawIntDen
16	516.370	5745.245	3443	8093	2966672.439	359830440.000
17	516.370	5685.808	3578	8526	2935980.893	356107834.000
18	516.370	5507.904	3458	7858	2844116.888	344965564.000
161213_66_gabarap_3R en haut à droite						1C
B&C 0-16383
nbr de ny compté	2
Stade	1C
nombre de points LGG-1 +
sur un stack de 5-35	0
Intensité globale	Area	Mean	Min	Max	IntDen	RawIntDen
22	613.376	2985.729	1456	4355	1831375.700	222129250.000
23	613.376	2995.444	1421	4364	1837335.132	222852075.000
24	613.376	2808.064	1350	4155	1722400.522	208911550.000
signal cytoplasmique zone de 100 par 100
25	82.446	2822.117	1657	3975	232673.428	28221175.000
26	82.446	3457.358	2691	4155	285046.704	34573578.000
27	82.446	3644.087	2986	4503	300441.887	36440874.000
161213_66_gabarap_3R en bas à gauche						4C
B&C 0-16383
nbr de ny compté	4
Stade	4C
nombre de points LGG-1 +
sur un stack de 5-35	0
Intensité globale	Area	Mean	Min	Max	IntDen	RawIntDen
28	623.369	2794.657	1217	4703	1742102.523	211301224.000
29	623.369	2804.553	1073	4304	1748271.089	212049415.000
30	623.369	2691.525	1166	4519	1677813.344	203503530.000
signal cytoplasmique zone de 100 par 100
31	82.446	3559.331	2783	4824	293454.044	35593312.000
32	82.446	3136.452	2117	4649	258589.209	31364524.000
33	82.446	2730.521	1422	3824	225121.627	27305210.000
161213_66_gabarap_4 en bas à gauche						2C
B&C 0-16383
nbr de ny compté	3
Stade	2C
nombre de points LGG-1 +
sur un stack de 5-35	0
Intensité globale	Area	Mean	Min	Max	IntDen	RawIntDen
1	614.564	2634.709	1500	3701	1619196.781	196393873
2	614.564	2560.955	1654	3434	1573869.713	190896111
3	614.564	2439.722	1540	3205	1499364.896	181859353
signal cytoplasmique zone de 100 par 100
4	82.446	2720.288	2269	3205	224277.977	27202883
5	82.446	2663.554	2292	3122	219600.447	26635541
6	82.446	2904.246	2269	3505	239444.594	29042456.000
161213_66_gabarap_4 en haut à droite						4C
B&C 0-16383
nbr de ny compté	4
Stade	4C
nombre de points LGG-1 +
sur un stack de 5-35	0
Intensité globale	Area	Mean	Min	Max	IntDen	RawIntDen
7	654.245	2552.794	1188	3770	1670153.422	202574451.000
8	654.245	2482.461	1099	3709	1624137.852	196993180.000
9	654.245	2529.459	1150	3729	1654886.451	200722706.000
signal cytoplasmique zone de 100 par 100
10	82.446	3002.062	2102	3710	247509.246	30020625.000
11	82.446	3068.740	2254	3682	253006.599	30687404.000
12	82.446	3054.328	2291	3717	251818.332	30543278.000
161213_66_gabarap-6						250
B&C 0-16383
nbr de ny compté	?
Stade	250
nombre de points LGG-1 +
sur un stack de 5-35	0
Intensité globale	Area	Mean	Min	Max	IntDen	RawIntDen
13	658.475	2880.398	1105	5125	1896668.821	230048713.000
14	658.475	2776.033	1100	5992	1827947.686	221713463.000
15	658.475	2724.669	1195	5135	1794125.575	217611148.000
161213_66_gabarap-7						350
B&C 0-16383
nbr de ny compté	?
Stade	300
nombre de points LGG-1 +
sur un stack de 5-35	0
Intensité globale	Area	Mean	Min	Max	IntDen	RawIntDen
17	688.757	4967.394	2010	10613	3421328.339	414976074.000
18	688.757	4677.377	2015	9792	3221577.168	390748070.000
19	688.757	5095.765	2144	10169	3509744.814	425700190.000
