# Supplementary material for: LGG-1/GABARAP lipidation is not required for autophagy and development in Caenorhabditis elegans
Source: eLife journal article supplement (doi:10.7554/elife.85748), 2023-07-03
Supplement: supp [file Comptage points et signal cyto IF LGG-1 61213 pp142 hmz .xlsx]

## Sheet: Feuil1
	en haut a gauche	en haut à droite	en haut à droite
7658	0	1	0
7659	0	0	0
7660	0	0
7661	2	2
7662	0	0	7
7663	0	2
