# Supplementary material for: LGG-1/GABARAP lipidation is not required for autophagy and development in Caenorhabditis elegans
Source: eLife journal article supplement (doi:10.7554/elife.85748), 2023-07-03
Supplement: supp [file corps apoptotic number.xlsx]

## Sheet: Feuil1
																								lgg-1(tm3489)
lgg-1(GA)	Number of apototic corpses				lgg-1(tm3489)	Number of apototic corpses			N2	Number of apototic corpses													Exp-6498	7	Obs: corps apoptotique plus gros et plus allongés
Exp 6335	7				Exp 6321	5			Exp-6346	9				GA	tm	N2							Exp-6502	13
Exp 6336	7				Exp 6379	6			Exp-6347	10				7	9	10							Exp-6503	7
Exp 6337	5				Exp 6377	9			Exp-6348	9				7	16	9							Exp-6507	15
Exp 6338	8				Exp 6367	16			Exp-6349	9				5	13	9							Exp-6509	8
Exp 6339	4				Exp 6376	13			Exp-6353	10				8	17	10							Exp-64510	11
Exp 6343	7				Exp6375	10			Exp-6354	11				7	12	11							Exp-64511	13
Exp6363	8				Exp 6374	17			Exp-6355	8				8	12	8							Exp-64512	7
Exp 6364	6				Exp 6373	12			Exp-6356	13				6	12	13							Exp-64514	8
Exp 6366	8				Exp 6372	12			Exp-6357	10				8	14	10							Exp-64515	11
Exp 6367	4				Exp 6371	12			Exp-6358	8				11	9	8							Exp-64516	9
Exp 6368	11				Exp 6370	8			Exp-6359	8				8		8							Exp-64522	10
Exp 6369	8				Exp 6369	14			Exp-6407	14				11		14							Exp-64523	11
Exp 6370	11				Exp 6368	9			Exp-6409	8				10		8							Exp-64524	8
Exp 6371	10				Exp 6498				Exp-6408	11				7		11							Exp-64526	10
Exp 6372	7								Exp-6410	9				5		8							Exp-64527	11
Exp 6373	5								Exp-6411	8				5		11							Exp-64528	12
Exp 6376	5								Exp-6412	11				10		10
Exp 6379-1	10								Exp-6414	10				8		11
Exp 6379-2	8								Exp-6417	11				6		10
Exp 6380	6								Exp 6422	10				6
Exp 6383	6													9
Exp 6384	6								moyenne	9.85				8
Exp 6386	9													7
Exp 6387	8												Moyenne	7.59091	12.6667	9.94444
Exp 6388	7													GA	tm	N2
moyenne	7.24
TEST DE FISHER	#REF!													N2	lgg-1(tm3489)	lgg-1(GA)
H0: les variances sont lesmêmes													Moyenne	9.94444	12.6667	7.59091
alpha obs GA/tm	0.113461	> 0,05 --> risque de se tromper en rejetant H0 est gd --> donc pas de diff de variance
alpha obs GA/N2	0.898435	> 0,05 donc pas de diff de variance
alpha obs N2/tm	0.106507	> 0,05 donc pas de diff de variance
> les variances ne sont pas significativement différentes.
test de comparaison des moyennes Student de type 2
si on a des petits effectifs n<30
Si les données sont non appariées
et que les variances ne sont pas significativement différente -->
TEST DE STUDENT DE TYPE 2 :			--> les 2 médicaments ne sont pas différents
alpha obs GA/tm	1.13976e-06	< 0,05 --> risque de se tromper en rejetant H0 est petit--> significativement différent
alpha obs GA/N2	0.000156415	< 0,05 --> risque de se tromper en rejetant H0 est petit--> significativement différent
alpha obs N2/tm	0.00404514	< 0,05 --> risque de se tromper en rejetant H0 est petit--> significativement différent

## Sheet: Bilan corps apoptotiques 
			lgg-1(tm3489)							lgg-1(GA)	1.25						N2		1.25			llgg-1(G116AG117STOP)
					1.25			Comma Stage			1,5 F stage			1	Comma Stage				1,5 F stage				1,25 F		1,5 F
		Comma Stage			1,5 F stage		1	Exp 6335	7	1	Exp 6406	7		2	Exp-6346	9		Exp 6356	13		Exp7032	8
1	Exp-6498	7	1	Exp-6507	15		2	Exp 6338	7	2	Exp 6336	7		3	Exp-6347	10		Exp 6348	8		Exp7039 e1	16		Exp7033	21
2	Exp-6502	13	2	Exp-6511	13		3	Exp 6405	5	3	Exp 6343	7		4	Exp-6355	8		Exp 6349	9		Exp7042e1	16		Exp 7034	17
3	Exp-6503	7	3	Exp-6515	11		4	Exp 6337	5	4	Exp 6363	8		5	Exp-6353	10		Exp 6357	10		Exp7046	13		Exp 7035	24
4	Exp-6509	8	4	Exp-6516			5	Exp 6403	5	5	Exp 6366	8		6	Exp-6354	11		Exp 6409	8		moyenne	13.25		Exp 7036	24
5	Exp-6512	7	5	Exp-6527	11		6	Exp 6402	6	6	Exp 6368	12		7	Exp 6458	8		Exp6414	10					Exp 7038	17
6	Exp-6514	8	6	Exp-6528	12		7	Exp 6339	4	7	Exp 6369	8		8	Exp 6459	8		Exp-6408	11					Exp 7039 e2	21
7	Exp-6523	11	7	Exp 6373	12		8	Exp 6364	6	8	Exp 6370	11		9	Exp 6410	9		Exp 6429	9					Exp 7040	26
8	Exp-6524	8	8	Exp 6372	12		9	Exp 6372	7	9	Exp 6371	11		10	Exp 6412	11		moyenne	9.75					Exp 7041	19
9	Exp-6526	10	9	Exp 6371			10	Exp 6373	5	10	Exp 6379-1	10		11	Exp 6417	11								Exp 7044	17
10	Exp 6368	9	10	Exp 6376	13		11	Exp 6376	5	11	Exp 6379-2	8		12	Exp 6422	10								exp7047	16
11	Exp 6367	16	11	Exp 6510	11		12	Exp 6381	6	12	Exp 6380	10		13	Exp 6428	12								moy	20.2
12	Exp-6368	9	12	Exp 6522			13	Exp 6383	6	13	Exp 6386	9		14	Exp 6427	8
13	Exp 6543	10	13	Exp 6374	17		14	Exp 6384	6	14	Exp 6400-2	8		15	Exp 6426	7
14	Exp 6545	7	14	Exp 6369	14		15	Exp 6387	8	15	Exp 6398	4		16	moyenne	9.42857
15	Exp 6547	15	15	Exp 6533	13		16	Exp 6400-1	6	16	Exp 6388	7		17
16	Exp 6548-2	12	16	Exp 6534	16		17	Exp6399	5	17	Exp 6391	6		18
17	Exp 6549	17	17	Exp 6535	12		18	Exp 6397	5	18	Exp 6390	6		19
18	Exp 6552	11	18	Exp 6536	13		19	Exp 6396	4	19	Exp 6389	7		20
	moyenne	10.2778	19	Exp 6537	17		20	Exp 6395	3	20	Exp 6558	5		21
			20	Exp 6538	13		21	Exp 6394	5	20	Exp 6559	5		22
			21	Exp 6539			22	Exp 6393	4	21	Exp 6564	13		23
			22	Exp 6540			23	Exp 6560	11		moyenne	8.04545		24
			23	Exp 6541			24	Exp 6562	15					25
			24	Exp 6542	15		25	Exp 6563	8
			25	Exp 6544	12		moyenne		6.16
			26	Exp 6546	14
			27	Exp 6548-1	16
			28	Exp 6550	15
			29	Exp 6551	13
			30	Exp 6554	16
				moyenne	13.5833
moyenne CA comma stage
	N2	lgg-1(tm3489)	lgg-1(GA)	llgg-1(G116AG117STOP)
	9.42857	10.2778	6.16	13.25
moyenne CA 1,5 F
	N2	lgg-1(tm3489)	lgg-1(GA)	llgg-1(G116AG117STOP)
	9.75	13.5833	8.04545	20.2
