# Supplementary material for: LGG-1/GABARAP lipidation is not required for autophagy and development in Caenorhabditis elegans
Source: eLife journal article supplement (doi:10.7554/elife.85748), 2023-07-03
Supplement: supp [file datasources figure S5-B.xlsx]

## Sheet: Feuil1
%	activité ALP t=0
		WT	atg1Δ	atg8Δ	Atg8-GA clones1&2	Pho8Δ60-atg8-G/A-ΔR clones1&2
exp du 12/03/2020		2.159	2.53641	3.40354	3.99385	2.87493
exp du 26/05/2020		7.83086	4.98591	6.68512	6.68006	5.3233
exp du 22/06/2020		3.01158	2.96703	3.50349	4.39759	3.56952
exp du 12/03/2020					3.03889	2.26551
exp du 26/05/2020					6.33115	5.84744
exp du 22/06/2020					2.49712	3.40793
moyenne		4.33382	3.49645	4.53072	4.48978	3.88144
écart-type		3.05839	1.30776	1.86644	1.70401	1.4064
Mann-Whitney/WT t0			NS	NS	NS	NS
	activité ALP t=4h
		Pho8Δ60	Pho8Δ60-atg1Δ	Pho8Δ60-atg8Δ	Atg8-GA clones1&2	Pho8Δ60-atg8-G/A-ΔR clones1&2
exp du 12/03/2020		100	4.28875	4.78673	4.78739	2.6695
exp du 26/05/2020		100	4.91844	5.95903	7.66342	12.6951
exp du 22/06/2020		100	3.23786	4.3798	1.7327	10.162
exp du 12/03/2020					5.58798	6.7448
exp du 26/05/2020					9.60898	10.0269
exp du 22/06/2020					3.32975	8.3587
moyenne		100	4.14835	5.04185	5.4517	8.44282
écart-type		0	0.849042	0.81994	2.86245	3.4574
Mann-Whitney/WT 4h			****p<0,001	****p<0,001	****p<0,001	****p<0,001
Mann-Whitney/ t0		****p<0,001	NS	NS	NS	NS
	moyenne ALP
		WT	atg1Δ	atg8Δ	Atg8 G116A	Atg8 G116AR117*
	t=0	4.33382	3.49645	4.53072	4.48978	3.88144
	t=4h	100	4.14835	5.04185	5.5	8.4
	écart-type t0	3.1	1.3	1.9	1.7	1.4
	écart-type 4h	0	0.8	0.8	2.9	3.5
