# Supplementary material for: LGG-1/GABARAP lipidation is not required for autophagy and development in Caenorhabditis elegans
Source: eLife journal article supplement (doi:10.7554/elife.85748), 2023-07-03
Supplement: supp [file datasources figure S5-E.xlsx]

## Sheet: Feuil1
		manip du 29/1/21 recomptage						manip du 15/4						manip du 22/4						manip du 23/4
		total	1 à 4 vacuoles	vacuoles >4	%	%		total	1 à 4 vacuoles	vacuoles >4	%	%		total	1 à 4 vacuoles	vacuoles >4	%	%		total	1 à 4 vacuoles	vacuoles >4	%	%
BY4742	YPG	49	41	8	83.6735	16.3265		50	46	4	92	8		57	48	9	84.2105	15.7895		54	44	10	81.4815	18.5185
	H2O 5min	42	37	5	88.0952	11.9048		54	53	1	98.1481	1.85185		53	52	1	98.1132	1.88679		62	55	7	88.7097	11.2903
	H2O 1hr	52	43	9	82.6923	17.3077		58	55	3	94.8276	5.17241		0			#DIV/0!	#DIV/0!		0			#DIV/0!	#DIV/0!
Δatg8	YPG	55	21	34	38.1818	61.8182		52	24	28	46.1538	53.8462		66	34	32	51.5152	48.4848		56	34	22	60.7143	39.2857
	H2O 5min	59	36	23	61.0169	38.9831		57	42	15	73.6842	26.3158		66	48	18	72.7273	27.2727		56	49	7	87.5	12.5
	H2O 1hr	58	35	23	60.3448	39.6552		73	62	11	84.9315	15.0685		0			#DIV/0!	#DIV/0!		0			#DIV/0!	#DIV/0!
atg8G/A	YPG	59	41	18	69.4915	30.5085		58	42	16	72.4138	27.5862		62	49	13	79.0323	20.9677		59	39	20	66.1017	33.8983
	H2O 5min	51	44	7	86.2745	13.7255		59	51	8	86.4407	13.5593		54	50	4	92.5926	7.40741		57	51	6	89.4737	10.5263
	H2O 1hr	49	43	6	87.7551	12.2449		77	60	17	77.9221	22.0779		0			#DIV/0!	#DIV/0!		0			#DIV/0!	#DIV/0!
atg8G/AΔR	YPG	57	44	13	77.193	22.807		55	25	30	45.4545	54.5455	??	74	46	28	62.1622	37.8378		50	39	11	78	22
	H2O 5min	47	44	3	93.617	6.38298		54	50	4	92.5926	7.40741		60	46	14	76.6667	23.3333		50	41	9	82	18
	H2O 1hr	60	43	17	71.6667	28.3333		61	54	7	88.5246	11.4754		0			#DIV/0!	#DIV/0!		0			#DIV/0!	#DIV/0!
			YPG-1	YPG-2	YPG-3	YPG-4	moyenne	ET		H2O 5min-1	H2O 5min-2	H2O 5min-3
		BY4742	16.3265	8	15.8	18.5	14.6566	4.58905	BY4742	11.9048	1.85185	1.89
		Δatg8	61.8182	53.8462	48.5	39.3	50.8661	9.45519	Δatg8	38.9831	26.3158	27.27
		atg8G/A	30.5085	27.5862	21	33.9	28.2487	5.47803	atg8G/A	13.7255	13.5593	7.41
		atg8G/AΔR	22.807		37.8	22	27.5357	8.89832	atg8G/AΔR	6.38298	7.40741	23.33
											% of exponentially growing cells with >4 vacuoles	ET
										WT	14.6566	4.58905
						contre WT	p-value : 4.9749628103284E-8			atg8Δ	50.8661	9.45519
			contre delta	p-value : 0.0010279523271063		contre WT	p-value : 0.020040754845882			Atg8 G/A	28.2487	5.47803
			contre delta	p-value : 0.00070079232148727		contre WT	p-value : 0.026536137164867			Atg8 G/A ΔR	27.5357	8.89832
