# Supplementary material for: LGG-1/GABARAP lipidation is not required for autophagy and development in Caenorhabditis elegans
Source: eLife journal article supplement (doi:10.7554/elife.85748), 2023-07-03
Supplement: supp [file datasources figure S5-F.xlsx]

## Sheet: Feuil1
BY4742+p416									Δatg8+LGG1
	nbr de jrs	0	3	4	5	6				nbr de jrs	0	3	4	5	6
test de viabilité 020721		100	123.232	113.131	180.808	176.768			test de viabilité 020721		100	95.6522	50.7246	23.1884	17.3913
test de viabilité 230721		100	156.098	165.854	173.171	175.61			test de viabilité 230721		100	80.597	50.7463	20.8955	4.47761
moyenne		100	139.665	139.492	176.989	176.189			moyenne		100	88.1246	50.7355	22.042	10.9345
écart-type		0	23.2392	37.2803	5.40042	0.818774			écart-type		0	10.6456	0.0152954	1.62131	9.13136
MW/Δatg8+p416 (3+6)			****p<0,001	****p<0,001	****p<0,001	****p<0,001			MW/WT (3+6)			****p<0,001	****p<0,001	****p<0,001	****p<0,001
									MW/Δatg8+p416 (3+6)			****p<0,001	****p<0,001	****p<0,001	NS
Δatg8+p416									Δatg8+LGG1-GA
	nbr de jrs	0	3	4	5	6				nbr de jrs	0	3	4	5	6
test de viabilité 020721		100	77.1739	29.3478	9.78261	6.52174			test de viabilité 020721		100	50.8333	52.5	25.8333	15
test de viabilité 230721		100	44.4444	9.72222	2.77778	0			test de viabilité 230721		100	75.3623	34.7826	8.69565	5.7971
moyenne		100	60.8092	19.535	6.28019	3.26087			moyenne		100	63.0978	43.6413	17.2645	10.3986
écart-type		0	23.1432	13.8774	4.95316	4.61157			écart-type		0	17.3446	12.5281	12.1182	6.50743
MW/WT (3+6)			****p<0,001	****p<0,001	****p<0,001	****p<0,001			MW/WT (3+6)			****p<0,001	****p<0,001	****p<0,001	****p<0,001
									MW/Δatg8+p416 (3+6)			NS	****p<0,001	NS	NS
Δatg8+ATG8									Δatg8+LGG1-GAG*
	nbr de jrs	0	3	4	5	6				nbr de jrs	0	3	4	5	6
test de viabilité 020721		100	102.649	94.702	91.3907	94.702			test de viabilité 020721		100	16.0377	2.83019	4.71698	6.60377
test de viabilité 230721		100	205.556	203.704	192.593	188.889			test de viabilité 230721		100	64.6154	7.69231	3.07692	1.53846
moyenne		100	154.102	149.203	141.992	141.795			moyenne		100	40.3266	5.26125	3.89695	4.07112
écart-type		0	72.7659	77.0759	71.5605	66.6002			écart-type		0	34.3496	3.43804	1.1597	3.58172
MW/WT (3+6)			NS	NS	NS	NS			MW/WT (3+6)			****p<0,001	****p<0,001	****p<0,001	****p<0,001
MW/Δatg8+p416 (3+6)			****p<0,001	****p<0,001	****p<0,001	****p<0,001			MW/Δatg8+p416 (3+6)			NS	****p<0,001	NS	NS
		0	3	4	5	6				0	3	4	5	6
	BY4742+p416	100	139.665	139.492	176.989	176.189			Δatg8+p416	100	60.8092	19.535	6.28019	3.26087
	Δatg8+p416	100	60.8092	19.535	6.28019	3.26087			Δatg8+LGG1	100	88.1246	50.7355	22.042	10.9345
	Δatg8+ATG8	100	154.102	149.203	141.992	141.795			Δatg8+LGG1-GA	100	63.0978	43.6413	17.2645	10.3986
	Δatg8+LGG1	100	88.1246	50.7355	22.042	10.9345			Δatg8+LGG1-GAG*	100	40.3266	5.26125	3.89695	4.07112
