# Supplementary material for: LGG-1/GABARAP lipidation is not required for autophagy and development in Caenorhabditis elegans
Source: eLife journal article supplement (doi:10.7554/elife.85748), 2023-07-03
Supplement: supp [file elife-85748-supp-v1.zip]

# CONTROLES *lgg-1(wt)* CO-LOCALISATION SEPA-1::GFP et LGG-2

\*\*\*\*\*

Image A: C1-221007\_LGG2\_SEPAGFP-HZ455-1.lif

Image B: C2-221007\_LGG2\_SEPAGFP-HZ455-1.lif

Pearson's Coefficient:

$r=0.497$

Overlap Coefficient:

$r=0.726$

$r^2=k_1 \times k_2$ :

$k_1=1.58$

$k_2=0.334$

Using thresholds (thrA=65 and thrB=114)

Overlap Coefficient:

$r=0.906$

$r^2=k_1 \times k_2$ :

$k_1=1.255$

$k_2=0.655$

Manders' Coefficients (original):

$M1=0.999$  (fraction of A overlapping B)

$M2=1.0$  (fraction of B overlapping A)

Manders' Coefficients (using threshold value of 65 for imgA and 114 for imgB):

$M1=0.153$  (fraction of A overlapping B)

$M2=0.172$  (fraction of B overlapping A)

Costes' automatic threshold set to 4 for imgA & 15 for imgB

Pearson's Coefficient:

$r=0.261$  (0.0 below thresholds)

$M1=0.879$  &  $M2=0.858$

\*\*\*\*\*

Image A: C1-221007\_LGG2\_SEPAGFP-HZ455-2.lif - Series001-1

Image B: C2-221007\_LGG2\_SEPAGFP-HZ455-2.lif - Series001-1

Pearson's Coefficient:

$r=0.36$

Overlap Coefficient:

$r=0.618$

$r^2=k_1 \times k_2$ :

$k_1=1.598$

$k_2=0.238$

\*\*\*\*\*

Image A: C1-221007\_LGG2\_SEPAGFP-HZ455-2.tif - Series002-1

Image B: C2-221007\_LGG2\_SEPAGFP-HZ455-2.tif - Series002-1

Pearson's Coefficient:

$r=0.405$

Overlap Coefficient:

$r=0.655$

$r^2=k_1k_2$ :

$k_1=0.998$

$k_2=0.43$

Using thresholds (thrA=108 and thrB=89)

Overlap Coefficient:

$r=0.943$

$r^2=k_1k_2$ :

$k_1=0.572$

$k_2=1.557$

Manders' Coefficients (original):

$M_1=0.999$  (fraction of A overlapping B)

$M_2=1.0$  (fraction of B overlapping A)

Manders' Coefficients (using threshold value of 108 for imgA and 89 for imgB):

$M_1=0.223$  (fraction of A overlapping B)

$M_2=0.176$  (fraction of B overlapping A)

Costes' automatic threshold set to 3 for imgA & 18 for imgB

Pearson's Coefficient:

$r=0.296$  (0.0 below thresholds)

$M_1=0.943$  &  $M_2=0.8$

Using thresholds (thrA=73 and thrB=121)

Overlap Coefficient:

$r=0.953$

$r^2=k_1k_2$ :

$k_1=0.587$

$k_2=1.548$

Manders' Coefficients (original):

$M_1=1.0$  (fraction of A overlapping B)

$M_2=0.999$  (fraction of B overlapping A)

Manders' Coefficients (using threshold value of 73 for imgA and 121 for imgB):

$M_1=0.034$  (fraction of A overlapping B)

M2=0.044 (fraction of B overlapping A)

Costes' automatic threshold set to 3 for imgA & 25 for imgB

Pearson's Coefficient:

r=0.064 (0.0 below thresholds)

M1=0.901 & M2=0.901

\*\*\*\*\*

Image A: C1-221007\_LGG2\_SEPAGFP-HZ455-2.lif - Series003-1

Image B: C2-221007\_LGG2\_SEPAGFP-HZ455-2.lif - Series003-1

Pearson's Coefficient:

r=0.446

Overlap Coefficient:

r=0.673

$r^2=k_1 \times k_2$ :

k1=1.701

k2=0.266

Using thresholds (thrA=71 and thrB=117)

Overlap Coefficient:

r=0.928

$r^2=k_1 \times k_2$ :

k1=0.75

k2=1.147

Manders' Coefficients (original):

M1=1.0 (fraction of A overlapping B)

M2=1.0 (fraction of B overlapping A)

Manders' Coefficients (using threshold value of 71 for imgA and 117 for imgB):

M1=0.285 (fraction of A overlapping B)

M2=0.142 (fraction of B overlapping A)

Costes' automatic threshold set to 3 for imgA & 25 for imgB

Pearson's Coefficient:

r=0.241 (0.0 below thresholds)

M1=0.919 & M2=0.911

\*\*\*\*\*

Image A: C1-221007\_LGG2\_SEPAGFP-HZ455-2.lif - Series004-1

Image B: C2-221007\_LGG2\_SEPAGFP-HZ455-2.lif - Series004-1

Pearson's Coefficient:

r=0.391

Overlap Coefficient:

r=0.6

$r^2 = k_1 \times k_2$ :  
 $k_1 = 1.112$   
 $k_2 = 0.324$

Using thresholds (thrA=83 and thrB=99)

Overlap Coefficient:  
 $r = 0.945$

$r^2 = k_1 \times k_2$ :  
 $k_1 = 0.589$   
 $k_2 = 1.515$

Manders' Coefficients (original):  
 $M_1 = 1.0$  (fraction of A overlapping B)  
 $M_2 = 1.0$  (fraction of B overlapping A)

Manders' Coefficients (using threshold value of 83 for imgA and 99 for imgB):  
 $M_1 = 0.244$  (fraction of A overlapping B)  
 $M_2 = 0.507$  (fraction of B overlapping A)

Costes' automatic threshold set to 4 for imgA & 22 for imgB  
Pearson's Coefficient:  
 $r = 0.324$  (0.0 below thresholds)  
 $M_1 = 0.871$  &  $M_2 = 0.843$

\*\*\*\*\*  
Image A: C1-221007\_LGG2\_SEPAGFP-HZ455-2.tif - Series005-1  
Image B: C2-221007\_LGG2\_SEPAGFP-HZ455-2.tif - Series005-1

Pearson's Coefficient:  
 $r = 0.455$

Overlap Coefficient:  
 $r = 0.693$

$r^2 = k_1 \times k_2$ :  
 $k_1 = 0.906$   
 $k_2 = 0.53$

Using thresholds (thrA=67 and thrB=58)

Overlap Coefficient:  
 $r = 0.888$

$r^2 = k_1 \times k_2$ :  
 $k_1 = 0.458$   
 $k_2 = 1.718$

Manders' Coefficients (original):  
M1=1.0 (fraction of A overlapping B)  
M2=1.0 (fraction of B overlapping A)

Manders' Coefficients (using threshold value of 67 for imgA and 58 for imgB):  
M1=0.127 (fraction of A overlapping B)  
M2=0.096 (fraction of B overlapping A)

Costes' automatic threshold set to 4 for imgA & 11 for imgB  
Pearson's Coefficient:  
r=0.239 (0.0 below thresholds)  
M1=0.885 & M2=0.851

\*\*\*\*\*  
Image A: C1-220919\_LGG2\_SEPA1GFP-N2001.lif - Series001-1  
Image B: C2-220919\_LGG2\_SEPA1GFP-N2001.lif - Series001-1

Pearson's Coefficient:  
r=0.457

Overlap Coefficient:  
r=0.637

$r^2=k_1 \times k_2$ :  
k1=1.366  
k2=0.297

Using thresholds (thrA=45 and thrB=76)

Overlap Coefficient:  
r=0.889

$r^2=k_1 \times k_2$ :  
k1=0.819  
k2=0.965

Manders' Coefficients (original):  
M1=1.0 (fraction of A overlapping B)  
M2=1.0 (fraction of B overlapping A)

Manders' Coefficients (using threshold value of 45 for imgA and 76 for imgB):  
M1=0.399 (fraction of A overlapping B)  
M2=0.391 (fraction of B overlapping A)

Costes' automatic threshold set to 4 for imgA & 15 for imgB  
Pearson's Coefficient:  
r=0.393 (0.0 below thresholds)  
M1=0.737 & M2=0.865

\*\*\*\*\*  
Image A: C1-220919\_LGG2\_SEPA1GFP-N2001.lif - Series002-1  
Image B: C2-220919\_LGG2\_SEPA1GFP-N2001.lif - Series002-1

Pearson's Coefficient:

$r=0.332$

Overlap Coefficient:

$r=0.623$

$r^2=k_1 \times k_2$ :

$k_1=3.044$

$k_2=0.127$

Using thresholds (thrA=56 and thrB=105)

Overlap Coefficient:

$r=0.89$

$r^2=k_1 \times k_2$ :

$k_1=1.211$

$k_2=0.655$

Manders' Coefficients (original):

$M_1=1.0$  (fraction of A overlapping B)

$M_2=1.0$  (fraction of B overlapping A)

Manders' Coefficients (using threshold value of 56 for imgA and 105 for imgB):

$M_1=0.408$  (fraction of A overlapping B)

$M_2=0.082$  (fraction of B overlapping A)

Costes' automatic threshold set to 4 for imgA & 27 for imgB

Pearson's Coefficient:

$r=0.218$  (0.0 below thresholds)

$M_1=0.661$  &  $M_2=0.819$

\*\*\*\*\*

Image A: C1-220919\_LGG2\_SEPA1GFP-N2001.lif - Series003-1

Image B: C2-220919\_LGG2\_SEPA1GFP-N2001.lif - Series003-1

Pearson's Coefficient:

$r=0.322$

Overlap Coefficient:

$r=0.628$

$r^2=k_1 \times k_2$ :

$k_1=1.821$

$k_2=0.217$

Using thresholds (thrA=36 and thrB=80)

Overlap Coefficient:

$r=0.861$

$r^2=k_1 \times k_2$ :

$k_1=0.651$

$k_2=1.138$

Manders' Coefficients (original):

$M_1=1.0$  (fraction of A overlapping B)

$M_2=1.0$  (fraction of B overlapping A)

Manders' Coefficients (using threshold value of 36 for imgA and 80 for imgB):

$M_1=0.312$  (fraction of A overlapping B)

$M_2=0.152$  (fraction of B overlapping A)

Costes' automatic threshold set to 4 for imgA & 18 for imgB

Pearson's Coefficient:

$r=0.237$  (0.0 below thresholds)

$M_1=0.704$  &  $M_2=0.8$

\*\*\*\*\*

Image A: C1-220919\_LGG2\_SEPA1GFP-N2001.lif - Series004-1

Image B: C2-220919\_LGG2\_SEPA1GFP-N2001.lif - Series004-1

Pearson's Coefficient:

$r=0.232$

Overlap Coefficient:

$r=0.573$

$r^2=k_1 \times k_2$ :

$k_1=3.579$

$k_2=0.091$

Using thresholds (thrA=54 and thrB=119)

Overlap Coefficient:

$r=0.919$

$r^2=k_1 \times k_2$ :

$k_1=0.664$

$k_2=1.273$

Manders' Coefficients (original):

$M_1=1.0$  (fraction of A overlapping B)

$M_2=1.0$  (fraction of B overlapping A)

Manders' Coefficients (using threshold value of 54 for imgA and 119 for imgB):

$M_1=0.205$  (fraction of A overlapping B)

$M_2=0.03$  (fraction of B overlapping A)

Costes' automatic threshold set to 255 for imgA & 255 for imgB

Pearson's Coefficient:

r=0.0 (0.0 below thresholds)

M1=0.0 & M2=0.0

\*\*\*\*\*

Image A: C1-220919\_LGG2\_SEPA1GFP-N2001.lif - Series005-1

Image B: C2-220919\_LGG2\_SEPA1GFP-N2001.lif - Series005-1

Pearson's Coefficient:

r=0.449

Overlap Coefficient:

r=0.661

$r^2=k_1 \times k_2$ :

k1=1.08

k2=0.405

Using thresholds (thrA=65 and thrB=78)

Overlap Coefficient:

r=0.871

$r^2=k_1 \times k_2$ :

k1=0.939

k2=0.807

Manders' Coefficients (original):

M1=1.0 (fraction of A overlapping B)

M2=1.0 (fraction of B overlapping A)

Manders' Coefficients (using threshold value of 65 for imgA and 78 for imgB):

M1=0.232 (fraction of A overlapping B)

M2=0.176 (fraction of B overlapping A)

Costes' automatic threshold set to 4 for imgA & 12 for imgB

Pearson's Coefficient:

r=0.309 (0.0 below thresholds)

M1=0.845 & M2=0.852

### **MUTANTS *lgg-1(ga)* CO-LOCALISATION SEPA-1::GFP et LGG-2**

\*\*\*\*\*

Image A: C1-220919\_LGG2\_SEPA1GFP-RD448001.lif - Series001-1

Image B: C2-220919\_LGG2\_SEPA1GFP-RD448001.lif - Series001-1

Pearson's Coefficient:

r=0.371

Overlap Coefficient:

r=0.531

$r^2=k_1 \times k_2$ :



k1=0.725  
k2=0.389

Using thresholds (thrA=53 and thrB=116)

Overlap Coefficient:  
r=0.865

$r^2=k_1 \times k_2$ :  
k1=0.98  
k2=0.764

Manders' Coefficients (original):  
M1=0.999 (fraction of A overlapping B)  
M2=1.0 (fraction of B overlapping A)

Manders' Coefficients (using threshold value of 53 for imgA and 116 for imgB):  
M1=0.071 (fraction of A overlapping B)  
M2=0.213 (fraction of B overlapping A)

Costes' automatic threshold set to 4 for imgA & 16 for imgB

Pearson's Coefficient:  
r=0.281 (0.0 below thresholds)  
M1=0.808 & M2=0.74

\*\*\*\*\*

Image A: C1-220919\_LGG2\_SEPA1GFP-RD448001.lif - Series002-1  
Image B: C2-220919\_LGG2\_SEPA1GFP-RD448001.lif - Series002-1

Pearson's Coefficient:  
r=0.377

Overlap Coefficient:  
r=0.516

$r^2=k_1 \times k_2$ :  
k1=1.521  
k2=0.175

Using thresholds (thrA=58 and thrB=162)

Overlap Coefficient:  
r=0.937

$r^2=k_1 \times k_2$ :  
k1=0.926  
k2=0.948

Manders' Coefficients (original):  
M1=0.999 (fraction of A overlapping B)  
M2=1.0 (fraction of B overlapping A)

Manders' Coefficients (using threshold value of 58 for imgA and 162 for imgB):

M1=0.328 (fraction of A overlapping B)

M2=0.246 (fraction of B overlapping A)

Costes' automatic threshold set to 3 for imgA & 39 for imgB

Pearson's Coefficient:

$r=0.313$  (0.0 below thresholds)

M1=0.867 & M2=0.82

\*\*\*\*\*

Image A: C1-220919\_LGG2\_SEPA1GFP-RD448001.lif - Series003-1

Image B: C2-220919\_LGG2\_SEPA1GFP-RD448001.lif - Series003-1

Pearson's Coefficient:

$r=0.249$

Overlap Coefficient:

$r=0.493$

$r^2=k_1 \times k_2$ :

$k_1=1.293$

$k_2=0.188$

Using thresholds (thrA=53 and thrB=112)

Overlap Coefficient:

$r=0.847$

$r^2=k_1 \times k_2$ :

$k_1=1.179$

$k_2=0.609$

Manders' Coefficients (original):

M1=0.999 (fraction of A overlapping B)

M2=1.0 (fraction of B overlapping A)

Manders' Coefficients (using threshold value of 53 for imgA and 112 for imgB):

M1=0.049 (fraction of A overlapping B)

M2=0.039 (fraction of B overlapping A)

Costes' automatic threshold set to 4 for imgA & 22 for imgB

Pearson's Coefficient:

$r=0.096$  (0.0 below thresholds)

M1=0.768 & M2=0.792

\*\*\*\*\*

Image A: C1-221007\_LGG2\_SEPAGFP-RD448.lif - Series002-1

Image B: C2-221007\_LGG2\_SEPAGFP-RD448.lif - Series002-1

Pearson's Coefficient:

$r=0.389$

Overlap Coefficient:  
 $r=0.516$

$r^2=k_1 \times k_2$ :  
 $k_1=0.834$   
 $k_2=0.319$

Using thresholds (thrA=65 and thrB=114)

Overlap Coefficient:  
 $r=0.932$

$r^2=k_1 \times k_2$ :  
 $k_1=0.651$   
 $k_2=1.334$

Manders' Coefficients (original):  
 $M1=0.999$  (fraction of A overlapping B)  
 $M2=1.0$  (fraction of B overlapping A)

Manders' Coefficients (using threshold value of 65 for imgA and 114 for imgB):  
 $M1=0.206$  (fraction of A overlapping B)  
 $M2=0.277$  (fraction of B overlapping A)

Costes' automatic threshold set to 3 for imgA & 20 for imgB  
Pearson's Coefficient:  
 $r=0.316$  (0.0 below thresholds)  
 $M1=0.85$  &  $M2=0.81$

\*\*\*\*\*

Image A: C1-221007\_LGG2\_SEPAGFP-RD448.lif - Series003-1  
Image B: C2-221007\_LGG2\_SEPAGFP-RD448.lif - Series003-1

Pearson's Coefficient:  
 $r=0.322$

Overlap Coefficient:  
 $r=0.472$

$r^2=k_1 \times k_2$ :  
 $k_1=0.91$   
 $k_2=0.245$

Using thresholds (thrA=49 and thrB=117)

Overlap Coefficient:  
 $r=0.914$

$r^2=k_1 \times k_2$ :  
 $k_1=0.649$   
 $k_2=1.286$

Manders' Coefficients (original):

M1=1.0 (fraction of A overlapping B)

M2=1.0 (fraction of B overlapping A)

Manders' Coefficients (using threshold value of 49 for imgA and 117 for imgB):

M1=0.138 (fraction of A overlapping B)

M2=0.147 (fraction of B overlapping A)

Costes' automatic threshold set to 3 for imgA & 23 for imgB

Pearson's Coefficient:

r=0.214 (0.0 below thresholds)

M1=0.835 & M2=0.784

\*\*\*\*\*

Image A: C1-221007\_LGG2\_SEPAGFP-RD448.lif - Series005-1

Image B: C2-221007\_LGG2\_SEPAGFP-RD448.lif - Series005-1

Pearson's Coefficient:

r=0.276

Overlap Coefficient:

r=0.447

$r^2=k_1 \times k_2$ :

k1=1.003

k2=0.199

Using thresholds (thrA=67 and thrB=132)

Overlap Coefficient:

r=0.95

$r^2=k_1 \times k_2$ :

k1=0.671

k2=1.344

Manders' Coefficients (original):

M1=0.999 (fraction of A overlapping B)

M2=1.0 (fraction of B overlapping A)

Manders' Coefficients (using threshold value of 67 for imgA and 132 for imgB):

M1=0.122 (fraction of A overlapping B)

M2=0.144 (fraction of B overlapping A)

Costes' automatic threshold set to 3 for imgA & 40 for imgB

Pearson's Coefficient:

r=0.182 (0.0 below thresholds)

M1=0.892 & M2=0.83

\*\*\*\*\*

Image A: C1-221007\_LGG2\_SEPAGFP-RD448.lif - Series006

Image B: C2-221007\_LGG2\_SEPAGFP-RD448.lif - Series006

Pearson's Coefficient:

$r=0.276$

Overlap Coefficient:

$r=0.418$

$r^2=k_1 \times k_2$ :

$k_1=1.01$

$k_2=0.173$

Using thresholds (thrA=46 and thrB=118)

Overlap Coefficient:

$r=0.895$

$r^2=k_1 \times k_2$ :

$k_1=0.667$

$k_2=1.201$

Manders' Coefficients (original):

$M1=0.999$  (fraction of A overlapping B)

$M2=1.0$  (fraction of B overlapping A)

Manders' Coefficients (using threshold value of 46 for imgA and 118 for imgB):

$M1=0.082$  (fraction of A overlapping B)

$M2=0.083$  (fraction of B overlapping A)

Costes' automatic threshold set to 4 for imgA & 14 for imgB

Pearson's Coefficient:

$r=0.185$  (0.0 below thresholds)

$M1=0.456$  &  $M2=0.796$

\*\*\*\*\*

Image A: C1-221007\_LGG2\_SEPAGFP-RD448.lif - Series007-1

Image B: C2-221007\_LGG2\_SEPAGFP-RD448.lif - Series007-1

Pearson's Coefficient:

$r=0.259$

Overlap Coefficient:

$r=0.458$

$r^2=k_1 \times k_2$ :

$k_1=0.665$

$k_2=0.315$

Using thresholds (thrA=49 and thrB=116)

Overlap Coefficient:

$r=0.832$

$r^2=k_1k_2$ :  
k1=0.781  
k2=0.886

Manders' Coefficients (original):  
M1=0.999 (fraction of A overlapping B)  
M2=1.0 (fraction of B overlapping A)

Manders' Coefficients (using threshold value of 49 for imgA and 116 for imgB):  
M1=0.02 (fraction of A overlapping B)  
M2=0.074 (fraction of B overlapping A)

Costes' automatic threshold set to 3 for imgA & 18 for imgB  
Pearson's Coefficient:  
r=0.184 (0.0 below thresholds)  
M1=0.855 & M2=0.741

\*\*\*\*\*

Image A: C1-221007\_LGG2\_SEPAGFP-RD448.lif - Series008-1  
Image B: C2-221007\_LGG2\_SEPAGFP-RD448.lif - Series008-1

Pearson's Coefficient:  
r=0.22

Overlap Coefficient:  
r=0.414

$r^2=k_1k_2$ :  
k1=1.119  
k2=0.153

Using thresholds (thrA=55 and thrB=116)

Overlap Coefficient:  
r=0.942

$r^2=k_1k_2$ :  
k1=0.577  
k2=1.538

Manders' Coefficients (original):  
M1=0.999 (fraction of A overlapping B)  
M2=1.0 (fraction of B overlapping A)

Manders' Coefficients (using threshold value of 55 for imgA and 116 for imgB):  
M1=0.079 (fraction of A overlapping B)  
M2=0.09 (fraction of B overlapping A)

Costes' automatic threshold set to 3 for imgA & 29 for imgB  
Pearson's Coefficient:  
r=0.15 (0.0 below thresholds)

M1=0.754 & M2=0.796

\*\*\*\*\*

Image A: C1-221007\_LGG2\_SEPAGFP-RD448.lif - Series009-1

Image B: C2-221007\_LGG2\_SEPAGFP-RD448.lif - Series009-1

Pearson's Coefficient:

r=0.369

Overlap Coefficient:

r=0.524

$r^2=k_1 \times k_2$ :

k1=0.763

k2=0.36

Using thresholds (thrA=65 and thrB=119)

Overlap Coefficient:

r=0.907

$r^2=k_1 \times k_2$ :

k1=0.714

k2=1.151

Manders' Coefficients (original):

M1=1.0 (fraction of A overlapping B)

M2=1.0 (fraction of B overlapping A)

Manders' Coefficients (using threshold value of 65 for imgA and 119 for imgB):

M1=0.132 (fraction of A overlapping B)

M2=0.268 (fraction of B overlapping A)

Costes' automatic threshold set to 3 for imgA & 24 for imgB

Pearson's Coefficient:

r=0.293 (0.0 below thresholds)

M1=0.916 & M2=0.798

\*\*\*\*\*

Image A: C1-221007\_LGG2\_SEPAGFP-RD448.lif - Series010-1

Image B: C2-221007\_LGG2\_SEPAGFP-RD448.lif - Series010-1

Pearson's Coefficient:

r=0.299

Overlap Coefficient:

r=0.541

$r^2=k_1 \times k_2$ :

k1=1.585

k2=0.184

Using thresholds (thrA=49 and thrB=118)

Overlap Coefficient:

$r=0.849$

$r^2=k_1 \times k_2$ :

$k_1=1.286$

$k_2=0.56$

Manders' Coefficients (original):

$M_1=0.999$  (fraction of A overlapping B)

$M_2=1.0$  (fraction of B overlapping A)

Manders' Coefficients (using threshold value of 49 for imgA and 118 for imgB):

$M_1=0.098$  (fraction of A overlapping B)

$M_2=0.082$  (fraction of B overlapping A)

Costes' automatic threshold set to 4 for imgA & 24 for imgB

Pearson's Coefficient:

$r=0.162$  (0.0 below thresholds)

$M_1=0.746$  &  $M_2=0.757$

\*\*\*\*\*

Image A: C1-221007\_LGG2\_SEPAGFP-RD448.lif - Series011-1

Image B: C2-221007\_LGG2\_SEPAGFP-RD448.lif - Series011-1

Pearson's Coefficient:

$r=0.262$

Overlap Coefficient:

$r=0.446$

$r^2=k_1 \times k_2$ :

$k_1=0.699$

$k_2=0.284$

Using thresholds (thrA=53 and thrB=114)

Overlap Coefficient:

$r=0.963$

$r^2=k_1 \times k_2$ :

$k_1=0.54$

$k_2=1.717$

Manders' Coefficients (original):

$M_1=1.0$  (fraction of A overlapping B)

$M_2=1.0$  (fraction of B overlapping A)

Manders' Coefficients (using threshold value of 53 for imgA and 114 for imgB):

$M_1=0.035$  (fraction of A overlapping B)

$M_2=0.143$  (fraction of B overlapping A)



Costes' automatic threshold set to 3 for imgA & 16 for imgB

Pearson's Coefficient:

$r=0.249$  (0.0 below thresholds)

$M1=0.767$  &  $M2=0.745$

\*\*\*\*\*

Image A: C1-221007\_LGG2\_SEPAGFP-RD448.lif - Series012-1

Image B: C2-221007\_LGG2\_SEPAGFP-RD448.lif - Series012-1

Pearson's Coefficient:

$r=0.388$

Overlap Coefficient:

$r=0.509$

$r^2=k1 \times k2$ :

$k1=0.671$

$k2=0.386$

Using thresholds (thrA=60 and thrB=117)

Overlap Coefficient:

$r=0.974$

$r^2=k1 \times k2$ :

$k1=0.561$

$k2=1.694$

Manders' Coefficients (original):

$M1=1.0$  (fraction of A overlapping B)

$M2=1.0$  (fraction of B overlapping A)

Manders' Coefficients (using threshold value of 60 for imgA and 117 for imgB):

$M1=0.09$  (fraction of A overlapping B)

$M2=0.427$  (fraction of B overlapping A)

Costes' automatic threshold set to 3 for imgA & 20 for imgB

Pearson's Coefficient:

$r=0.365$  (0.0 below thresholds)

$M1=0.866$  &  $M2=0.813$
