# Supplementary material for: LGG-1/GABARAP lipidation is not required for autophagy and development in Caenorhabditis elegans
Source: eLife journal article supplement (doi:10.7554/elife.85748), 2023-07-03
Supplement: supp [file elife-85748-supp-v1.zip]

| Table Analyzed                                                                                                                                                                                         | Copy of number of punctiform structures                                               | Table Analyzed                                                                                                                                                                                         | Copy of number of punctiform structures                                           | Table Analyzed                                                                                                                                                                                         | Copy of number of punctiform structures                                            | Table Analyzed                                                                                                                                                                                         | Copy of number of punctiform structures                                                     |
|--------------------------------------------------------------------------------------------------------------------------------------------------------------------------------------------------------|---------------------------------------------------------------------------------------|--------------------------------------------------------------------------------------------------------------------------------------------------------------------------------------------------------|-----------------------------------------------------------------------------------|--------------------------------------------------------------------------------------------------------------------------------------------------------------------------------------------------------|------------------------------------------------------------------------------------|--------------------------------------------------------------------------------------------------------------------------------------------------------------------------------------------------------|---------------------------------------------------------------------------------------------|
| Column B<br>vs.<br>Column A                                                                                                                                                                            | <i>lgg-1(tm3489)</i><br>vs,<br>ctrl                                                   | Column C<br>vs.<br>Column A                                                                                                                                                                            | <i>lgg-1(G116A)</i><br>vs,<br>ctrl                                                | Column D<br>vs.<br>Column A                                                                                                                                                                            | <i>lgg-1(G116AG117*)</i><br>vs,<br>ctrl                                            | Column E<br>vs.<br>Column A                                                                                                                                                                            | <i>RNAi unc-51</i><br>vs,<br>ctrl                                                           |
| Mann Whitney test<br>P value<br>Exact or approximate P value?<br>P value summary<br>Significantly different (P < 0.05)?<br>One- or two-tailed P value?<br>Sum of ranks in column A,B<br>Mann-Whitney U | <br><0,0001<br><br>Exact<br>****<br><br>Yes<br><br>Two-tailed<br><br>99 , 604<br>8    | Mann Whitney test<br>P value<br>Exact or approximate P value?<br>P value summary<br>Significantly different (P < 0.05)?<br>One- or two-tailed P value?<br>Sum of ranks in column A,C<br>Mann-Whitney U | <br>0,0060<br><br>Exact<br>**<br><br>Yes<br><br>Two-tailed<br><br>199 , 77<br>22  | Mann Whitney test<br>P value<br>Exact or approximate P value?<br>P value summary<br>Significantly different (P < 0.05)?<br>One- or two-tailed P value?<br>Sum of ranks in column A,D<br>Mann-Whitney U | <br><0,0001<br><br>Exact<br>****<br><br>Yes<br><br>Two-tailed<br><br>91 , 287<br>0 | Mann Whitney test<br>P value<br>Exact or approximate P value?<br>P value summary<br>Significantly different (P < 0.05)?<br>One- or two-tailed P value?<br>Sum of ranks in column A,E<br>Mann-Whitney U | <br><0,0001<br><br>Exact<br>****<br><br>Yes<br><br>Two-tailed<br><br>420,5 , 440,5<br>34,50 |
| Table Analyzed                                                                                                                                                                                         | Copy of number of punctiform structures                                               | Table Analyzed                                                                                                                                                                                         | Copy of number of punctiform structures                                           | Table Analyzed                                                                                                                                                                                         | Copy of number of punctiform structures                                            | Table Analyzed                                                                                                                                                                                         | Copy of number of punctiform structures                                                     |
| Column F<br>vs.<br>Column B                                                                                                                                                                            | <i>lgg-1(tm3489) RNAi unc-51</i><br>vs,<br><i>lgg-1(tm3489)</i>                       | Column H<br>vs.<br>Column D                                                                                                                                                                            | <i>lgg-1(G116AG117*) RNAi unc-51</i><br>vs,<br><i>lgg-1(G116AG117*)</i>           | Column G<br>vs.<br>Column C                                                                                                                                                                            | <i>lgg-1(G116A) RNAi unc-51</i><br>vs,<br><i>lgg-1(G116A)</i>                      | Column F<br>vs.<br>Column E                                                                                                                                                                            | <i>lgg-1(tm3489) RNAi unc-51</i><br>vs,<br><i>RNAi unc-51</i>                               |
| Mann Whitney test<br>P value<br>Exact or approximate P value?<br>P value summary<br>Significantly different (P < 0.05)?<br>One- or two-tailed P value?<br>Sum of ranks in column B,F<br>Mann-Whitney U | <br><0,0001<br><br>Exact<br>****<br><br>Yes<br><br>Two-tailed<br><br>1112 , 718<br>52 | Mann Whitney test<br>P value<br>Exact or approximate P value?<br>P value summary<br>Significantly different (P < 0.05)?<br>One- or two-tailed P value?<br>Sum of ranks in column D,H<br>Mann-Whitney U | <br>0,7623<br><br>Exact<br>ns<br><br>No<br><br>Two-tailed<br><br>236 , 359<br>131 | Unpaired t test<br>P value<br>P value summary<br>Significantly different (P < 0.05)?<br>One- or two-tailed P value?<br>t, df                                                                           | <br>0,0011<br>**<br><br>Yes<br><br>Two-tailed<br>t=3,571, df=35                    | Mann Whitney test<br>P value<br>Exact or approximate P value?<br>P value summary<br>Significantly different (P < 0.05)?<br>One- or two-tailed P value?<br>Sum of ranks in column E,F<br>Mann-Whitney U | <br>0,1939<br><br>Exact<br>ns<br><br>No<br><br>Two-tailed<br><br>1007 , 1074<br>407,5       |

Table Analyzed

Copy of number of punctiform structures

Column G

vs.

Column E

*lgg-1(G116A) RNAi unc-51*

Mann Whitney test

P value

Exact or approximate P value?

P value summary

Significantly different (P < 0.05)?

One- or two-tailed P value?

Sum of ranks in column E,G

Mann-Whitney U

0,1722

Exact

ns

No

Two-tailed

865,5 , 674,5

296,5

Table Analyzed

Copy of number of punctiform structures

Column H

vs.

Column E

*lgg-1(G116AG117\*) RNAi unc-51*

Mann Whitney test

P value

Exact or approximate P value?

P value summary

Significantly different (P < 0.05)?

One- or two-tailed P value?

Sum of ranks in column E,H

Mann-Whitney U

<0,0001

Exact

\*\*\*\*

Yes

Two-tailed

434 , 742

28

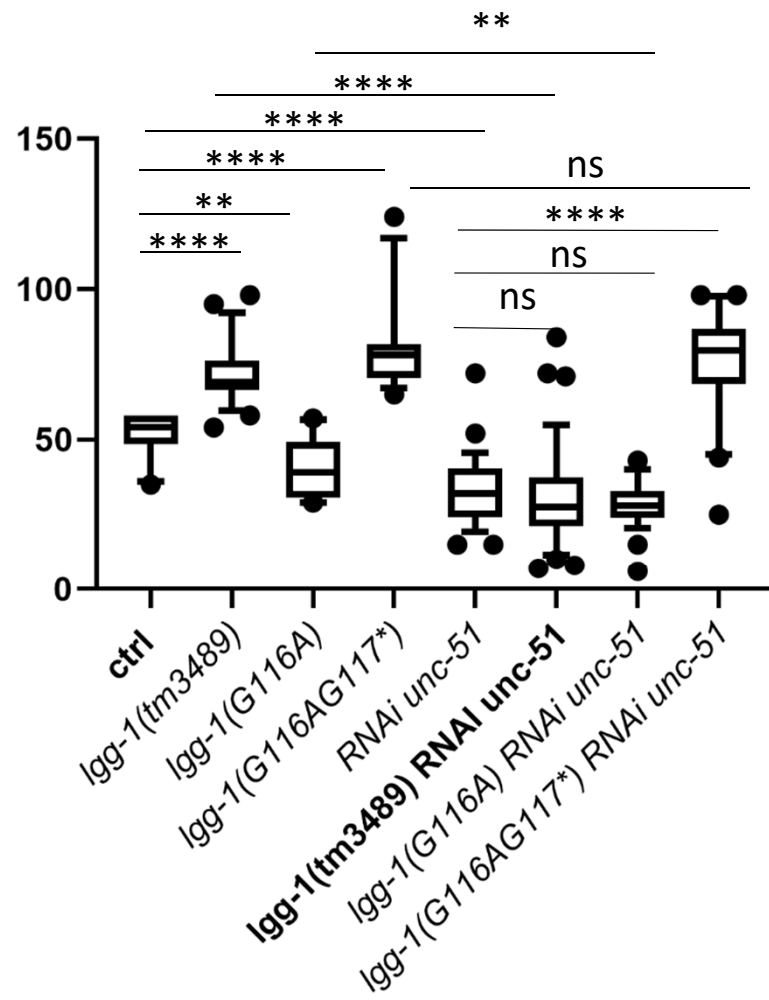

Mann Whitney  
Alpha 0,05

number of punctiform structures

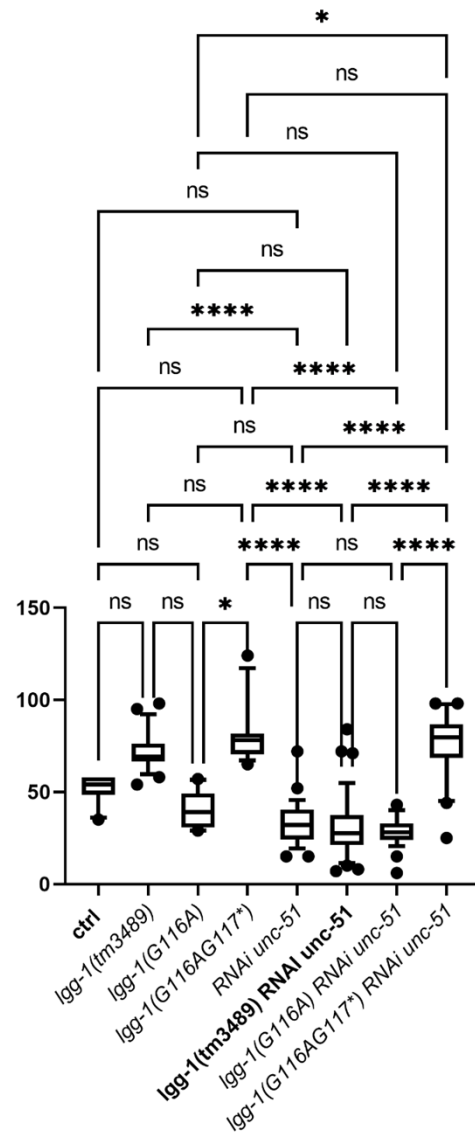

Kruskall Wallis  
Alpha 0,05

|                                  |      |
|----------------------------------|------|
| Number of families               | 1    |
| Number of comparisons per family | 28   |
| Alpha                            | 0,05 |

| Dunn's multiple comparisons test                                          | Mean rank diff. | Significant? | Summary | Adjusted P Value |     |
|---------------------------------------------------------------------------|-----------------|--------------|---------|------------------|-----|
| ctrl vs. <i>lgg-1(tm3489)</i>                                             | -32,01          | No           | ns      | >0,9999          | A-B |
| ctrl vs. <i>lgg-1(G116A)</i>                                              | 25,20           | No           | ns      | >0,9999          | A-C |
| ctrl vs. <i>lgg-1(G116AG117*)</i>                                         | -44,69          | No           | ns      | 0,5537           | A-D |
| ctrl vs. <i>RNAi unc-51</i>                                               | 43,15           | No           | ns      | 0,2747           | A-E |
| ctrl vs. <i>lgg-1(tm3489) RNAi unc-51</i>                                 | 51,97           | Yes          | *       | 0,0351           | A-F |
| ctrl vs. <i>lgg-1(G116A) RNAi unc-51</i>                                  | 55,14           | Yes          | *       | 0,0290           | A-G |
| ctrl vs. <i>lgg-1(G116AG117*) RNAi unc-51</i>                             | -39,33          | No           | ns      | 0,7447           | A-H |
| <i>lgg-1(tm3489)</i> vs. <i>lgg-1(G116A)</i>                              | 57,20           | No           | ns      | 0,0635           | B-C |
| <i>lgg-1(tm3489)</i> vs. <i>lgg-1(G116AG117*)</i>                         | -12,68          | No           | ns      | >0,9999          | B-D |
| <i>lgg-1(tm3489)</i> vs. <i>RNAi unc-51</i>                               | 75,16           | Yes          | ****    | <0,0001          | B-E |
| <i>lgg-1(tm3489)</i> vs. <i>lgg-1(tm3489) RNAi unc-51</i>                 | 83,98           | Yes          | ****    | <0,0001          | B-F |
| <i>lgg-1(tm3489)</i> vs. <i>lgg-1(G116A) RNAi unc-51</i>                  | 87,15           | Yes          | ****    | <0,0001          | B-G |
| <i>lgg-1(tm3489)</i> vs. <i>lgg-1(G116AG117*) RNAi unc-51</i>             | -7,321          | No           | ns      | >0,9999          | B-H |
| <i>lgg-1(G116A)</i> vs. <i>lgg-1(G116AG117*)</i>                          | -69,89          | Yes          | *       | 0,0195           | C-D |
| <i>lgg-1(G116A)</i> vs. <i>RNAi unc-51</i>                                | 17,95           | No           | ns      | >0,9999          | C-E |
| <i>lgg-1(G116A)</i> vs. <i>lgg-1(tm3489) RNAi unc-51</i>                  | 26,78           | No           | ns      | >0,9999          | C-F |
| <i>lgg-1(G116A)</i> vs. <i>lgg-1(G116A) RNAi unc-51</i>                   | 29,95           | No           | ns      | >0,9999          | C-G |
| <i>lgg-1(G116A)</i> vs. <i>lgg-1(G116AG117*) RNAi unc-51</i>              | -64,53          | Yes          | *       | 0,0229           | C-H |
| <i>lgg-1(G116AG117*)</i> vs. <i>RNAi unc-51</i>                           | 87,84           | Yes          | ****    | <0,0001          | D-E |
| <i>lgg-1(G116AG117*)</i> vs. <i>lgg-1(tm3489) RNAi unc-51</i>             | 96,66           | Yes          | ****    | <0,0001          | D-F |
| <i>lgg-1(G116AG117*)</i> vs. <i>lgg-1(G116A) RNAi unc-51</i>              | 99,83           | Yes          | ****    | <0,0001          | D-G |
| <i>lgg-1(G116AG117*)</i> vs. <i>lgg-1(G116AG117*) RNAi unc-51</i>         | 5,361           | No           | ns      | >0,9999          | D-H |
| <i>RNAi unc-51</i> vs. <i>lgg-1(tm3489) RNAi unc-51</i>                   | 8,821           | No           | ns      | >0,9999          | E-F |
| <i>RNAi unc-51</i> vs. <i>lgg-1(G116A) RNAi unc-51</i>                    | 11,99           | No           | ns      | >0,9999          | E-G |
| <i>RNAi unc-51</i> vs. <i>lgg-1(G116AG117*) RNAi unc-51</i>               | -82,48          | Yes          | ****    | <0,0001          | E-H |
| <i>lgg-1(tm3489) RNAi unc-51</i> vs. <i>lgg-1(G116A) RNAi unc-51</i>      | 3,171           | No           | ns      | >0,9999          | F-G |
| <i>lgg-1(tm3489) RNAi unc-51</i> vs. <i>lgg-1(G116AG117*) RNAi unc-51</i> | -91,30          | Yes          | ****    | <0,0001          | F-H |
| <i>lgg-1(G116A) RNAi unc-51</i> vs. <i>lgg-1(G116AG117*) RNAi unc-51</i>  | -94,47          | Yes          | ****    | <0,0001          | G-H |

| Test details                                                              | Mean rank 1 | Mean rank 2 | Mean rank diff. | n1 | n2 | Z      |
|---------------------------------------------------------------------------|-------------|-------------|-----------------|----|----|--------|
| ctrl vs. <i>lgg-1(tm3489)</i>                                             | 101,8       | 133,9       | -32,01          | 13 | 24 | 1,867  |
| ctrl vs. <i>lgg-1(G116A)</i>                                              | 101,8       | 76,65       | 25,20           | 13 | 10 | 1,203  |
| ctrl vs. <i>lgg-1(G116AG117*)</i>                                         | 101,8       | 146,5       | -44,69          | 13 | 14 | 2,331  |
| ctrl vs. <i>RNAi unc-51</i>                                               | 101,8       | 58,70       | 43,15           | 13 | 28 | 2,582  |
| ctrl vs. <i>lgg-1(tm3489) RNAi unc-51</i>                                 | 101,8       | 49,88       | 51,97           | 13 | 36 | 3,226  |
| ctrl vs. <i>lgg-1(G116A) RNAi unc-51</i>                                  | 101,8       | 46,70       | 55,14           | 13 | 27 | 3,281  |
| ctrl vs. <i>lgg-1(G116AG117*) RNAi unc-51</i>                             | 101,8       | 141,2       | -39,33          | 13 | 20 | 2,217  |
| <i>lgg-1(tm3489)</i> vs. <i>lgg-1(G116A)</i>                              | 133,9       | 76,65       | 57,20           | 24 | 10 | 3,053  |
| <i>lgg-1(tm3489)</i> vs. <i>lgg-1(G116AG117*)</i>                         | 133,9       | 146,5       | -12,68          | 24 | 14 | 0,7574 |
| <i>lgg-1(tm3489)</i> vs. <i>RNAi unc-51</i>                               | 133,9       | 58,70       | 75,16           | 24 | 28 | 5,427  |
| <i>lgg-1(tm3489)</i> vs. <i>lgg-1(tm3489) RNAi unc-51</i>                 | 133,9       | 49,88       | 83,98           | 24 | 36 | 6,401  |
| <i>lgg-1(tm3489)</i> vs. <i>lgg-1(G116A) RNAi unc-51</i>                  | 133,9       | 46,70       | 87,15           | 24 | 27 | 6,240  |
| <i>lgg-1(tm3489)</i> vs. <i>lgg-1(G116AG117*) RNAi unc-51</i>             | 133,9       | 141,2       | -7,321          | 24 | 20 | 0,4857 |
| <i>lgg-1(G116A)</i> vs. <i>lgg-1(G116AG117*)</i>                          | 76,65       | 146,5       | -69,89          | 10 | 14 | 3,390  |
| <i>lgg-1(G116A)</i> vs. <i>RNAi unc-51</i>                                | 76,65       | 58,70       | 17,95           | 10 | 28 | 0,9789 |
| <i>lgg-1(G116A)</i> vs. <i>lgg-1(tm3489) RNAi unc-51</i>                  | 76,65       | 49,88       | 26,78           | 10 | 36 | 1,505  |
| <i>lgg-1(G116A)</i> vs. <i>lgg-1(G116A) RNAi unc-51</i>                   | 76,65       | 46,70       | 29,95           | 10 | 27 | 1,625  |
| <i>lgg-1(G116A)</i> vs. <i>lgg-1(G116AG117*) RNAi unc-51</i>              | 76,65       | 141,2       | -64,53          | 10 | 20 | 3,346  |
| <i>lgg-1(G116AG117*)</i> vs. <i>RNAi unc-51</i>                           | 146,5       | 58,70       | 87,84           | 14 | 28 | 5,390  |
| <i>lgg-1(G116AG117*)</i> vs. <i>lgg-1(tm3489) RNAi unc-51</i>             | 146,5       | 49,88       | 96,66           | 14 | 36 | 6,164  |
| <i>lgg-1(G116AG117*)</i> vs. <i>lgg-1(G116A) RNAi unc-51</i>              | 146,5       | 46,70       | 99,83           | 14 | 27 | 6,089  |
| <i>lgg-1(G116AG117*)</i> vs. <i>lgg-1(G116AG117*) RNAi unc-51</i>         | 146,5       | 141,2       | 5,361           | 14 | 20 | 0,3090 |
| <i>RNAi unc-51</i> vs. <i>lgg-1(tm3489) RNAi unc-51</i>                   | 58,70       | 49,88       | 8,821           | 28 | 36 | 0,7032 |
| <i>RNAi unc-51</i> vs. <i>lgg-1(G116A) RNAi unc-51</i>                    | 58,70       | 46,70       | 11,99           | 28 | 27 | 0,8931 |
| <i>RNAi unc-51</i> vs. <i>lgg-1(G116AG117*) RNAi unc-51</i>               | 58,70       | 141,2       | -82,48          | 28 | 20 | 5,659  |
| <i>lgg-1(tm3489) RNAi unc-51</i> vs. <i>lgg-1(G116A) RNAi unc-51</i>      | 49,88       | 46,70       | 3,171           | 36 | 27 | 0,2502 |
| <i>lgg-1(tm3489) RNAi unc-51</i> vs. <i>lgg-1(G116AG117*) RNAi unc-51</i> | 49,88       | 141,2       | -91,30          | 36 | 20 | 6,576  |
| <i>lgg-1(G116A) RNAi unc-51</i> vs. <i>lgg-1(G116AG117*) RNAi unc-51</i>  | 46,70       | 141,2       | -94,47          | 27 | 20 | 6,432  |

# Atg18GFP replacement RNAI lgg-1 par Tm

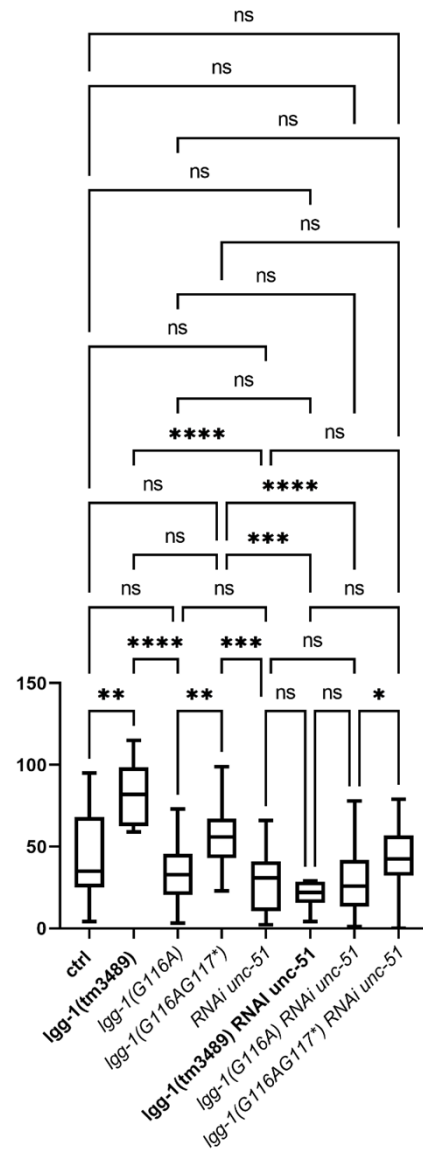

Kruskal Wallis  
Alpha 0,05

|                                                             |                 |              |                 |                  |     |        |
|-------------------------------------------------------------|-----------------|--------------|-----------------|------------------|-----|--------|
| Number of families                                          | 1               |              |                 |                  |     |        |
| Number of comparisons per family                            | 28              |              |                 |                  |     |        |
| Alpha                                                       | 0,05            |              |                 |                  |     |        |
| Dunn's multiple comparisons test                            | Mean rank diff. | Significant? | Summary         | Adjusted P Value |     |        |
| ctrl vs. lgg-1(tm3489)                                      | -76.69          | Yes          | **              | 0,0028           | A-B |        |
| ctrl vs. lgg-1(G116A)                                       | 21.55           | No           | ns              | >0,9999          | A-C |        |
| ctrl vs. lgg-1(G116AG117*)                                  | -37.98          | No           | ns              | 0,4517           | A-D |        |
| ctrl vs. RNAi unc-51                                        | 33.43           | No           | ns              | 0,8686           | A-E |        |
| ctrl vs. lgg-1(tm3489) RNAi unc-51                          | 60.80           | No           | ns              | 0,1943           | A-F |        |
| ctrl vs. lgg-1(G116A) RNAi unc-51                           | 39.70           | No           | ns              | 0,1966           | A-G |        |
| ctrl vs. lgg-1(G116AG117*) RNAi unc-51                      | -9.650          | No           | ns              | >0,9999          | A-H |        |
| lgg-1(tm3489) vs. lgg-1(G116A)                              | 98.25           | Yes          | ****            | <0,0001          | B-C |        |
| lgg-1(tm3489) vs. lgg-1(G116AG117*)                         | 38.72           | No           | ns              | >0,9999          | B-D |        |
| lgg-1(tm3489) vs. RNAi unc-51                               | 110.1           | Yes          | ****            | <0,0001          | B-E |        |
| lgg-1(tm3489) vs. lgg-1(tm3489) RNAi unc-51                 | 137.5           | Yes          | ****            | <0,0001          | B-F |        |
| lgg-1(tm3489) vs. lgg-1(G116A) RNAi unc-51                  | 116.4           | Yes          | ****            | <0,0001          | B-G |        |
| lgg-1(tm3489) vs. lgg-1(G116AG117*) RNAi unc-51             | 67.05           | Yes          | *               | 0,0200           | B-H |        |
| lgg-1(G116A) vs. lgg-1(G116AG117*)                          | -59.53          | Yes          | **              | 0,0028           | C-D |        |
| lgg-1(G116A) vs. RNAi unc-51                                | 11.88           | No           | ns              | >0,9999          | C-E |        |
| lgg-1(G116A) vs. lgg-1(tm3489) RNAi unc-51                  | 39.25           | No           | ns              | >0,9999          | C-F |        |
| lgg-1(G116A) vs. lgg-1(G116A) RNAi unc-51                   | 18.15           | No           | ns              | >0,9999          | C-G |        |
| lgg-1(G116A) vs. lgg-1(G116AG117*) RNAi unc-51              | -31.20          | No           | ns              | >0,9999          | C-H |        |
| lgg-1(G116AG117*) vs. RNAi unc-51                           | 71.41           | Yes          | ***             | 0,0002           | D-E |        |
| lgg-1(G116AG117*) vs. lgg-1(tm3489) RNAi unc-51             | 98.78           | Yes          | ***             | 0,0004           | D-F |        |
| lgg-1(G116AG117*) vs. lgg-1(G116A) RNAi unc-51              | 77.68           | Yes          | ****            | <0,0001          | D-G |        |
| lgg-1(G116AG117*) vs. lgg-1(G116AG117*) RNAi unc-51         | 28.33           | No           | ns              | >0,9999          | D-H |        |
| RNAi unc-51 vs. lgg-1(tm3489) RNAi unc-51                   | 27.37           | No           | ns              | >0,9999          | E-F |        |
| RNAi unc-51 vs. lgg-1(G116A) RNAi unc-51                    | 6.273           | No           | ns              | >0,9999          | E-G |        |
| RNAi unc-51 vs. lgg-1(G116AG117*) RNAi unc-51               | -43.08          | No           | ns              | 0,1644           | E-H |        |
| lgg-1(tm3489) RNAi unc-51 vs. lgg-1(G116A) RNAi unc-51      | -21.10          | No           | ns              | >0,9999          | F-G |        |
| lgg-1(tm3489) RNAi unc-51 vs. lgg-1(G116AG117*) RNAi unc-51 | -70.45          | No           | ns              | 0,0515           | F-H |        |
| lgg-1(G116A) RNAi unc-51 vs. lgg-1(G116AG117*) RNAi unc-51  | -49.35          | Yes          | *               | 0,0253           | G-H |        |
| Test details                                                | Mean rank 1     | Mean rank 2  | Mean rank diff. | n1               | n2  | Z      |
| ctrl vs. lgg-1(tm3489)                                      | 109.2           | 185.9        | -76.69          | 29               | 13  | 3,893  |
| ctrl vs. lgg-1(G116A)                                       | 109.2           | 87.64        | 21.55           | 29               | 33  | 1,435  |
| ctrl vs. lgg-1(G116AG117*)                                  | 109.2           | 147.2        | -37.98          | 29               | 27  | 2,406  |
| ctrl vs. RNAi unc-51                                        | 109.2           | 75.76        | 33.43           | 29               | 29  | 2,157  |
| ctrl vs. lgg-1(tm3489) RNAi unc-51                          | 109.2           | 48.39        | 60.80           | 29               | 9   | 2,700  |
| ctrl vs. lgg-1(G116A) RNAi unc-51                           | 109.2           | 69.49        | 39.70           | 29               | 36  | 2,696  |
| ctrl vs. lgg-1(G116AG117*) RNAi unc-51                      | 109.2           | 118.8        | -9.650          | 29               | 28  | 0,6171 |
| lgg-1(tm3489) vs. lgg-1(G116A)                              | 185.9           | 87.64        | 98.25           | 13               | 33  | 5,083  |
| lgg-1(tm3489) vs. lgg-1(G116AG117*)                         | 185.9           | 147.2        | 38.72           | 13               | 27  | 1,943  |
| lgg-1(tm3489) vs. RNAi unc-51                               | 185.9           | 75.76        | 110.1           | 13               | 29  | 5,590  |
| lgg-1(tm3489) vs. lgg-1(tm3489) RNAi unc-51                 | 185.9           | 48.39        | 137.5           | 13               | 9   | 5,372  |
| lgg-1(tm3489) vs. lgg-1(G116A) RNAi unc-51                  | 185.9           | 69.49        | 116.4           | 13               | 36  | 6,095  |
| lgg-1(tm3489) vs. lgg-1(G116AG117*) RNAi unc-51             | 185.9           | 118.8        | 67.05           | 13               | 28  | 3,385  |
| lgg-1(G116A) vs. lgg-1(G116AG117*)                          | 87.64           | 147.2        | -59.53          | 33               | 27  | 3,887  |
| lgg-1(G116A) vs. RNAi unc-51                                | 87.64           | 75.76        | 11.88           | 33               | 29  | 0,7906 |
| lgg-1(G116A) vs. lgg-1(tm3489) RNAi unc-51                  | 87.64           | 48.39        | 39.25           | 33               | 9   | 1,768  |
| lgg-1(G116A) vs. lgg-1(G116A) RNAi unc-51                   | 87.64           | 69.49        | 18.15           | 33               | 36  | 1,276  |
| lgg-1(G116A) vs. lgg-1(G116AG117*) RNAi unc-51              | 87.64           | 118.8        | -31.20          | 33               | 28  | 2,058  |
| lgg-1(G116AG117*) vs. RNAi unc-51                           | 147.2           | 75.76        | 71.41           | 27               | 29  | 4,524  |
| lgg-1(G116AG117*) vs. lgg-1(tm3489) RNAi unc-51             | 147.2           | 48.39        | 98.78           | 27               | 9   | 4,348  |
| lgg-1(G116AG117*) vs. lgg-1(G116A) RNAi unc-51              | 147.2           | 69.49        | 77.68           | 27               | 36  | 5,170  |
| lgg-1(G116AG117*) vs. lgg-1(G116AG117*) RNAi unc-51         | 147.2           | 118.8        | 28.33           | 27               | 28  | 1,779  |
| RNAi unc-51 vs. lgg-1(tm3489) RNAi unc-51                   | 75.76           | 48.39        | 27.37           | 29               | 9   | 1,215  |
| RNAi unc-51 vs. lgg-1(G116A) RNAi unc-51                    | 75.76           | 69.49        | 6,273           | 29               | 36  | 0,4259 |
| RNAi unc-51 vs. lgg-1(G116AG117*) RNAi unc-51               | 75.76           | 118.8        | -43,08          | 29               | 28  | 2,755  |
| lgg-1(tm3489) RNAi unc-51 vs. lgg-1(G116A) RNAi unc-51      | 48.39           | 69.49        | -21,10          | 9                | 36  | 0,9591 |
| lgg-1(tm3489) RNAi unc-51 vs. lgg-1(G116AG117*) RNAi unc-51 | 48.39           | 118.8        | -70.45          | 9                | 28  | 3,115  |
| lgg-1(G116A) RNAi unc-51 vs. lgg-1(G116AG117*) RNAi unc-51  | 69.49           | 118.8        | -49,35          | 36               | 28  | 3,318  |
