# Supplementary material for: LGG-1/GABARAP lipidation is not required for autophagy and development in Caenorhabditis elegans
Source: eLife journal article supplement (doi:10.7554/elife.85748), 2023-07-03
Supplement: supp [file elife-85748-supp-v1.zip]

LGG-1 puncta early embryo

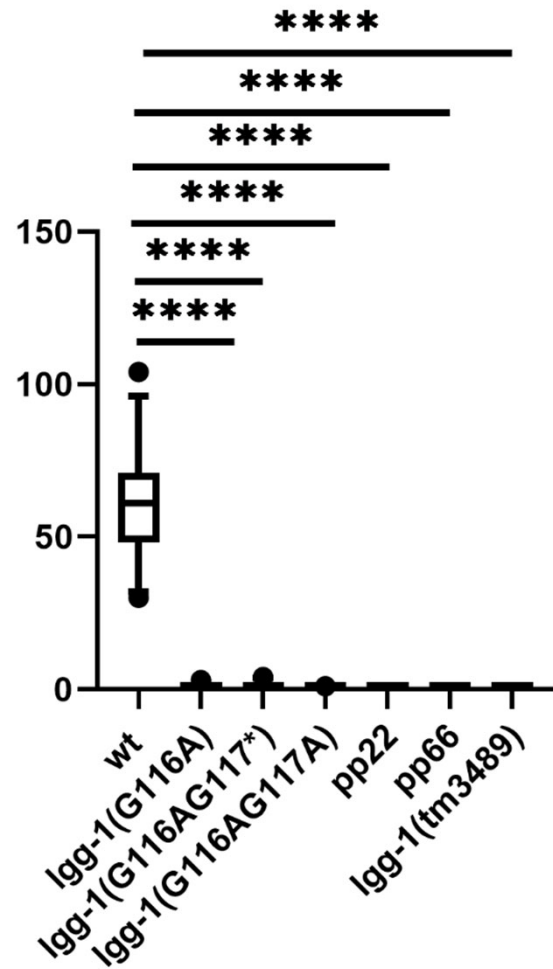

LGG-1 puncta late embryo

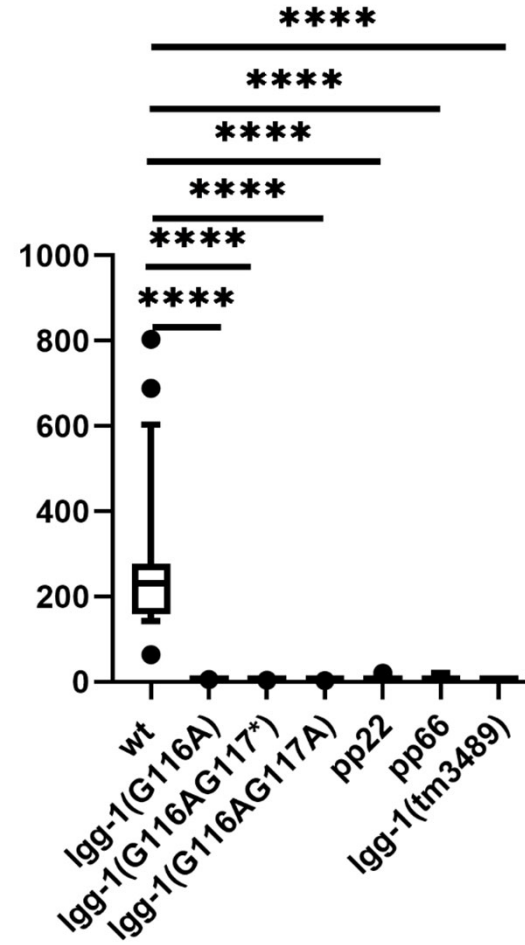

Test man Whitney p value 0,05

|                                         |                     |
|-----------------------------------------|---------------------|
| Table Analyzed                          | manip de 2018,12,20 |
| Column B                                | atg4,1              |
| vs.                                     | vs,                 |
| Column A                                | N2                  |
| Unpaired t test with Welch's correction |                     |
| P value                                 | 0,0081              |
| P value summary                         | **                  |
| Significantly different (P < 0.05)?     | Yes                 |
| One- or two-tailed P value?             | Two-tailed          |
| Welch-corrected t, df                   | t=3,417, df=8,696   |

|                                         |                     |
|-----------------------------------------|---------------------|
| Table Analyzed                          | manip de 2018,12,20 |
| Column C                                | lgg-1(G116A)        |
| vs.                                     | vs,                 |
| Column B                                | atg4,1              |
| Unpaired t test with Welch's correction |                     |
| P value                                 | 0,0002              |
| P value summary                         | ***                 |
| Significantly different (P < 0.05)?     | Yes                 |
| One- or two-tailed P value?             | Two-tailed          |
| Welch-corrected t, df                   | t=9,544, df=5,000   |

|                                         |                     |
|-----------------------------------------|---------------------|
| Table Analyzed                          | manip de 2018,12,20 |
| Column C                                | lgg-1(G116A)        |
| vs.                                     | vs,                 |
| Column A                                | N2                  |
| Unpaired t test with Welch's correction |                     |
| P value                                 | <0,0001             |
| P value summary                         | ****                |
| Significantly different (P < 0.05)?     | Yes                 |
| One- or two-tailed P value?             | Two-tailed          |
| Welch-corrected t, df                   | t=20,54, df=5,000   |

Complément Figure 1- Graph number of LGG-1 puncta in embryos

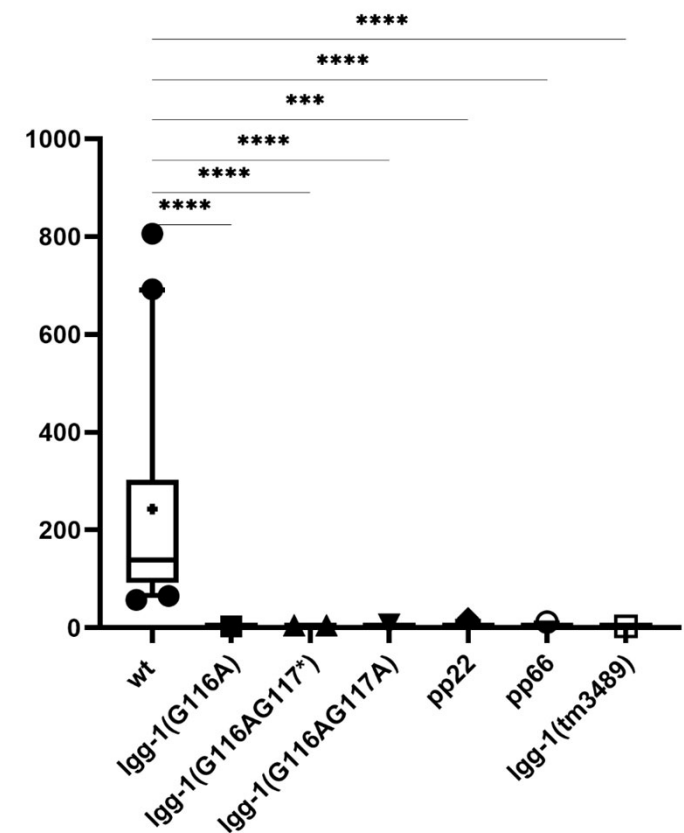

10-90 percentile  
+ is mean

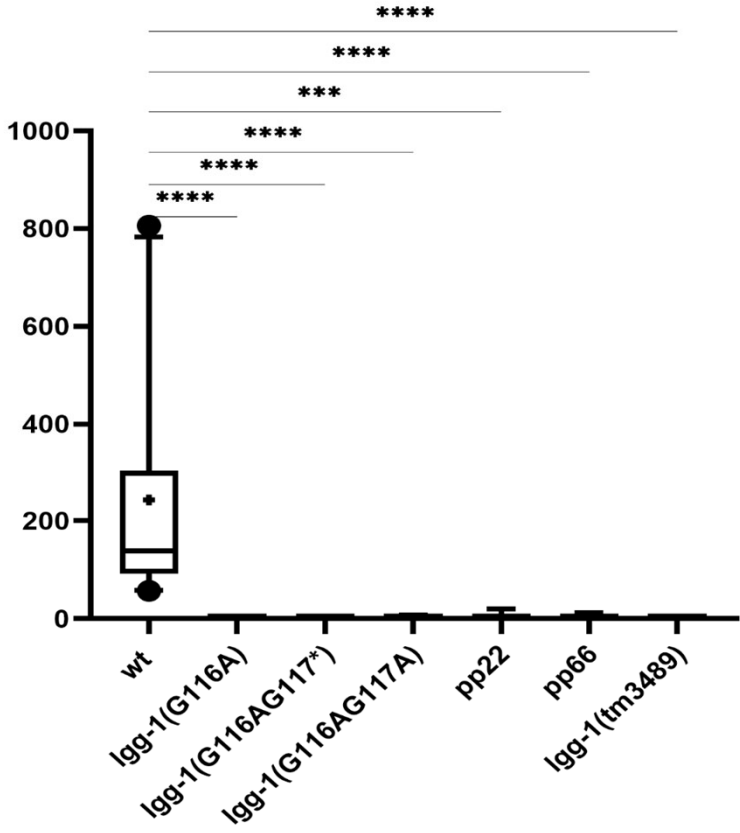

5-95 percentile  
+ is mean

## Kruskall Wallis test

| Dunn's multiple comparisons test        | Mean rank diff, | Significant? | Summary | Adjusted P Value |     |
|-----------------------------------------|-----------------|--------------|---------|------------------|-----|
| wt vs. lgg-1(G116A)                     | 64,47           | Yes          | ****    | <0,0001          | A-B |
| wt vs. lgg-1(G116AG117*)                | 44,86           | Yes          | ****    | <0,0001          | A-C |
| wt vs. lgg-1(G116AG117A)                | 63,93           | Yes          | ****    | <0,0001          | A-D |
| wt vs. pp22                             | 43,93           | Yes          | ***     | 0,0010           | A-E |
| wt vs. pp66                             | 59,50           | Yes          | ****    | <0,0001          | A-F |
| wt vs. lgg-1(tm3489)                    | 71,71           | Yes          | ****    | <0,0001          | A-G |
| lgg-1(G116A) vs. lgg-1(G116AG117*)      | -19,62          | No           | ns      | >0,9999          | B-C |
| lgg-1(G116A) vs. lgg-1(G116AG117A)      | -0,5437         | No           | ns      | >0,9999          | B-D |
| lgg-1(G116A) vs. pp22                   | -20,54          | No           | ns      | >0,9999          | B-E |
| lgg-1(G116A) vs. pp66                   | -4,972          | No           | ns      | >0,9999          | B-F |
| lgg-1(G116A) vs. lgg-1(tm3489)          | 7,236           | No           | ns      | >0,9999          | B-G |
| lgg-1(G116AG117*) vs. lgg-1(G116AG117A) | 19,07           | No           | ns      | >0,9999          | C-D |
| lgg-1(G116AG117*) vs. pp22              | -0,9286         | No           | ns      | >0,9999          | C-E |
| lgg-1(G116AG117*) vs. pp66              | 14,64           | No           | ns      | >0,9999          | C-F |
| lgg-1(G116AG117*) vs. lgg-1(tm3489)     | 26,85           | No           | ns      | 0,4152           | C-G |
| lgg-1(G116AG117A) vs. pp22              | -20,00          | No           | ns      | >0,9999          | D-E |
| lgg-1(G116AG117A) vs. pp66              | -4,429          | No           | ns      | >0,9999          | D-F |
| lgg-1(G116AG117A) vs. lgg-1(tm3489)     | 7,780           | No           | ns      | >0,9999          | D-G |
| pp22 vs. pp66                           | 15,57           | No           | ns      | >0,9999          | E-F |
| pp22 vs. lgg-1(tm3489)                  | 27,78           | No           | ns      | 0,5576           | E-G |
| pp66 vs. lgg-1(tm3489)                  | 12,21           | No           | ns      | >0,9999          | F-G |
