# Supplementary material for: LGG-1/GABARAP lipidation is not required for autophagy and development in Caenorhabditis elegans
Source: eLife journal article supplement (doi:10.7554/elife.85748), 2023-07-03
Supplement: supp [file elife-85748-supp-v1.zip]

|                                  |      |
|----------------------------------|------|
| Number of families               | 1    |
| Number of comparisons per family | 28   |
| Alpha                            | 0,05 |

| Dunn's multiple comparisons test                               | Mean rank diff, | Significant? | Summary | Adjusted P Value |     |
|----------------------------------------------------------------|-----------------|--------------|---------|------------------|-----|
| atg18GFP vs. GA atg18GFPL4440                                  | -71,20          | No           | ns      | >0,9999          | A-B |
| atg18GFP vs. GAstop atg18GFPL4440                              | -34,57          | No           | ns      | >0,9999          | A-C |
| atg18GFP vs. lgg-1(tm3489) atg18GFP L4440                      | -254,1          | Yes          | ****    | <0,0001          | A-D |
| atg18GFP vs. unc-51                                            | 169,0           | Yes          | ***     | 0,0004           | A-E |
| atg18GFP vs. GA atg18GFP RNAi unc-51                           | 269,9           | Yes          | ****    | <0,0001          | A-F |
| atg18GFP vs. GAstop atg18GFP unc-51                            | -132,5          | Yes          | *       | 0,0275           | A-G |
| atg18GFP vs. lgg-1(tm3489) atg18GFP unc-51                     | 157,1           | Yes          | **      | 0,0036           | A-H |
| GA atg18GFPL4440 vs. GAstop atg18GFPL4440                      | 36,63           | No           | ns      | >0,9999          | B-C |
| GA atg18GFPL4440 vs. lgg-1(tm3489) atg18GFP L4440              | -182,9          | Yes          | ****    | <0,0001          | B-D |
| GA atg18GFPL4440 vs. unc-51                                    | 240,2           | Yes          | ****    | <0,0001          | B-E |
| GA atg18GFPL4440 vs. GA atg18GFP RNAi unc-51                   | 341,1           | Yes          | ****    | <0,0001          | B-F |
| GA atg18GFPL4440 vs. GAstop atg18GFP unc-51                    | -61,31          | No           | ns      | >0,9999          | B-G |
| GA atg18GFPL4440 vs. lgg-1(tm3489) atg18GFP unc-51             | 228,3           | Yes          | ****    | <0,0001          | B-H |
| GAstop atg18GFPL4440 vs. lgg-1(tm3489) atg18GFP L4440          | -219,5          | Yes          | ****    | <0,0001          | C-D |
| GAstop atg18GFPL4440 vs. unc-51                                | 203,6           | Yes          | ****    | <0,0001          | C-E |
| GAstop atg18GFPL4440 vs. GA atg18GFP RNAi unc-51               | 304,5           | Yes          | ****    | <0,0001          | C-F |
| GAstop atg18GFPL4440 vs. GAstop atg18GFP unc-51                | -97,94          | No           | ns      | 0,2068           | C-G |
| GAstop atg18GFPL4440 vs. lgg-1(tm3489) atg18GFP unc-51         | 191,7           | Yes          | ****    | <0,0001          | C-H |
| lgg-1(tm3489) atg18GFP L4440 vs. unc-51                        | 423,1           | Yes          | ****    | <0,0001          | D-E |
| lgg-1(tm3489) atg18GFP L4440 vs. GA atg18GFP RNAi unc-51       | 524,1           | Yes          | ****    | <0,0001          | D-F |
| lgg-1(tm3489) atg18GFP L4440 vs. GAstop atg18GFP unc-51        | 121,6           | Yes          | ***     | 0,0004           | D-G |
| lgg-1(tm3489) atg18GFP L4440 vs. lgg-1(tm3489) atg18GFP unc-51 | 411,2           | Yes          | ****    | <0,0001          | D-H |
| unc-51 vs. GA atg18GFP RNAi unc-51                             | 100,9           | Yes          | **      | 0,0050           | E-F |
| unc-51 vs. GAstop atg18GFP unc-51                              | -301,5          | Yes          | ****    | <0,0001          | E-G |
| unc-51 vs. lgg-1(tm3489) atg18GFP unc-51                       | -11,92          | No           | ns      | >0,9999          | E-H |
| GA atg18GFP RNAi unc-51 vs. GAstop atg18GFP unc-51             | -402,4          | Yes          | ****    | <0,0001          | F-G |
| GA atg18GFP RNAi unc-51 vs. lgg-1(tm3489) atg18GFP unc-51      | -112,8          | Yes          | **      | 0,0040           | F-H |
| GAstop atg18GFP unc-51 vs. lgg-1(tm3489) atg18GFP unc-51       | 289,6           | Yes          | ****    | <0,0001          | G-H |

| Test details                                                   | Mean rank 1 | Mean rank 2 | Mean rank<br>diff, | n1  | n2  |
|----------------------------------------------------------------|-------------|-------------|--------------------|-----|-----|
| atg18GFP vs. GA atg18GFPL4440                                  | 411,6       | 482,8       | -71,20             | 42  | 45  |
| atg18GFP vs. GAstop atg18GFPL4440                              | 411,6       | 446,2       | -34,57             | 42  | 55  |
| atg18GFP vs. lgg-1(tm3489) atg18GFP L4440                      | 411,6       | 665,7       | -254,1             | 42  | 140 |
| atg18GFP vs. unc-51                                            | 411,6       | 242,6       | 169,0              | 42  | 145 |
| atg18GFP vs. GA atg18GFP RNAi unc-51                           | 411,6       | 141,7       | 269,9              | 42  | 130 |
| atg18GFP vs. GAstop atg18GFP unc-51                            | 411,6       | 544,1       | -132,5             | 42  | 115 |
| atg18GFP vs. lgg-1(tm3489) atg18GFP unc-51                     | 411,6       | 254,5       | 157,1              | 42  | 100 |
| GA atg18GFPL4440 vs. GAstop atg18GFPL4440                      | 482,8       | 446,2       | 36,63              | 45  | 55  |
| GA atg18GFPL4440 vs. lgg-1(tm3489) atg18GFP L4440              | 482,8       | 665,7       | -182,9             | 45  | 140 |
| GA atg18GFPL4440 vs. unc-51                                    | 482,8       | 242,6       | 240,2              | 45  | 145 |
| GA atg18GFPL4440 vs. GA atg18GFP RNAi unc-51                   | 482,8       | 141,7       | 341,1              | 45  | 130 |
| GA atg18GFPL4440 vs. GAstop atg18GFP unc-51                    | 482,8       | 544,1       | -61,31             | 45  | 115 |
| GA atg18GFPL4440 vs. lgg-1(tm3489) atg18GFP unc-51             | 482,8       | 254,5       | 228,3              | 45  | 100 |
| GAstop atg18GFPL4440 vs. lgg-1(tm3489) atg18GFP L4440          | 446,2       | 665,7       | -219,5             | 55  | 140 |
| GAstop atg18GFPL4440 vs. unc-51                                | 446,2       | 242,6       | 203,6              | 55  | 145 |
| GAstop atg18GFPL4440 vs. GA atg18GFP RNAi unc-51               | 446,2       | 141,7       | 304,5              | 55  | 130 |
| GAstop atg18GFPL4440 vs. GAstop atg18GFP unc-51                | 446,2       | 544,1       | -97,94             | 55  | 115 |
| GAstop atg18GFPL4440 vs. lgg-1(tm3489) atg18GFP unc-51         | 446,2       | 254,5       | 191,7              | 55  | 100 |
| lgg-1(tm3489) atg18GFP L4440 vs. unc-51                        | 665,7       | 242,6       | 423,1              | 140 | 145 |
| lgg-1(tm3489) atg18GFP L4440 vs. GA atg18GFP RNAi unc-51       | 665,7       | 141,7       | 524,1              | 140 | 130 |
| lgg-1(tm3489) atg18GFP L4440 vs. GAstop atg18GFP unc-51        | 665,7       | 544,1       | 121,6              | 140 | 115 |
| lgg-1(tm3489) atg18GFP L4440 vs. lgg-1(tm3489) atg18GFP unc-51 | 665,7       | 254,5       | 411,2              | 140 | 100 |
| unc-51 vs. GA atg18GFP RNAi unc-51                             | 242,6       | 141,7       | 100,9              | 145 | 130 |
| unc-51 vs. GAstop atg18GFP unc-51                              | 242,6       | 544,1       | -301,5             | 145 | 115 |
| unc-51 vs. lgg-1(tm3489) atg18GFP unc-51                       | 242,6       | 254,5       | -11,92             | 145 | 100 |
| GA atg18GFP RNAi unc-51 vs. GAstop atg18GFP unc-51             | 141,7       | 544,1       | -402,4             | 130 | 115 |
| GA atg18GFP RNAi unc-51 vs. lgg-1(tm3489) atg18GFP unc-51      | 141,7       | 254,5       | -112,8             | 130 | 100 |
| GAstop atg18GFP unc-51 vs. lgg-1(tm3489) atg18GFP unc-51       | 544,1       | 254,5       | 289,6              | 115 | 100 |
