# Supplementary material for: LGG-1/GABARAP lipidation is not required for autophagy and development in Caenorhabditis elegans
Source: eLife journal article supplement (doi:10.7554/elife.85748), 2023-07-03
Supplement: supp [file elife-85748-supp-v1.zip]

Source data for Figure 1 M

1. N2

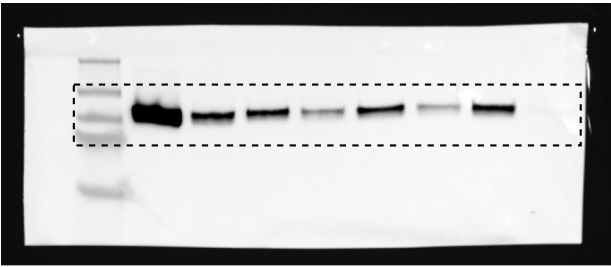

anti-CDC-48

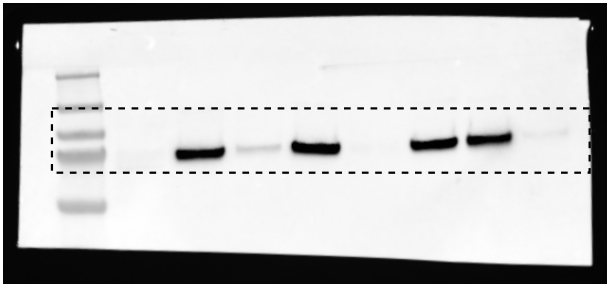

anti-SEL-1

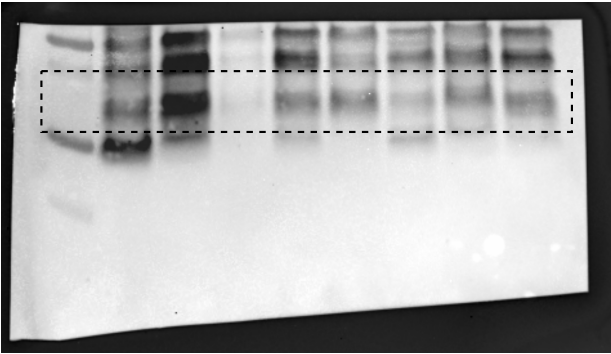

anti-LGG-2

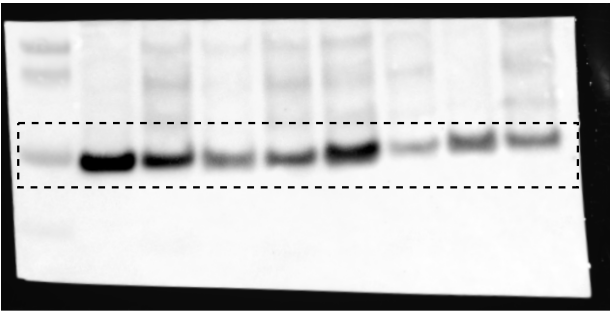

anti-LGG-1

2. lgg-1(G116A)

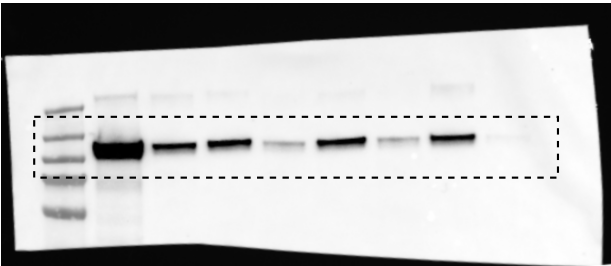

anti-CDC-48

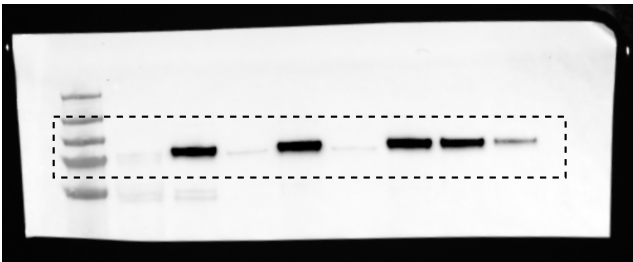

anti-SEL-1

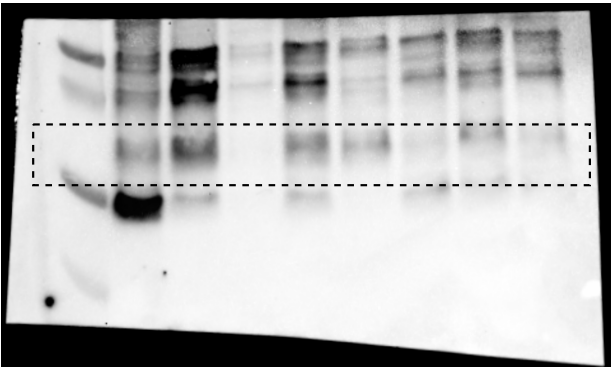

anti-LGG-2

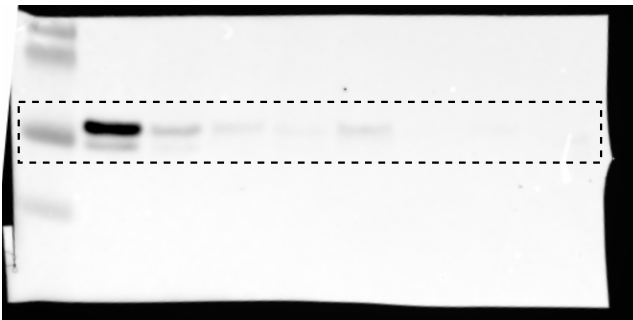

anti-LGG-1

3. Igg-1(G116G117\*)

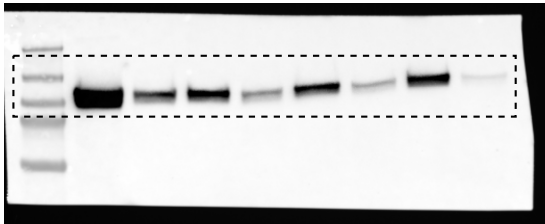

anti-CDC-48

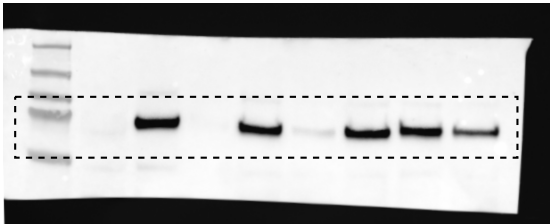

anti-SEL-1

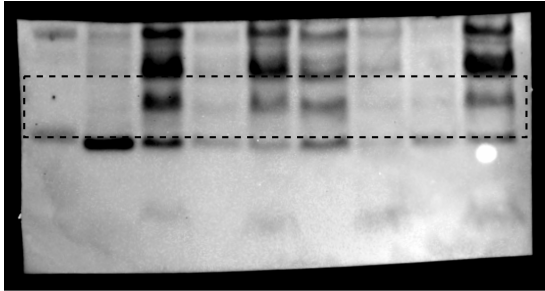

anti-LGG-2

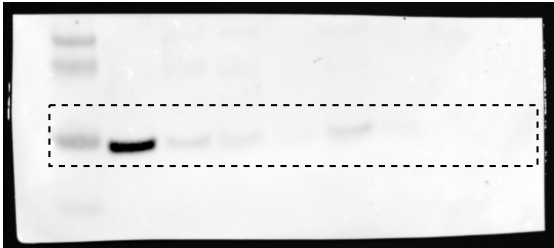

anti-LGG-1
