# Supplementary material for: LGG-1/GABARAP lipidation is not required for autophagy and development in Caenorhabditis elegans
Source: eLife journal article supplement (doi:10.7554/elife.85748), 2023-07-03
Supplement: supp [file elife-85748-supp-v1.zip]

Survival analysis by Kaplan-Meier curves and log-rank (Mantel-Cox) test

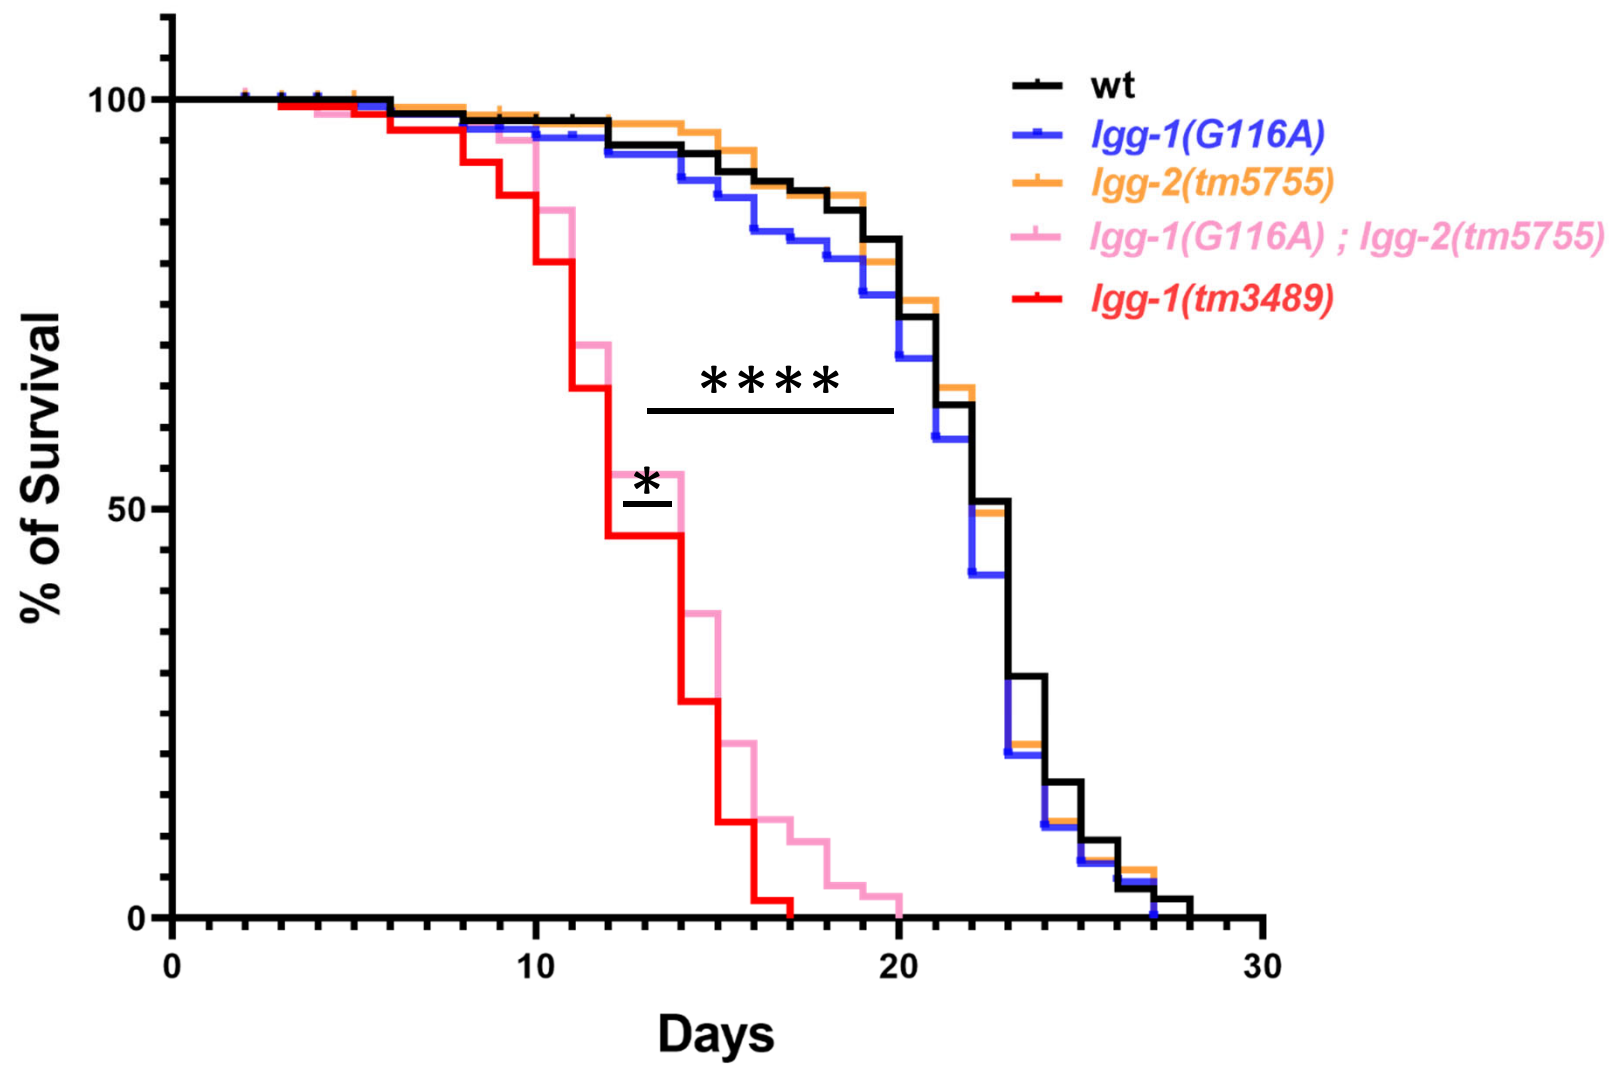

*lgg-1(tm3489) vs lgg-1(G116A); lgg-2(tm5755)*

| Comparison of Survival Curves          |        |
|----------------------------------------|--------|
| Log-rank (Mantel-Cox) test             |        |
| Chi square                             | 5.936  |
| df                                     | 1      |
| P value                                | 0.0148 |
| P value summary                        | *      |
| Are the survival curves sig different? | Yes    |
| Gehan-Breslow-Wilcoxon test            |        |
| Chi square                             | 3.056  |
| df                                     | 1      |
| P value                                | 0.0804 |
| P value summary                        | ns     |
| Are the survival curves sig different? | No     |

*lgg-1(G116A) vs lgg-2(tm5755)*

| Comparison of Survival Curves          |        |
|----------------------------------------|--------|
| Log-rank (Mantel-Cox) test             |        |
| Chi square                             | 0.8623 |
| df                                     | 1      |
| P value                                | 0.3531 |
| P value summary                        | ns     |
| Are the survival curves sig different? | No     |
| Gehan-Breslow-Wilcoxon test            |        |
| Chi square                             | 1.340  |
| df                                     | 1      |
| P value                                | 0.2470 |
| P value summary                        | ns     |
| Are the survival curves sig different? | No     |

*lgg-1(tm3489) vs wt*

| Comparison of Survival Curves          |         |
|----------------------------------------|---------|
| Log-rank (Mantel-Cox) test             |         |
| Chi square                             | 174.0   |
| df                                     | 1       |
| P value                                | <0.0001 |
| P value summary                        | ****    |
| Are the survival curves sig different? | Yes     |
| Gehan-Breslow-Wilcoxon test            |         |
| Chi square                             | 131.5   |
| df                                     | 1       |
| P value                                | <0.0001 |
| P value summary                        | ****    |
| Are the survival curves sig different? | Yes     |

*wt vs lgg-1(G116A)*

| Comparison of Survival Curves          |        |
|----------------------------------------|--------|
| Log-rank (Mantel-Cox) test             |        |
| Chi square                             | 1.927  |
| df                                     | 1      |
| P value                                | 0.1651 |
| P value summary                        | ns     |
| Are the survival curves sig different? | No     |
| Gehan-Breslow-Wilcoxon test            |        |
| Chi square                             | 1.977  |
| df                                     | 1      |
| P value                                | 0.1597 |
| P value summary                        | ns     |
| Are the survival curves sig different? | No     |

*wt vs lgg-2(tm5755)*

| Comparison of Survival Curves          |        |
|----------------------------------------|--------|
| Log-rank (Mantel-Cox) test             |        |
| Chi square                             | 0.2874 |
| df                                     | 1      |
| P value                                | 0.5919 |
| P value summary                        | ns     |
| Are the survival curves sig different? | No     |
| Gehan-Breslow-Wilcoxon test            |        |
| Chi square                             | 0.1008 |
| df                                     | 1      |
| P value                                | 0.7509 |
| P value summary                        | ns     |
| Are the survival curves sig different? | No     |
