# Supplementary material for: LGG-1/GABARAP lipidation is not required for autophagy and development in Caenorhabditis elegans
Source: eLife journal article supplement (doi:10.7554/elife.85748), 2023-07-03
Supplement: supp [file figure1M-Mean gray intensity LGG-1 .xlsx]

## Sheet: embryon précoce
Embryon précoce		Area	Mean	Min	Max	IntDen	RawIntDen
N2	1	82.446	1644.93	814	5551	135618.994	16449353.000
Exp6901	2	82.446	1667.37	785	7737	137468.654	16673700.000
	3	82.446	1857.22	1663	2145	153121.103	18572200.000
Exp6903	4	82.446	1438.63	613	5429	118609.733	14386284.000
	1	82.446	1420.81	643	4309	117140.249	14208049
		82.446	1438.63	613	5429	118609.733	14386284
Exp69034	1	82.446	2101.16	1797	2672	173233.012	21011592
	2	82.446	2037.55	1725	3010	167989.025	20375544
	3	82.446	1945.48	1583	4217	160398.202	19454846
Exp69035	4	82.446	3580.86	2375	13553	295228.703	35808562
	5	82.446	3421.41	2245	5654	282082.657	34214066
	6	82.446	2790.28	2234	12992	230048.533	27902799
Exp6918	10	82.446	2481.08	1537	3160	204556.411	24810836.000
	11	82.446	2702.99	2383	3724	222851.646	27029882.000
	12	82.446	2004.33	907	9696	165249.793	20043300.000
Exp6919 droite	16	82.446	2943.82	1989	9050	242707.691	29438240.000
	17	82.446	2082.6	1804	2751	171703.136	20826032.000
	18	82.446	2131.59	1620	2407	175741.823	21315888.000
Exp6923	22	82.446	2953.28	1414	16383	243487.510	29532825.000
	23	82.446	2689.52	2393	3064	221741.176	26895192.000
	24	82.446	2228.12	1103	2881	183700.910	22281253.000
Exp6928	34	82.446	2841.74	2294	3339	234291.554	28417439.000
	35	82.446	3037.04	2766	3603	250393.081	30370408.000
	36	82.446	2606.14	1295	3286	214867.290	26061452.000
Exp6929	37	82.446	2881.1	2198	8557	237536.183	28810983.000
	38	82.446	2901.07	2427	3446	239183.107	29010740.000
	39	82.446	2776.59	2453	4328	228920.171	27765939.000
Exp6929	40	82.446	3416.58	2432	4503	281684.474	34165770.000
	41	82.446	3760.11	2375	10624	310007.583	37601106.000
	42	82.446	3469.45	2276	7195	286044.009	34694542.000
Exp6931	2	82.446	2959.94	2470	3310	244036.158	29599371
	3	82.446	3696.06	2013	16383	304726.907	36960608
	4	82.446	2715.67	1556	3293	223897.372	27156719
moyenne			2564.34
lgg-1(tm3489)	8	82.446	1452.71	1192	1731	119770.429	14527066.000
	9	82.446	1820.52	1570	2174	150095.436	18205214.000
	10	82.446	1760.09	1440	2030	145113.249	17600920.000
	23	82.446	2096.3	1843	2365	172832.364	20962997.000
	24	82.446	2110.65	1806	2556	174015.643	21106518.000
	25	82.446	1017.73	1793	2367	166354.863	20177335.000
Exp 7032	32	82.446	2316.16	1012	2973	190959.235	23161622.000
Embryon du haut	33	82.446	2557.96	1520	3040	210894.808	25579626.000
	34	82.446	1961.21	679	2641	161695.108	19612149.000
Exp 7033	35	82.446	2764.51	1769	3609	227923.469	27645048.000
	36	82.446	3005.43	2202	3860	247786.859	30054297.000
	37	82.446	1324.17	942	3411	191619.243	23241675.000
Exp 7035 haut	1	82.446	1989.05	1331	2520	163989.657	19890457
	2	82.446	1955.5	1558	2307	161224.199	19555032
	3	82.446	1939.81	1612	2299	159930.244	19398087
Exp 7035 bas	4	82.446	1919.7	1569	2234	158272.008	19196958
	5	82.446	2053.3	1837	2293	169287.556	20533044
	6	82.446	1798.85	1020	2222	148308.542	17988480
Exp 7034	7	82.446	2003.76	1153	2378	165202.444	20037557
	8	82.446	2228.18	1885	2611	183705.758	22281841
	9	82.446	2217.47	1862	2577	182822.245	22174679
Exp6932 bas gauche	10	82.446	1219.75	985	1502	100564.029	12197504.000
	11	82.446	1351.03	1117	1567	111387.172	13510253.000
	12	82.446	1316.4	1141	2130	108532.795	13164043.000
Exp6932 bas droit	13	82.446	1792.25	1442	2121	147764.824	17922532.000
	14	82.446	1703.11	1354	2183	140414.950	17031059.000
	15	82.446	1940.13	1632	2230	159956.619	19401286.000
moyenne			1911.69
lgg-1(G116A)	4	82.446	1999.83	1344	2389	164878.652	19998284
Exp 6909	5	82.446	1979.88	1649	2290	163233.830	19798782
	6	82.446	2027.71	1677	2390	167177.332	20277093
Exp 6934	7	82.446	3840.69	2583	5091	316651.188	38406915
	8	82.446	4198.68	2876	5070	346165.713	41986759
	9	82.446	4103.02	1891	5919	338279.533	41030237
Exp6940	25	82.446	3299.47	2180	4080	272029.135	32994665.000
	26	82.446	3553.46	2930	4096	292970.067	35534610.000
	27	82.446	3398.56	2708	4072	280199.285	33985630.000
Exp6943	31	82.446	3302.68	2957	4008	272294.002	33026791.000
	32	82.446	3171.35	2755	3758	261466.094	31713464.000
	33	82.446	3414.76	3045	3955	281534.595	34147591.000
Exp6944	34	82.446	2606.93	1879	2997	214931.812	26069278.000
	35	82.446	2579.52	2023	3230	212672.253	25795214.000
	36	82.446	2778.84	2008	3899	229105.725	27788445.000
Exp7029	37	82.446	3717.02	2939	4582	306455.008	37170211.000
	38	82.446	3776.67	1432	4582	311373.142	37766736.000
	39	82.446	3187.33	2210	4079	262783.892	31873301.000
Exp7042 milieu bas	10	82.446	2735.12	2077	3416	225500.666	27351184.000
	11	82.446	2755.63	1684	3805	227191.460	27556262.000
	12	82.446	3015.06	2485	3441	248580.488	30150557.000
Exp7042 bas a droite	13	82.446	3559.62	2346	4661	293477.887	35596204.000
	14	82.446	3586.92	2831	4209	295728.550	35869189.000
	15	82.446	3155.04	2243	3828	260121.855	31550420.000
			3155.99
lgg-1(G116AG117*)
Exp 6912	1	82.446	4161.64	3390	7144	343111.799	41616347.000
	2	82.446	3971.48	3337	6609	327434.278	39714806.000
	3	82.446	3558.66	2887	6207	293398.706	35586600.000
Exp 6913	4	82.446	2580.32	2151	3679	212737.732	25803156.000
	5	82.446	2389.93	1921	3373	197041.389	23899332.000
	6	82.446	2287.69	1714	3361	188611.772	22876896.000
Exp 6961	7	82.446	2423.79	1206	2841	199832.719	24237895.000
	8	82.446	2137.62	808	2719	176239.164	21376211.000
	9	82.446	1790.36	1209	2371	147608.803	17903608.000
Exp 6970	19	82.446	2487.07	1867	3668	205050.314	24870742.000
	20	82.446	2576.89	2263	2943	212455.716	25768950.000
	21	82.446	2681.63	2014	3584	221090.492	26816270.000
Exp 6971	22	82.446	2908.6	2449	5023	239803.632	29086004.000
	23	82.446	3636.94	2855	6436	299852.899	36369435.000
	24	82.446	3754.01	2486	5838	309504.429	37540078.000
Exp 6972	25	82.446	5037.36	3715	10861	415312.008	50373577.000
	26	82.446	5132.32	4267	7222	423141.538	51323228.000
	27	82.446	4784.86	3996	7133	394494.787	47848637.000
Exp 6973	28	82.446	4557.11	3828	7034	375717.042	45571067.000
	29	82.446	4310.66	3707	4909	355398.193	43106575.000
	30	82.446	4322.86	3481	4793	356404.377	43228616.000
Exp 6974	31	82.446	4396.16	3861	4839	362447.417	43961582.000
	32	82.446	4185.79	3290	4816	345103.160	41857881.000
	33	82.446	3777.38	2800	4414	311431.209	37773779.000
moyenne			3493.8

## Sheet: embryons tardif
Embryon tardif N2		Area	Mean	Min	Max	IntDen	RawIntDen
Exp6901	1	185.504	4247.52	1981	9789	787934.465	42475244
	2	185.504	3697.712	2537	8670	685941.790	36977117
	1	185.504	5071.267	3220	9720	940742.379	50712672
Exp6916	7	82.446	2407.700	1830	3088	198506.197	24077000
	8	82.446	2573.134	1877	4201	212145.602	25731336
	9	82.446	2600.151	2081	3080	214373.122	26001514.000
Exp6919 droite	13	82.446	2852.411	2310	3547	235171.027	28524111.000
	14	82.446	3081.449	2450	3711	254054.344	30814486.000
	15	82.446	2514.566	2038	3100	207316.931	25145662.000
Exp6922	19	82.446	1671.659	1268	6616	137822.225	16716585.000
	20	82.446	1506.772	1221	2342	124227.935	15067721.000
	21	82.446	1278.794	1006	3465	105431.929	12787936.000
Exp6924	25	82.446	3666.811	3055	7095	302315.399	36668114.000
	26	82.446	3481.376	2860	5019	287026.894	34813757.000
	27	82.446	2735.288	2103	5654	225514.673	27352883.000
Exp6925	28	82.446	3396.224	2716	4402	280006.401	33962235.000
	29	82.446	3161.232	2689	3722	260632.231	31612324.000
	30	82.446	2876.259	2336	3490	237137.217	28762592.000
Exp6926	31	82.446	2738.416	1954	4070	225772.566	27384163.000
	32	82.446	2483.610	2100	3086	204764.679	24836097.000
	33	82.446	2750.246	2005	3332	226747.890	27502461.000
Moyenne			4247.52
lgg-1(tm3489)	3	82.446	2045.25	1823	2328	168623.417	20452490.000
Exp6933	4	82.446	2036.93	1741	2390	167937.925	20369346.000
	5	82.446	2096.95	1800	2389	172886.391	20969550.000
Exp6933	11	82.446	2027.04	1800	2282	167121.994	20270381.000
2ème ligne	12	82.446	1929.33	1751	2550	159066.560	19293330.000
2ème embryons	13	82.446	1840	1587	2066	151701.038	18399959.000
Exp6933	14	82.446	2281.53	2023	2705	188103.572	22815256.000
première ligne	15	82.446	2271.82	1998	2753	187303.537	22718219.000
2ème embryons	16	82.446	2326.79	1944	2790	191835.129	23267860.000
Exp6933	17	82.446	2179.18	1900	2874	179665.719	21791821.000
première ligne	18	82.446	2154.71	1887	2664	177648.140	21547107.000
3ème embryons	19	82.446	2186.83	1900	2639	180295.964	21868264.000
Exp6933	20	82.446	1771.69	1476	2071	146069.883	17716951.000
première ligne	21	82.446	1981.89	1731	2216	163399.960	19818932.000
1er embryon	22	82.446	2076.58	1850	2397	171206.735	20765823.000
Exp6933	23	82.446	2096.3	1843	2365	172832.364	20962997.000
deuxième ligne	24	82.446	2110.65	1806	2556	174015.643	21106518.000
1er embryon	25	82.446	2017.73	1793	2367	166354.863	20177335.000
Exp7032	26	82.446	2187.49	1708	2615	180350.560	21874886.000
EMBRYON du bas	27	82.446	2643.83	2370	2922	217974.389	26438315.000
	28	82.446	2626.59	2117	2962	216552.733	26265881.000
EMBRYON du haut	16	82.446	1868.26	1572	2214	154031.072	18682571.000
Exp6932	17	82.446	1965.49	1737	2234	162047.962	19654947.000
	18	82.446	1895.94	1648	2109	156313.081	18959358.000
Exp6932	19	82.446	1712.12	1501	1916	141158.139	17121201.000
embryon haut à droite	20	82.446	1726.53	1488	1957	142346.257	17265309.000
	21	82.446	1613.96	1334	1839	133065.002	16139577.000
Exp7038	22	82.446	2050.83	867	2779	169083.328	20508273.000
	23	82.446	2878.37	2451	3278	237311.063	28783678.000
	24	82.446	2404.05	1037	3135	198204.880	24040453.000
Moyenne			2100.16
lgg-1(G116A)
Exp6908	1	82.446	4922.643	3529	6014	405854.202	49226431
	2	82.446	5190.786	4507	6047	427961.611	51907859
	3	82.446	4243.584	2823	5145	349868.191	42435836
Exp 6935	10	82.446	4813.025	3261	5847	396816.576	48130249
	11	82.446	4943.386	2120	5885	407564.371	49433859
	12	82.446	5207.646	4538	5858	429351.632	52076456
Exp 6936	13	82.446	3016.735	2511	3719	248718.973	30167354
	14	82.446	2650.727	2197	3153	218542.882	26507268
	15	82.446	2659.230	2210	3356	219243.924	26592298
Exp 6937	16	82.446	3762.259	2494	5042	310184.735	37622593
	17	82.446	4339.447	3769	5042	357771.750	43394466
	18	82.446	4432.857	3828	5118	365473.110	44328571
Exp 6938	19	82.446	5389.156	3636	6674	444316.503	53891559
	20	82.446	5938.705	4819	6824	489624.856	59387051
	21	82.446	5671.192	3304	7293	467569.389	56711923
Exp 6939	22	82.446	4524.755	3625	5248	373049.728	45247546
	23	82.446	4938.515	4477	5481	407162.767	49385148
	24	82.446	4337.341	2420	5376	357598.118	43373406.000
Exp 6941	28	82.446	4063.381	2505	4969	335011.119	40633808.000
	29	82.446	4710.016	4267	5102	388323.855	47100159.000
	30	82.446	4318.545	3410	4959	356048.505	43185452.000
Exp 7040 gauche	1	82.446	3459.338	2577	4137	285209.948	34593378
	2	82.446	3511.134	1790	4522	289480.333	35111337
	3	82.446	3361.704	2741	4548	277160.376	33617038
Exp 7040 milieu	4	82.446	3552.781	2143	4069	292913.995	35527809
	5	82.446	3365.836	2309	4128	277501.045	33658358
	6	82.446	3633.392	3039	4637	299560.115	36333923
Exp 7040 droite	7	82.446	3557.165	2845	5055	293275.473	35571653
	8	82.446	3457.082	2810	4304	285023.974	34570821
	9	82.446	2699.967	1919	3356	222602.535	26999667
Exp 7041 haut	10	82.446	2584.714	1726	3162	213100.364	25847140
	11	82.446	3075.895	2284	3984	253596.445	30758947
	12	82.446	2315.018	916	3631	190864.900	23150180
Exp 7041 3ème embryons	13	82.446	2763.681	1019	5885	227855.557	27636811.000
	14	82.446	3282.113	2068	6939	270598.434	32821134.000
	15	82.446	3013.919	2173	5080	248486.738	30139186.000
Exp 7042 haut gauche	1	82.446	3090.760	2211	3960	254822.068	30907604
	2	82.446	3429.434	2844	4117	282744.512	34294343
	3	82.446	3370.666	2727	4148	277899.302	33706663
Exp 7042 haut droite	4	82.446	3610.108	2384	4486	297640.400	36101079
	5	82.446	4012.364	3471	4757	330804.984	40123642
	6	82.446	3100.032	1483	4224	255586.511	31000324
Exp 7042 bas gauche	7	82.446	3049.295	1442	4098	251403.420	30492953.000
	8	82.446	3210.446	2080	3944	264689.707	32104459.000
	9	82.446	2786.089	1772	3630	229703.041	27860894.000
lgg-1(G116AG117*)	12	82.446	2903.892	1951	4255	239415.417	29038917.000
	13	82.446	2689.450	2238	3113	221735.446	26894497.000
	14	82.446	3031.549	2340	3622	249940.318	30315492.000
Exp6969	16	82.446	3103.420	2673	3593	255865.831	31034203.000
	17	82.446	3045.841	2511	3437	251118.617	30458409.000
	18	82.446	2883.945	1451	3537	237770.858	28839447.000
Exp7024	34	82.446	2272.738	1771	2568	187379.099	22727384.000
	35	82.446	2359.956	2125	2566	194569.876	23599560.000
	36	82.446	1898.989	1313	2254	156564.840	18989894.000
