# Supplementary material for: LGG-1/GABARAP lipidation is not required for autophagy and development in Caenorhabditis elegans
Source: eLife journal article supplement (doi:10.7554/elife.85748), 2023-07-03
Supplement: supp [file longevit 1 .xlsx]

## Sheet: Feuil4
wt	J0-06-08	J1- 07-08	J2-08-08	J-3 09/08	J-4 10/08	J-5 11/08	J7-13/08	J8-14/08	J9-15/08	J10-16/08	J11-17/08	J13-19/08	J14-20/08	J15-21/08	J-16-22/08	J-17-23/08	J-18-24/08	J-19-25/08	J-20-26/08	J-21-27/08	J-22-28/08	J-23-29/08	J-24-30/08	J-25-31/08	J26-01/09	J-27-02/09
b1	20	18	18	18	18	17	15	15	15	15	14	14	12	12	12	11	11	11	8	5	3	3	2	0	0	0									N2	lgg-1(tm3489)
b2	20	20	19	19	19	19	18	18	17	16	16	15	15	14	14	14	12	10	8	6	2	2	3	2	1	0								J0	1	1
b3	20	20	20	20	20	20	19	19	19	18	17	17	16	16	15	14	13	11	9	6	3	3	2	2	2	2								J1	1	1
b4	20	20	20	20	20	19	18	17	17	16	16	15	15	14	14	14	14	13	11	11	9	5	3	2	2	2								J2	1	0.9908
b5	20	20	20	19	19	18	16	16	15	15	15	14	14	13	13	13	13	10	10	9	4	2	2	1	1	0								J3	1	0.9906
b6	20	18	17	17	17	17	17	16	16	16	14	13	13	12	11	11	11	11	11	10	7	3	0	0	0	0								J4	1	0.9906
n	120	116	114	113	113	110	103	101	99	96	92	88	85	81	79	77	74	66	57	47	28	18	12	7	6	4								J5	0.9821	0.9524
nb mort /par J	0	0	0	0	0	2	1	0	0	0	3	1	2	1	1	2	3	8	9	10	18	11	5	5	1	2								J7	0.9717	0.9118
nb de mort add	0	0	0	0	0	2	3	3	3	3	6	7	9	10	11	13	16	24	33	43	61	72	77	82	83	85								J8	0.9711	0.8713
nb d'evenment 0	0	4	2	1	0	1	6	2	2	3	1	3	1	4	1	0	0	0	0	0	0	0	0	0	0	0								J9	0.9706	0.7879
nb evenement 0 add	0	4	6	7	7	8	14	16	18	21	22	25	26	30	31	31	31	31	31	31	31	31	31	31	31	31								J10	0.9697	0.6495
% de survie																																		J11	0.9388	0.4742
% de survie	100	100	100	100	100	98.2143	97.1698	97.1154	97.0588	96.9697	93.8776	92.6316	90.4255	90	88.764	86.5169	83.1461	74.1573	64.0449	52.809	31.4607	20.2247	13.4831	7.86517	6.74157	4.49438								J13	0.9263	0.2783
Jour	0	1	2	3	4	5	7	8	9	10	11	13	14	15	16	17	18	19	20	21	22	23	24	25	26	27								J14	0.9042	0.0928
tableau																																		J15	0.9	0.0206
																																		J16	0.8427	0
lgg-1(tm3489)	J0-06-08	J1- 07-08	J2-08-08	J-3 09/08	J-4 10/08	J-5 11/08	J7-13/08	J8-14/08	J9-15/08	J10-16/08	J11-17/08	J13-19/08	J14-20/08	J15-21/08	J-16-22/08																			J17	0.8202	0
b1	20	19	18	18	18	17	15	15	13	10	6	3	0	0	0																			J18	0.764	0
b2	20	20	19	19	19	18	17	14	10	7	5	4	0	0	0																			J19	0.6629	0
b3	20	18	18	16	16	16	16	15	13	11	8	3	1	0	0																			J20	0.5843	0
b4	20	17	17	17	17	15	14	14	14	10	6	5	2	1	0																			J21	0.4719	0
b5	20	20	18	18	18	17	15	15	13	11	9	5	1	0	0																			J22	0.3034	0
b6	20	19	18	17	17	17	16	15	15	14	12	7	5	1	0																			J23	0.191	0
n	120	113	108	105	105	100	93	88	78	63	46	27	9	2	0																			J24	0.0899	0
nb mort /par J	0	0	1	0	0	2	4	4	8	15	17	19	14	7	2																			J25	0.078	0
nb de mort add	0	0	1	1	1	3	7	11	19	34	51	70	84	91	93
nb d'evenment 0	0	7	4	3	0	1	3	1	2	2	0	0		0	0
nb evenement 0 add	0	7	11	14	14	15	18	19	21	23	23	23	23	23	23
% de survie	1	100	99.0826	99.0566	99.0566	95.2381	91.1765	87.1287	78.7879	64.9485	47.4227	27.8351	9.27835	2.06186	0
tableau		0	0	0
lgg-1(GA)	J0-06-08	J1- 07-08	J2-08-08	J-3 09/08	J-4 10/08	J-5 11/08	J7-13/08	J8-14/08	J9-15/08	J10-16/08	J11-17/08	J13-19/08	J14-20/08	J15-21/08	J-16-22/08	J-17-23/08	J-18-24/08	J-19-25/08	J-20-26/08	J-21-27/08	J-22-28/08	J-23-29/08	J-24-30/08	J-25-31/08	J26-01/09
b1	20	19	18	18	18	18	16	15	15	14	13	10	10	10	10	10	10	8	7	6	3	2	0	0	0
b2	20	20	19	18	18	17	16	16	16	16	15	15	14	12	12	11	11	9	9	5	2	2	2	1	0
b3	20	20	18	18	18	18	16	16	16	16	15	15	15	13	13	13	13	10	8	7	5	3	1	1	0
b4	20	20	20	19	18	17	16	16	16	16	16	15	15	15	15	15	13	12	9	5	2	2	1	2	0
b5	20	20	18	17	17	17	17	17	17	17	17	17	16	12	12	12	11	11	9	6	2	0	0	0	0
b6	20	19	19	19	18	18	18	17	16	16	16	16	16	16	15	13	12	11	10	8	3	0	0	0	0
n	120	118	112	109	107	105	99	97	96	95	92	88	86	78	77	74	70	61	52	37	17	9	4	4	0
nb mort /par J	0	0	0	0	1	1	2	0	1	0	2	3	2	4	1	1	4	7	9	15	20	8	4	2	4
nb de mort add	0	0	0	0	1	2	4	4	5	5	7	10	12	16	17	18	22	29	38	53	73	81	85	87	91
nb d'evenment 0	0	2	6	3	1	1	4	2	2	1	1	1	0	3	0	2	0	0	0	0	0	0	0	0	0
nb evenement 0 add	0	2	8	11	12	13	17	19	21	22	23	24	24	27	27	29	29	29	29	29	29	29	29	29	29
% de survie	1	1	100	100	99.0741	98.1308	96.1165	96.0396	96.9697	96.9388	94.8454	91.6667	89.5833	83.871	82.7957	81.3187	76.9231	67.033	57.1429	40.6593	18.6813	9.89011	4.3956	4.3956	0
tableau		0	0	0
lgg-2(tm5755)	J0-06-08	J1- 07-08	J2-08-08	J-3 09/08	J-4 10/08	J-5 11/08	J7-13/08	J8-14/08	J9-15/08	J10-16/08	J11-17/08	J13-19/08	J14-20/08	J15-21/08	J-16-22/08	J-17-23/08	J-18-24/08	J-19-25/08	J-20-26/08	J-21-27/08	J-22-28/08	J-23-29/08	J-24-30/08	J-25-31/08	J26-01/09
b1	20	19	18	16	13	13	13	13	13	13	13	13	13	11	11	10	10	10	10	5	2	0	0	0	0
b2	20	20	18	18	18	15	13	13	13	13	12	12	12	12	12	12	10	9	5	3	2	0	0	0	0
b3	20	20	18	18	18	18	16	16	15	15	14	13	11	11	11	11	9	7	5	5	2	1	0	0	0
b4	20	20	18	17	15	15	15	15	15	15	15	15	15	13	13	12	10	9	9	7	2	1	1	1	0
b5	20	19	18	18	17	17	17	16	15	14	14	13	13	13	12	12	11	11	10	8	3	3	2	0	0
b6	20	19	19	17	17	17	15	14	14	14	14	14	14	11	11	11	11	10	8	6	4	2	1	0	0
n	120	117	109	104	98	95	89	87	85	84	82	80	78	71	70	68	61	56	47	34	15	7	4	1	0
nb mort /par J	0	0	0	0	0	1	1	0	1	0	0	1	2	4	1	0	7	4	9	13	24	8	4	1	4
nb de mort add	0	0	0	0	0	1	2	2	3	3	3	4	6	10	11	11	18	22	31	44	68	76	80	81	85
nb d'evenment 0	0	3	8	5	6	0	4	2	1	1	2	1	0	3	0	2	0	1	0	0	0	0	0	0	0
nb evenement 0 add	0	3	11	16	22	22	26	28	29	30	32	33	33	36	36	38	38	39	39	39	39	39	39	39	39
% de survie	1	1	100	100	100	96.9388	94.6809	94.5652	93.4066	93.3333	93.1818	91.954	89.6552	84.5238	83.3333	82.9268	74.3902	69.1358	58.0247	41.9753	18.5185	8.64198	4.93827	1.23457	0
lgg-1(GA);lgg-2(tm5755)	J0-06-08	J1- 07-08	J2-08-08	J-3 09/08	J-4 10/08	J-5 11/08	J7-13/08	J8-14/08	J9-15/08	J10-16/08	J11-17/08	J13-19/08	J14-20/08	J15-21/08	J-16-22/08	J-17-23/08	J-18-24/08	J-19-25/08
b1	20	19	17	15	15	14	14	13	13	10	6	4	4	2	1	0	0	0
b2	20	18	17	16	16	16	15	15	10	10	5	3	1	1	0	0	0	0
b3	20	18	18	16	16	16	15	15	13	9	8	4	4	2	2	0	0	0
b4	20	17	17	16	16	14	14	14	14	10	6	2	2	1	1	0	0	0
b5	20	19	18	18	17	16	16	14	13	11	9	5	1	1	1	1	1	0
b6	20	19	19	18	17	17	17	17	15	10	12	8	4	2	2	2	1	0
n	120	110	106	99	97	93	91	88	78	60	46	26	16	9	7	3	2	0
nb mort /par J	0	0	1	1	0	0	1	2	8	15	14	15	10	7	2	4	1	2
nb de mort add	0	0	1	2	2	2	3	5	13	28	42	57	67	74	76	80	81	83
nb d'evenment 0	0	10	3	6	2	4	2	1	2	2	0	5	0	0	0	0	0	0
nb evenement 0 add	0	10	13	19	21	25	27	28	30	32	32	37	37	37	37	37	37	37
% de survie	1	100	99.0654	98.0198	97.9798	97.8947	97.8495	95.6522	86.6667	68.1818	52.2727	31.3253	19.2771	10.8434	8.43373	3.61446	2.40964	0
	0	1	2	3	4	5	7	8	9	10	11	13	14	15	16	17	18	19	20	21	22	23	24	25	26	27	28
N2	100	100	100	100	100	98.2143	97.1698	97.1154	97.0588	96.9697	93.8776	92.6316	90.4255	90	88.764	86.5169	83.1461	74.1573	64.0449	52.809	31.4607	20.2247	13.4831	7.86517	6.74157	4.49438	0
lgg-1(tm3489)	100	100	99.0826	99.0566	99.0566	95.2381	91.1765	87.1287	78.7879	64.9485	47.4227	27.8351	9.27835	2.06186	0	0	0	0	0	0	0	0	0	0	0	0	0
lgg-1(GA)	100	100	100	100	99.0741	98.1308	96.1165	96.0396	96.9697	96.9388	94.8454	91.6667	89.5833	83.871	82.7957	81.3187	76.9231	67.033	57.1429	40.6593	18.6813	9.89011	4.3956	4.3956	0	0	0
lgg-2(tm5755)	100	100	100	100	100	96.9388	94.6809	94.5652	93.4066	93.3333	93.1818	91.954	89.6552	84.5238	83.3333	82.9268	74.3902	69.1358	58.0247	41.9753	18.5185	8.64198	4.93827	1.23457	0	0	0
lgg-1(GA):lgg-2(tm5755)	100	100	99.0654	98.0198	97.9798	97.8947	97.8495	95.6522	86.6667	68.1818	52.2727	31.3253	19.2771	10.8434	8.43373	3.61446	2.40964	0	0	0	0	0	0	0	0	0	0
