# Supplementary material for: LGG-1/GABARAP lipidation is not required for autophagy and development in Caenorhabditis elegans
Source: eLife journal article supplement (doi:10.7554/elife.85748), 2023-07-03
Supplement: supp [file ltalits mutants lgg-1 CRISPR .xlsx]

## Sheet: Feuil1
% de létalité - MANIP NOV 2017
	ponte 1h- 20 Adultes	nbr embryon après 24 h	nbr d' adultes	mortalité %	viabilité
N2	102	1	100	0.02	0.98		calculette	78	100
pp65	98	3	95	0.03	0.97			2	2.5641
pp22	53	39	3	0.944	0.056
pp66	78	62	2	0.974	0.026
% de létalité embryonnaire - MANIP mars 2019
	ponte 1h- 20 Adultes	nbr embryon après 24 h	nbr d' adultes	mortalité %	viabilité %		calculette	80	100
N2	82	0	82	0	1			79	98.75
pp65	80	1	79	0.0125	0.9875
pp22	68	41	4	0.9412	0.0588
pp66	53	39	3	0.9434	0.0567
pp141	74	2	72	0.027	0.9729
lgg-1(tm3489)	43	57	5	0.8838	0.1162
% de létalité embryonnaire - septembre 2019
	ponte 1h- 20 Adultes	nbr embryon après 24 h	nbr d' adultes	mortalité %	viabilité %		calculette	97	100
N2	98		98		1			95	97.9381
pp65	100		98		0.98
pp141 gastop	97		95		0.979381		calculette	57	100
lgg-1(tm3489)	65		7		0.1076			5	8.77193
pp142 gaga	53		2		0.0377
% de létalité embryonnaire - semptembre 2020
	ponte 1h- 20 Adultes	nbr embryon après 24 h	nbr d' adultes	mortalité %	viabilité %
N2	95	2	93	0	0.9789
pp65	98	1	98	0.0125	0.9875
pp141 gastop	94	4	92	0.027	0.97872
lgg-1(tm3489)	78	54	8	0.8838	0.1025				moyennne GAGA	55.3	2.3	0.0342	0.9658
pp142 gaga	68	38	4	0.9622	0.0588
pp22	61	51	4	0.9412	0.0655
pp66	57	41	5	0.9434	0.0877
% de létalité embryonnaire - semptembre 2020								calculette	88	100
									4	4.54545
	ponte 1h- 20 Adultes	nbr embryon après 24 h	nbr d' adultes	mortalité %	viabilité %
N2	88	0	87	0	0.9886
pp142 gaga	74	38	4	0.0454	0.0588
moyenne	viabilité %
N2	0.989725
pp65	0.98125
pp141 gastop	0.977
lgg-1(tm3489)	0.108767
pp142 gaga	0.0517667
pp22	0.0601
pp66	0.0568
