# Supplementary material for: LGG-1/GABARAP lipidation is not required for autophagy and development in Caenorhabditis elegans
Source: eLife journal article supplement (doi:10.7554/elife.85748), 2023-07-03
Supplement: supp [file mitotracker bilan .xlsx]

## Sheet: Feuil1
	1C-4C	6C-15C	20C-50C	70C
N2	0.715	0.555	0.1	0
lgg-1(tm3489)	1	1	0.946	0.6
lgg-1(G116AG117STOP)	1	0.81	0.77	0.615
lgg-1(G116A)	0.8	1	0.233	0
Spe-11::hsp6::GFP x N2/pp141/pp65/tm
observation en hétéro
