# Supplementary material for: LGG-1/GABARAP lipidation is not required for autophagy and development in Caenorhabditis elegans
Source: eLife journal article supplement (doi:10.7554/elife.85748), 2023-07-03
Supplement: supp [file quantif 2022 + 28122021 tableau quantif doubles mutants.xlsx]

## Sheet: lgg-2
animal	niveaux d'observation	stade	vésicules
			autophagosomes avec cytoplasme dedans	autophagosomes avec structure dedans	vésicule multi membranaire avec structures à l'interieur	"ensemble" vésicule multi membranaire avec structures à l'interieur	vésicule X	MP libre	MP partiellement dans vésicule	MP dans vésicule
2	4	8					1
		3
		1		1
		2	1
		1
2	2	1					1
	5	2					1
		4
		1
		10
		4					1
		2		1
		2
		1
		1
2	6	2					1
2	7	2					1
		1
		2	1
		10					1
		2
		1
2	8	1
		3
1	1	1
2	8	5		1	1	1	1
		10
		10					3
		3
		2	1		2
		1					1
		2
		2
		3					1
		10
		3
		1
2	6	1					1
		2
		7
		10					1
		5					1
		2					4
		2					1
		1
1	2	1	1
		2					3
		2					2
	3	2
		3					5
		5		1			2
		5
2 animaux	animal 1:6 niveaux; animal 2: 3 niveaux	40 coupes stade 1 à 4 cellules et 12 coupes stade 5 à 10 cellules	4	4	3	1	33	0	0	0
animal	niveaux d'observation	stade	autophagosomes avec cytoplasme dedans	autophagosomes avec structure dedans	vésicule multi membranaire avec structures à l'interieur	"ensemble" vésicule multi membranaire avec structures à l'interieur	vésicule X	MP libre	MP partiellement dans vésicule	MP dans vésicule
			vésicules
		3
		1		1
		2	1
		1
		1					1
		2					1
		4
		1
		4					1
		2		1
		2
		1
		1
		2					1
		2					1
		1
		2	1
		2
		1
		1
		3
		1
		3
		2	1		2
		1					1
		2
		2
		3					1
		3
		1
		1					1
		2
		2					4
		2					1
		1
		1	1
		2					3
		2					2
		2
		3					5
		somme	4	2	2	0	23	0	0	0
		8					1
		10
		10					1
		5		1	1	1	1
		10
		10					3
		10
		7
		10					1
		5					1
		5		1			2
		5
		somme	0	2	1	1	10	0	0	0

## Sheet: lgg-2XGA
animal	niveaux d'observation	stade	vésicules
			autophagosomes avec cytoplasme dedans	autophagosomes avec structure dedans	vésicule multi membranaire avec structures à l'interieur	"ensemble" vésicule multi membranaire avec structures à l'interieur	vésicule X	MP libres	MP partiellement dans vésicule	MP dans vésicule
1	2	1
		2
		1						1
		4						4
		3
		8
		7
		4
		1
		1
2	2	1						3
		1			1
		2				1				1
		2				1				1
		2		1
		6
		5
		10
		2
		1
1	4	10			1
		5
		1						1	2	1
1	3	2				1				1
		1						1		1
1	4	5	1
1	1	1				1		1		5
		1
3	1	1
		2
		2						2
1	1	1
1	2	7				1				1
		1
3 animaux	animal 1:4 niveaux; animal 2: 1 niveau; animal 3: 1 niveau	25 coupes stade 1 à 4 cellules et 9 coupes stade 5 à 10 cellules	1	1	2	5	0	13	2	11
animal	niveaux d'observation	stade	autophagosomes avec cytoplasme dedans	autophagosomes avec structure dedans	vésicule multi membranaire avec structures à l'interieur	"ensemble" vésicule multi membranaire avec structures à l'interieur	vésicule X	MP libre	MP partiellement dans vésicule	MP dans vésicule
			vésicules
		1
		2
		1						1
		4						4
		3
		4
		1
		1
		1						3
		1			1
		2				1				1
		2				1				1
		2		1
		2
		1
		1						1	2	1
		2				1				1
		1						1		1
		1				1		1		5
		1
		1
		2
		2						2
		1
		1
		somme	0	1	1	4	0	13	2	10
		8
		7
		6
		5
		10
		10			1
		5
		5	1
		7				1				1
		somme	1	0	1	1	0	0	0	1

## Sheet: bilan 1
animal	niveaux d'observation	stade		vésicules
			mutant	autophagosomes avec cytoplasme dedans	autophagosomes avec structure dedans	vésicule multi membranaire avec structures à l'interieur	"ensemble" vésicule multi membranaire avec structures à l'interieur	vésicule X	MP libre	MP partiellement dans vésicule	MP dans vésicule
2 animaux	animal 1:6 niveaux; animal 2: 3 niveaux	40 coupes stade 1 à 4 cellules et 12 coupes stade 5 à 10 cellules	lgg-2(tm5755)	4	4	3	1	33	0	0	0
3 animaux	animal 1:4 niveaux; animal 2: 1 niveau; animal 3: 1 niveau	25 coupes stade 1 à 4 cellules et 9 coupes stade 5 à 10 cellules	lgg-2(tm5755) X lgg-1(GA)	1	1	2	5	0	13	2	11
				vésicules/coupe d'embryon
			mutant	autophagosomes avec cytoplasme dedans	autophagosomes avec structure dedans	vésicule multi membranaire avec structures à l'interieur	"ensemble" vésicule multi membranaire avec structures à l'interieur	vésicule X	MP libre	MP partiellement dans vésicule	MP dans vésicule
			lgg-2(tm5755)	0.1	0.1	0.075	0.025	0.825	0	0	0
			lgg-2(tm5755) X lgg-1(GA)	0.04	0.04	0.08	0.2	0	0.52	0.08	0.44

## Sheet: bilan 2
		vésicules								surface			vésicules/µm2
mutant	stade	autophagosomes avec cytoplasme dedans	autophagosomes avec structure dedans	vésicule multi membranaire avec structures à l'interieur	"ensemble" vésicule multi membranaire avec structures à l'interieur	vésicule X	MP libre	MP partiellement dans vésicule	MP dans vésicule	nombre de coupes par stade	surface d'une coupe(µm2)	surface totale (µm2)	autophagosomes avec cytoplasme dedans	autophagosomes avec structure dedans	vésicule multi membranaire avec structures à l'interieur	"ensemble" vésicule multi membranaire avec structures à l'interieur	vésicule X	MP libre	MP partiellement dans vésicule	MP dans vésicule
lgg-2	1 à 4 cellules	4	2	2	0	23	0	0	0	40	650	26000	0.000153846	7.69231e-05	7.69231e-05	0	0.000884615	0	0	0
	5 à 10 cellules	0	2	1	1	10	0	0	0	12	915	10980	0	0.000182149	9.10747e-05	9.10747e-05	0.000910747	0	0	0
lgg-2XGA	1 à 4 cellules	0	1	1	4	0	13	2	10	25	650	16250	0	6.15385e-05	6.15385e-05	0.000246154	0	0.0008	0.000123077	0.000615385
	5 à 10 cellules	1	0	1	1	0	0	0	1	9	915	8235	0.000121433	0	0.000121433	0.000121433	0	0	0	0.000121433
		vésicules/µm2
mutant	stade	autophagosomes avec cytoplasme dedans	autophagosomes avec structure dedans	vésicule multi membranaire avec structures à l'interieur	"ensemble" vésicule multi membranaire avec structures à l'interieur	vésicule X	MP libre	MP partiellement dans vésicule	MP dans vésicule
lgg-2	1 à 4 cellules	0.000153846	7.69231e-05	7.69231e-05	0	0.000884615	0	0	0
	5 à 10 cellules	0	0.000182149	9.10747e-05	9.10747e-05	0.000910747	0	0	0				MP libre	MP partiellement dans vésicule	MP dans vésicule
lgg-2XGA	1 à 4 cellules	0	6.15385e-05	6.15385e-05	0.000246154	0	0.0008	0.000123077	0.000615385			1 à 4 cellules	0.0008	0.000123077	0.000615385
	5 à 10 cellules	0.000121433	0	0.000121433	0.000121433	0	0	0	0.000121433			5 à 10 cellules	0	0	0.000121433

## Sheet: bilan 3
	Vésicules			ensemble de vésicules			nombre de coupes par stade	surface moyenne d'une coupe(µm2)	surface totale (µm2)	Vésicules			ensemble
	type 1	type 2	type 3	type 1	type 2	type 3				type 1	type 2	type 3	type 1	type 2	type 3	/µm2
lgg-2	2	5	0	0	3	0	52	661	34372	5.81869e-05	0.000145467	0	0	8.72803e-05	0
lgg-2XGA	4	1	0	10	13	0	34	661	22474	0.000177983	4.44959e-05	0	0.000444959	0.000578446	0
lgg-2XGAstop	1	1	2	0	0	0	26	661	17186	5.81869e-05	5.81869e-05	0.000116374	0	0	0
