# Supplementary material for: LGG-1/GABARAP lipidation is not required for autophagy and development in Caenorhabditis elegans
Source: eLife journal article supplement (doi:10.7554/elife.85748), 2023-07-03
Supplement: supp [file quantif lgg1gfp.xlsx]

## Sheet: Feuil1
			1	2	3	4	5	6	7	8	9	10	moyenne	écart type					1	2	3	4	5	6	7	8	9	10	moyenne	écart type
Da2123	l4440	20	3	10	9	25	16	9	25	17	19	9	14.2	7.39068		Da2123	l4440	20	3.44432	11.4811	1.02529	4.07365	3.67985	1.05275	3.89772	2.77099	4.00337	1.10105	3.65301	3.0302
	surface		871	871	8778	6137	4348	8549	6414	6135	4746	8174	5502.3	2859.43
		37	35	21	20	29	49	54	59	49	74	48	43.8	17.3256				37	40.1837	24.1102	22.9621	33.2951	19.4754	17.0994	15.3127	14.7635	17.7543	15.4889	22.0445	8.50804
	surface		871	871	871	871	2516	3158	3853	3319	4168	3099	2359.7	1353.73
	epg-5	20	29	32	13	23	40	16	31	40	42	73	33.9	16.9342			epg-5	20	33.2951	36.7394	14.9254	26.4064	45.9242	18.3697	30.7845	14.1044	13.5878	19.1601	25.3297	11.0921
	surface		871	871	871	871	871	871	1007	2836	3091	3810	1597	1163.09
		37	52	22	50	58	65	54	52	46	63	49	51.1	11.8832				37	59.7015	25.2583	57.4053	32.8798	22.1995	20.8253	28.8568	15.8621	35.6941	17.2474	31.593	15.5631
	surface		871	871	871	1764	2928	2593	1802	2900	1765	2841	1920.6	859.012
	rab-7	20	47	45	30	65	26	26	40	75	38	44	43.6	16.0083			rab-7	20	53.961	51.6648	34.4432	23.766	11.2214	13.5912	10.7614	20.1613	11.6386	9.69163	24.09	16.9679
	surface		871	871	871	2735	2317	1913	3717	3720	3265	4540	2482	1337.8
		37	51	95	51	33	41	55	51	64	86	53	58	19.1021				37	58.5534	109.07	58.5534	27.8246	25.1843	20.9444	18.1624	17.5055	35.3764	16.8897	38.8064	29.2766
	surface		871	871	871	1186	1628	2626	2808	3656	2431	3138	2008.6	1048.39
	atg-3	20	4	4	3	9	1	4	5	14	2	1	4.7	4.00139			atg-3	20	4.59242	4.59242	3.44432	3.56295	0.514933	1.40203	0.969368	2.93932	0.452899	0.26441	2.27351	1.73639
	surface		871	871	871	2526	1942	2853	5158	4763	4416	3782	2805.3	1665.54
		37	22	4	20	10	20	6	8	5	21	32	14.8	9.42573				37	25.2583	4.59242	22.9621	3.4459	9.35016	2.49377	1.41118	1.08767	6.19104	11.0765	8.78691	8.71745
	surface		871	871	871	2902	2139	2406	5669	4597	3392	2889	2660.7	1612.12
	atg-7	20	9	1	0	3	2	0	3	1	0	2	2.1	2.68535			atg-7	20	10.333	1.14811	0	3.44432	0.879507	0	0.695249	0.252717	0	0.430108	1.7183	3.19603
	surface		871	871	871	871	2274	1804	4315	3957	2942	4650	2342.6	1532.51
		37	22	15	10	16	20	13	24	24	33	39	21.6	9.00864				37	25.2583	17.2216	11.4811	18.3697	22.9621	7.72889	7.6118	9.76801	9.30364	9.5941	13.9299	6.51794
	surface		871	871	871	871	871	1682	3153	2457	3547	4065	1925.9	1274.32
RD202	l4440	20	0	0	0	0	0	0					0	0		RD202	l4440	20	0	0	0	0	0	0	#DIV/0!	#DIV/0!	#DIV/0!	#DIV/0!	0	0
	surface		871	871	871	2561	3470	2633					1879.5	1150.05
		37	0	1	0	0	0	0	0				0.142857	0.377964				37	0	1.14811	0	0	0	0	0	#DIV/0!	#DIV/0!	#DIV/0!	0.164015	0.433943
	surface		871	871	871	871	2091	1920	4411				1700.86	1310.2
	epg-5	20	0	0	0	0							0	0			epg-5	20	0	0	0	0	#DIV/0!	#DIV/0!	#DIV/0!	#DIV/0!	#DIV/0!	#DIV/0!	0	0
	surface		871	4617	4532	3593							3403.25	1750.77
		37	1	0	0	0	0	0					0.166667	0.408248				37	1.14811	0	0	0	0	0	#DIV/0!	#DIV/0!	#DIV/0!	#DIV/0!	0.191351	0.468712
	surface		871	871	871	3818	4089	4483					2500.5	1797.51
	rab-7	20	0	1	0	0	0						0.2	0.447214			rab-7	20	0	1.14811	0	0	0	#DIV/0!	#DIV/0!	#DIV/0!	#DIV/0!	#DIV/0!	0.229621	0.513448
	surface		871	871	5090	4422	4328						3116.4	2070.71
		37	0	0	1	0	0	0					0.166667	0.408248				37	0	0	1.14811	0	0	0	#DIV/0!	#DIV/0!	#DIV/0!	#DIV/0!	0.191351	0.468712
	surface		871	871	871	2421	4298	4809					2356.83	1811.54
	atg-3	20	0	0	0	0							0	0			atg-3	20	0	0	0	0	#DIV/0!	#DIV/0!	#DIV/0!	#DIV/0!	#DIV/0!	#DIV/0!	0	0
	surface		871	3484	3543	5283							3295.25	1818.9
		37	0	1	0	0	0	0	0	0			0.125	0.353553				37	0	1.14811	0	0	0	0	0	0	#DIV/0!	#DIV/0!	0.143513	0.405917
	surface		871	871	3829	4275	5468	3319	2971	3675			3159.88	1595.66
	atg-7	20	0	0	0	0	0	0	0				0	0			atg-7	20	0	0	0	0	0	0	0	#DIV/0!	#DIV/0!	#DIV/0!	0	0
	surface		871	5405	6576	5705	4292	4255	2238				4191.71	2012.67
		37	0	0	1	0	0	0	0	0	0	0	0.1	0.316228				37	0	0	1.14811	0	0	0	0	0	0	0	0.114811	0.363063
	surface		871	871	871	2545	4985	4745	4747	5883	3474	5673	3466.5	2037.08
			moyenne	écart type
l4440	Da2123	20	3.65301	3.0302
		37	22.0445	8.50804
	RD202	20	0	0
		37	0.164015	0.433943
epg-5	Da2123	20	25.3297	11.0921
		37	31.593	15.5631
	RD202	20	0	0
		37	0.191351	0.468712
rab-7	Da2123	20	24.09	16.9679
		37	38.8064	29.2766
	RD202	20	0.229621	0.513448
		37	0.191351	0.468712
atg-3	Da2123	20	2.27351	1.73639
		37	8.78691	8.71745
	RD202	20	0	0
		37	0.143513	0.405917
atg-7	Da2123	20	1.7183	3.19603
		37	13.9299	6.51794
	RD202	20	0	0
		37	0.114811	0.363063
