# Supplementary material for: LGG-1/GABARAP lipidation is not required for autophagy and development in Caenorhabditis elegans
Source: eLife journal article supplement (doi:10.7554/elife.85748), 2023-07-03
Supplement: supp [file quantifications immuno-EM 2023.xlsx]

## Sheet: avril mai 2023
	nombre autophagosomes	nombre autophagosomes marqués	% autophagosomes marqués
Da2123	110	38	34.5455
RD202	116	11	9.48276
	% autophagosomes marqués
Da2123	34.5455
RD202	9.48276
	nombre autophagosomes marqués	nombre autophagosomes marqués à la membrane	% autophagosomes marqués à la membrane de l'autophagosome
Da2123	38	26	68.4211
RD202	11	5	45.4545
	nombre autophagosomes marqués	nombre autophagosomes marqués à l'intérieur	% autophagosomes marqués à l'interieur de l'autophagosome
Da2123	38	7	18.4211
RD202	11	5	45.4545
	nombre autophagosomes marqués	nombre autophagosomes marqués à la membrane et à l'intérieur	% autophagosomes marqués à la membrane et à l'interieur de l'autophagosome
Da2123	38	5	13.1579
RD202	11	1	9.09091
	% autophagosomes marqués à la membrane de l'autophagosome	% autophagosomes marqués à l'interieur de l'autophagosome	% autophagosomes marqués à l'interieur de l'autophagosome
Da2123	68.4211	18.4211	13.1579
RD202	45.4545	45.4545	9.09091
	nombre de billes à la membrane de l'autophagosome
autophagosomes marqués à la membrane	Da2123	RD202
1	1	3
2	1	1
3	2	1
4	2	1
5	1	1
6	4
7	1
8	2
9	3
10	1
11	1
12	1
13	6
14	2
15	1
16	1
17	4
18	3
19	3
20	1
21	1
22	1
23	1
24	1
25	2
26	2
moyenne	1.88462	1.4
écart type	1.27521	0.894427
	Da2123	RD202
moyenne nombre de billes à la membrane de l'autophagosome	1.88462	1.4
écart type	1.27521	0.894427
	nombre autophagosomes	nombre autophagosomes marqués à la membrane	% autophagosomes marqués à la membrane de l'autophagosome
Da2123	110	26	23.6364
RD202	116	5	4.31034
	% autophagosomes marqués	% autophagosomes marqués à la membrane de l'autophagosome
Da2123	34.5455	23.6364
RD202	9.48276	4.31034
	% autophagosomes marqués à la membrane de l'autophagosome
Da2123	23.6364
RD202	4.31034
	nombre de billes à l'interieur
autophagosomes marqués à l'interieur	Da2123	RD202
1	1	6
2	2	1
3	1	1
4	1	2
5	5	1
6	4
7	1
moyenne	2.14286	2.2
écart type	1.67616	2.16795
