# Supplementary material for: LGG-1/GABARAP lipidation is not required for autophagy and development in Caenorhabditis elegans
Source: eLife journal article supplement (doi:10.7554/elife.85748), 2023-07-03
Supplement: supp [file table 2 ltalit lgg-2(tm5755);lgg-1(g116a).xlsx]

## Sheet: Feuil1
	N2	lgg-1(tm3489)	lgg-1(pp65)	lgg-2(tm5755)	lgg-1(pp65) ; lgg-2(tm5755)
	0.98	0.09	0.97	0.97	0.96
