# Supplementary material for: LGG-1/GABARAP lipidation is not required for autophagy and development in Caenorhabditis elegans
Source: eLife journal article supplement (doi:10.7554/elife.85748), 2023-07-03
Supplement: supp [file tableau quantif doubles mutants.xlsx]

## Sheet: bilan 3
	Vésicules			ensemble			nombre de coupes d'embryon	surface moyenne d'une coupe(µm2)	surface totale (µm2)	Vésicules			ensemble						Vésicules			ensemble		/1000 µm2
	type 1	type 2	type 3	type 1	type 2	type 3				type 1	type 2	type 3	type 1	type 2	type 3	/µm2			type 1	type 2	type 3	type 1	type 2	type 3	somme type1	somme type2	somme type3
lgg-2	2	5	0	0	3	0	52	661	34372	5.81869e-05	0.000145467	0	0	8.72803e-05	0			lgg-2	0.0581869	0.145467	0	0	0.0872803	0	0.0581869	0.232748	0
lgg-2XGA	4	1	0	10	13	0	34	661	22474	0.000177983	4.44959e-05	0	0.000444959	0.000578446	0			lgg-2XGA	0.177983	0.0444959	0	0.444959	0.578446	0	0.622942	0.622942	0
lgg-2XGAstop	1	1	2	0	0	0	26	661	17186	5.81869e-05	5.81869e-05	0.000116374	0	0	0			lgg-2XGAstop	0.0581869	0.0581869	0.116374	0	0	0	0.0581869	0.0581869	0.116374
souches	nombre d'animaux	nombre de niveaux observés	nombre de coupes d'embryons
lgg-2	2 animaux	animal 1:6 niveaux; animal 2: 3 niveaux	52 coupes
lgg-2XGA	3 animaux	animal 1:4 niveaux; animal 2: 1 niveau; animal 3: 1 niveau	34 coupes
lgg-2XGAstop	3 animaux	animaux: 12 niveaux	26 coupes
questions RL 1/04	nombre d'embryons et stade ?	surface moyenne utilisée? Des mesures de surface réelle?

## Sheet: Feuil1
		1-4 cells	5-10 cells	somme	moyenne
	wt-type1	0.627119	0.10929	0.736408	0.368204
	wt-type2	0	0.10929	0.10929	0.0546448
	wt-type3	0	0	0	0
	tm3489- type1	0	0.10929	0.10929	0.0546448
	tm3489- type2	0	0.0546448	0.0546448	0.0273224
	tm3489- type3	0	0	0	0
	GA-type1	2.54237	0.34153	2.8839	1.44195
	GA-type2	7.20339	2.39071	9.5941	4.79705
	GA-type3	0	0	0	0
	GA*-type1	0.525424	0.45082	0.976243	0.488122
	GA*-type2	0.389831	1.13388	1.52371	0.761855
	GA*-type3	2.54237	0.68306	3.22543	1.61272
